1 **A telomerase with novel non-canonical roles: TERT controls cellular aggregation and**  
2 **tissue size in *Dictyostelium***

3 **Short title: Telomerase TERT controls tissue size in *Dictyostelium***

4 Nasna Nassir<sup>1</sup>, Geoffrey J. Hyde<sup>2</sup>, Ramamurthy Baskar<sup>1</sup>

5 <sup>1</sup>Department of Biotechnology, Bhupat and Jyoti Mehta School of Biosciences, Indian  
6 Institute of Technology-Madras, Chennai, India

7 <sup>2</sup> Independent Researcher, 14 Randwick St, Randwick, New South Wales, Australia.

8 \* Corresponding author

9 E-mail: [rbaskar@iitm.ac.in](mailto:rbaskar@iitm.ac.in) (RB)

10

11 **Abstract**

12 Telomerase, particularly its main subunit, the reverse transcriptase, TERT, prevents DNA  
13 erosion during eukaryotic chromosomal replication, but also has poorly understood non-  
14 canonical functions. Here, in the model social amoeba *Dictyostelium discoideum*, we show  
15 that the protein encoded by *tert* has telomerase-like motifs and regulates, non-canonically,  
16 important developmental processes. Expression levels of wild-type (WT) *tert* were biphasic,  
17 peaking at 8 and 12 h post-starvation, aligning with developmental events, such as the  
18 initiation of streaming (~7 h) and mound formation (~10 h). In *tert* KO mutants, however,  
19 aggregation was delayed until 16 h. Large, irregular streams formed, then broke up, leading  
20 to small mounds. The mound-size defect was not induced when a KO mutant of *countin* (a  
21 master size-regulating gene) was treated with TERT inhibitors but anti-countin antibodies did  
22 rescue size in the *tert* KO. Further, conditioned medium from *countin* mutants failed to  
23 rescue size in the *tert* KO, but the converse experiment worked. These and additional

24 observations indicate that TERT acts upstream of *smlA/countin* to regulate tissue size: (i) the  
25 observed expression levels of *smlA* and *countin*, being respectively lower and higher (than  
26 WT) in the *tert* KO; (ii) the levels of known size-regulation intermediates, glucose (low) and  
27 adenosine (high), in the *tert* mutant, and the size defect's rescue by supplementing glucose or  
28 the adenosine-inhibitor, caffeine; (iii) the induction of the size defect in the WT by *tert* KO  
29 conditioned medium and TERT inhibitors. The *tert* KO's other defects (delayed aggregation,  
30 irregular streaming) were associated with changes to cAMP-regulated processes (e.g.  
31 chemotaxis, cAMP pulsing) and their regulatory factors (e.g. cAMP; *acaA*, *carA* expression).  
32 Overexpression of WT *tert* in the *tert* KO rescued these defects (and size), and restored a  
33 single cAMP signalling centre. Our results indicate that TERT acts in novel, non-canonical  
34 and upstream ways, regulating key developmental events in *Dictyostelium*.

35

## 36 **Author summary**

37 When cells divide, their chromosomes are prone to shrinkage. This risk is reduced by an  
38 enzyme that repairs protective caps on each chromosome after cell division. This enzyme,  
39 telomerase, also has several other important but unrelated roles in human health. Most  
40 importantly, via one or other of its functions, both high and low levels of the enzyme can  
41 contribute to cancer. We have studied, for the first time, the roles played by telomerase in the  
42 life-cycle of the cellular slime mould, *Dictyostelium discoideum*, a model system with a rich  
43 history of helping us understand human biology. While we did not find any evidence of  
44 telomerase having the features typically needed to repair a chromosome, telomerase was  
45 necessary for many aspects of development. In forming the fruiting bodies that help  
46 *Dictyostelium* reproduce, a mutant that lacks telomerase miscalculates how big those bodies  
47 should be, and they end up being too small. Also, earlier, during an earlier stage, aggregation,

48 the migration of cells that form each fruiting body is delayed and irregular. These results are  
49 significant because they show, for the first time, that a telomerase can influence cell  
50 migration and tissue size regulation, two processes involved in a wide range of cancers.

51

## 52 **Introduction**

53 Each time a chromosome replicates, it loses some DNA from each of its ends. This is not  
54 necessarily problematic, because the chromosome is initially capped at each end by a  
55 sacrificial strand of non-coding DNA, a telomere [1-3]. Further instances of replication,  
56 however, can expose the coding DNA, unless the cell can keep repairing the shortened  
57 telomeres, by the action of the enzyme complex, telomerase. Accordingly, telomerase, whose  
58 main subunits comprise a reverse transcriptase (TERT), and the telomerase RNA component  
59 (TERC) [4], has much significance in the biology and pathology of multicellular organisms.  
60 As somatic tissues age, for example, telomerase is downregulated, and the resulting telomeric  
61 dysfunction can lead to chromosomal instability and various pathologies, including disrupted  
62 pregnancies and cancer [5-7]. In other cases, the upregulation of telomerase is also associated  
63 with, and a biomarker of, some cancers, because it allows the unchecked proliferation of  
64 immortalised tumour cells [6, 8]. Telomerase also has many non-canonical roles, in which  
65 telomere maintenance, or even telomerase activity, is not required [9, 10]. For example,  
66 telomerase is known to have non-canonical roles in neuronal differentiation [11], RNA  
67 silencing [12], enhanced mitochondrial function [13] and various cancers [9, 14].

68 Our understanding of telomeres and telomerase began, and has continued to develop, through  
69 the study of model organisms such as *Drosophila*, *Zea mays*, *Tetrahymena*, yeast and mice  
70 [2, 3, 15-19]. One model system in which the possible roles of telomerase have not yet been

71 addressed is *Dictyostelium discoideum*. This system has proved its usefulness in many  
72 contexts, including the study of human diseases [20-24]. One of its advantages is that the  
73 processes of cell division (i.e. growth) and development are uncoupled [25], making the  
74 organism a highly tractable system for the study, in particular, of differentiation and tissue  
75 size regulation [26-33]. In culture, when its bacterial food source is abundant, *D. discoideum*  
76 multiplies as single-celled amoebae. This leads to denser colonies, and exhaustion of the food  
77 supply. The rising concentration of a secreted glycoprotein, CMF, triggers the organism to  
78 switch to a multicellular mode of development [32, 34]. With no resources for further cell  
79 proliferation, the amoebae move, in a radial pattern of streams, towards centres of  
80 aggregation. Rising levels of secreted proteins, of the counting factor (CF) complex [35, 36],  
81 trigger a series of changes that lead to breaking up of the streams, which therefore no longer  
82 contribute cells to the original aggregate. Each aggregate, which will typically contain 20,  
83 000 to 100,000 cells [37], now rounds up into a mound, which then proceeds through several  
84 life-cycle stages, finally forming a spore-dispersing fruiting body about 1-2mm high [32, 38].  
85 Mounds can also develop from the breaking-up of a large stream (or aggregate), a process  
86 similarly regulated by CF [27, 39]. The generic term, ‘group’, can be used to address the fact  
87 that mounds develop from clusters that arise in these slightly different ways, but in this paper  
88 we will refer to ‘mounds’. Some of the processes and regulators involved in our very  
89 abbreviated account of the life-cycle are shown in Fig 1, which focuses on those elements  
90 examined in this study.

91 In addition to being uncoupled from growth, development in *D. discoideum* has other features  
92 that make it potentially useful as a model system for the understanding of telomerase-based  
93 pathologies, in particular cancers that arise from disruption of non-canonical functions. First,  
94 as indicated in Fig 1, development in *D. discoideum* depends on properly regulated cell  
95 motility and cell adhesion, two processes fundamental to metastasis. Second, the switch to

96 multicellular development, and the control of aggregate, mound and hence fruiting body size  
97 are influenced by various secreted factors that, respectively, promote aggregation and  
98 regulate tissue size, in ways analogous to the regulation of tumour size by chalones [40, 41].  
99 Third, a putative TERT has been annotated in the *D. discoideum* genome. It is not known if  
100 the RNA component of telomerase (TERC) is present [42] and, in any case,  
101 extrachromosomal rDNA elements at the ends of each chromosome in *D. discoideum* suggest  
102 a novel telomere structure [43]. Thus, telomerase in this organism may have a separate  
103 mechanism for telomere addition or might have non-canonical roles. As yet, however, there  
104 have been no functional studies of TERT reported for *D. discoideum*.

105 In this study, we characterize the gene *tert* in *D. discoideum*, showing that it has both RT and  
106 RNA binding domains. We describe the pattern of *tert*'s expression levels during all stages of  
107 development, assay for any canonical telomerase function, and examine the effects of  
108 knocking out the gene's function on development. The *tert* mutant exhibits a wide range of  
109 developmental defects, suggesting that wild-type TERT targets multiple elements of the  
110 regulatory network depicted in Fig 1. Most interestingly, these defects, and the results of  
111 experiments by which we attempt to rescue, or phenocopy, the *tert* KO phenotype, suggest  
112 that this telomerase influences the activity of *smlA*, and processes downstream of it. *Tert* thus  
113 emerges as the most upstream gene involved in the cell-counting pathway identified to date,  
114 and its overall influence indicates that, despite having no obvious canonical activity, a  
115 telomerase can nevertheless play major regulatory roles by virtue of its non-canonical targets.

116

## 117 **Results and discussion**

### 118 ***D. discoideum* expresses *tert*, a gene encoding a protein with telomerase motifs**

119 Extending previous predictions of *tert* encoding a protein with telomerase motifs [44], our  
120 use of the Simple Modular Architecture Research Tool (<http://SMART.embl-heidelberg.de>)  
121 and UniProt (Q54B44) revealed the presence of a highly conserved reverse transcriptase  
122 domain and a telomerase RNA binding domain (S1 Fig). These are characteristic of a  
123 telomerase reverse transcriptase [45], supporting the idea that the gene we characterize below  
124 indeed encodes for TERT. The protein shares 23% and 18.7% identity with human and yeast  
125 TERT protein respectively (Pairwise sequence Alignment-Emboss Needle).

126 Telomerase activity, if any, is ascertained by performing a Telomeric Repeat Amplification  
127 Protocol (TRAP) assay. However, while human cell lines (HeLa, HEK) showed telomerase  
128 activity, we did not detect any telomerase activity in *D. discoideum* cell extracts (S2 Fig).  
129 This concurs with previous findings, namely that the telomeres of *D. discoideum* have a  
130 novel structure [46], and that, in other organisms, TERT has several non-canonical roles [11-  
131 13].

132

### 133 **Constitutive expression of telomerase during growth and development in *D. discoideum***

134 In humans, telomerase expression is reported to be low in somatic cells compared to germline  
135 and tumour cells [47]. To ascertain if *tert* expression is differentially regulated during growth  
136 and/or development, we performed qRT-PCR using RNA from different developmental  
137 stages (0, 4, 8, 10, 12, 16 and 24 h after starvation). *Tert* expression is higher in development  
138 than during growth, (8h and 12 h) (Fig 2), implying that *tert* plays a prominent role beyond  
139 the point at which *D. discoideum* is responding to starvation. Expression also shows a marked  
140 biphasic pattern, with the first peak at 8h (when streams are forming), a big dip during stream  
141 breaking (10h) and then rising gradually again to peak at about the time of mound formation  
142 (16h).

143

144 ***tert* KO leads to delayed development, irregular streaming, and smaller mounds and**  
145 **fruiting bodies**

146 To understand the possible non-canonical roles of *tert* in development in *D. discoideum*, *tert*  
147 KO cells generated by homologous recombination were seeded at a density of  $5 \times 10^5$   
148 cells/cm<sup>2</sup> on non-nutrient buffered agar plates and monitored throughout development. While  
149 aggregates appeared by 8 h in the wild-type, and streams began to break at 10 h, in the  
150 mutants there was a further 8 h delay before aggregates were seen, and stream breaking  
151 began at about 18 h. Wild-type cells formed long streams of polarized, elongated cells  
152 leading to aggregation but *tert* KO cells did not form well-defined streams, failing to  
153 aggregate even at  $5 \times 10^4$  cells/cm<sup>2</sup> (wild-type cells aggregated at a density of  $2 \times 10^4$  cells/cm<sup>2</sup>),  
154 suggesting an inability to respond to aggregation-triggering conditions (S3 Fig). The mutant's  
155 streams were also larger (Fig 3A). In contrast to streams moving continuously towards the  
156 aggregation centre in WT, *tert* KO streams break while they aggregate (Supplementary  
157 Videos 1 and 2). They did eventually form aggregates, largely by clumping. During the early  
158 stages of aggregate formation, the number of aggregates formed by the *tert* KO was only  
159 10% of that formed by WT (Fig 3B,  $p < 0.0001$ ). Due to uneven fragmentation, the late  
160 aggregates were also of mixed sizes. The *tert* KO cells did eventually form all of the typical  
161 developmental structures, but by the mound stage, continued fragmentation had resulted in  
162 the mounds being more numerous, and smaller, on average, than in the WT. This was also the  
163 case for fruiting bodies. Thus, with reference to Fig 1, *tert* appears to play roles in multiple  
164 aspects of *Dictyostelium* development: the timing of aggregation; streaming, and the  
165 regulation of the size of the mound and fruiting body (Table 1).

166 **Table 1a. Phenotypic differences between wild-type and *tert* KO development of *D.***  
 167 ***discoideum*, and some possible causal factors (Part 1 of 2)**

|                      | Timing of delay to aggregation | Streaming and Aggregation     | Mound (and fruiting body) size | Mound-size regulation pathway |                                  |                |
|----------------------|--------------------------------|-------------------------------|--------------------------------|-------------------------------|----------------------------------|----------------|
|                      |                                |                               |                                | <i>smlA</i> expression levels | <i>Countin</i> expression levels | Glucose levels |
| Wild-type cells      | Normal                         | Normal                        | Normal                         | Normal                        | Normal                           | Normal         |
| <i>tert</i> KO cells | Delayed (by 8h)                | Fragmented, uneven aggregates | Small                          | Low                           | High*                            | Low*           |

168 Green shading indicates normal (wild-type) levels, or activity. Red shading indicates abnormally high  
 169 or low levels. \*Asterisks refer to atypical processes (or levels) in the *tert* KO cells for which rescue  
 170 attempts were made (see Table 2).

171 **Table 1b. Phenotypic differences between wild-type and *tert* KO development of *D.***  
 172 ***discoideum*, and some possible causal factors (Part 2 of 2)**

|                      | cAMP-related factors (streaming & delay regulation)                                                             |                                             |              |             |                       | Adhesion-related factors (in streaming and mound-size regulation) |                    |                          | Delay-specific regulation |
|----------------------|-----------------------------------------------------------------------------------------------------------------|---------------------------------------------|--------------|-------------|-----------------------|-------------------------------------------------------------------|--------------------|--------------------------|---------------------------|
|                      | Levels of cAMP-related genes: <i>acaA</i> , <i>carA</i> , <i>5'NT</i> , <i>pdsA</i> , <i>regA</i> , <i>pde4</i> | Adenosine/5'NT Levels                       | cAMP centres | cAMP levels | cAMP-based chemotaxis | <i>csaA</i> , <i>cadA</i> expression levels                       | Cell-cell adhesion | Cell-substratum adhesion | Poly-phosphate levels     |
| Wild-type cells      | Normal                                                                                                          | Normal                                      | One          | Normal      | Normal                | Normal                                                            | Normal             | Normal                   | Normal                    |
| <i>tert</i> KO cells | Low at 4h-10h; High by 12h                                                                                      | High/high during stream break; low after. * | Many*        | Low*        | Abnormal              | Low                                                               | Low                | Low                      | Low                       |

173 Green shading indicates normal (wild-type) levels, or activity. Red shading indicates abnormally high  
 174 or low levels. \*Asterisks refer to atypical processes (or levels) in the *tert* KO cells for which rescue  
 175 attempts were made (see Table 2).

176

177 **Many processes and regulators are potentially involved in the phenotypic changes of the**  
 178 ***tert* KO**

179 Given the wide-ranging phenotypic defects seen in the *tert* KO, it seemed likely that *tert* is a  
 180 master regulator, affecting many of the processes and regulators depicted in Fig 1. We thus



181 monitored the activity or levels of a number of those elements, comparing the wild-type and  
 182 *tert* KO (summarised in Table 1). As that summary shows, the *tert* KO showed significant  
 183 changes from the wild-type in three broad areas: components of the mound-size regulation  
 184 pathway; cAMP-related processes/regulators; adhesion-related processes/regulators. As is  
 185 clear from Fig 1, the factors that influence these features overlap considerably, both in terms  
 186 of interacting with each other, and in regulating more than one of the various developmental  
 187 stages disrupted in the *tert* KO. Nevertheless, we think it is useful to consider each of them in  
 188 turn. As we do so below, we describe a series of experiments that largely fall into two broad  
 189 categories, as shown in summary form in Tables 2 and 3: Those that attempt to rescue the  
 190 normal phenotype in *tert* KO cells (Table 2); and those that attempt to phenocopy, or induce,  
 191 the *tert* KO phenotype in wild-type cells (Table 3). First, however, we describe some  
 192 experiments that support the direct involvement of *tert* in the effects already noted.

193 **Table 2. Attempts to rescue normal phenotype (or aggravate<sup>#</sup> the KO phenotype) in *D.***  
 194 ***discoideum tert* KO cells**

|                                      | <b>Timing of delay to aggregation</b> | <b>Streaming and Aggregation</b> | <b>Mound and fruiting body size</b> |
|--------------------------------------|---------------------------------------|----------------------------------|-------------------------------------|
| Overexpression of WT <i>tert</i>     | Rescue                                | Rescue                           | Rescue                              |
| Overexpression of human <i>tert</i>  | No Rescue                             | No Rescue                        | No Rescue                           |
| WT cells (10-50% of total cells)     | Full rescue at 50%                    | No Rescue                        | No Rescue                           |
| WT Conditioned Medium                | No Rescue                             | No Rescue                        | No Rescue                           |
| Anti-countin or anti-CF50 antibodies | No Rescue                             | Part Rescue                      | Part Rescue                         |
| Anti-CF45 antibodies                 | No Rescue                             | No Rescue                        | No Rescue                           |
| <i>Countin</i> KO Conditioned Medium | No Rescue                             | No Rescue                        | No Rescue                           |
| 1mM glucose                          | No Rescue                             | Rescue                           | Rescue                              |
| Caffeine                             | No Rescue                             | Rescue                           | Rescue                              |
| cAMP pulsing                         | No Rescue                             | No Rescue                        | No Rescue                           |
| 8-Br-cAMP                            | No Rescue                             | No Rescue                        | No Rescue                           |
| Anti-AprA, anti-CfaD antibodies      | No Rescue                             | No Rescue                        | No Rescue                           |

|                                     |                                                          |             |             |
|-------------------------------------|----------------------------------------------------------|-------------|-------------|
| <i>tert</i> KO Conditioned Medium # | No aggravation (i.e. 8h delay typical of <i>tert</i> KO) | Aggravation | Aggravation |
|-------------------------------------|----------------------------------------------------------|-------------|-------------|

195 Green shading indicates full or partial rescue of normal (wild-type) levels or activity by a treatment  
 196 applied to *tert* KO cells. Red shading indicates no rescue. The final row refers to an attempt to  
 197 exacerbate the KO phenocopy.

198

199 **Table 3. Attempts to phenocopy the *tert* KO phenotype in wild-type *Dictyostelium* cells**

|                                                                            | Timing of delay to aggregation                    | Streaming and Aggregation  | Mound and fruiting body size |
|----------------------------------------------------------------------------|---------------------------------------------------|----------------------------|------------------------------|
| <i>tert</i> KO Conditioned Medium                                          | Phenocopies <i>tert</i> KO (but delay is only 2h) | Phenocopies <i>tert</i> KO | Phenocopies <i>tert</i> KO   |
| <i>tert</i> KO cells (90-50%)                                              | Normal                                            | Phenocopies <i>tert</i> KO | Phenocopies <i>tert</i> KO   |
| 200uM iron                                                                 | Normal                                            | Phenocopies <i>tert</i> KO | Phenocopies <i>tert</i> KO   |
| BIBR 1532                                                                  | Normal                                            | Phenocopies <i>tert</i> KO | Phenocopies <i>tert</i> KO   |
| MST 312                                                                    | Normal                                            | Phenocopies <i>tert</i> KO | Phenocopies <i>tert</i> KO   |
| <i>tert</i> KO Conditioned Medium added to WT cells of other Dictyostelids | Normal                                            | Normal                     | Normal                       |

200 Red shading indicates full or partial phenocopying of the *tert* KO phenotype by a treatment applied to  
 201 wild-type cells. Green shading indicates that no phenocopying occurred.

202

203 **Support for the involvement of *tert* itself in the *tert* KO**

204 To support the idea that the changes observed in the *tert* KO are, in the first instance, due to  
 205 changes involving *tert* itself, and not some other factor, we took two approaches:  
 206 Overexpression of *tert*, and the use of TERT inhibitors. Most importantly, overexpression of  
 207 wild-type TERT (*act15/gfp::tert*) in *tert* KO cells rescued all three of the phenotypic defects  
 208 (Fig 4A, Supplementary Video 3; Table 2), suggesting that the *tert* KO phenotype is not due  
 209 to any other mutation. Next, we treated wild-type cells with structurally unrelated TERT  
 210 specific inhibitors, BIBR 1532 (100nM) and MST 312 (250nM). BIBR 1532 is a mixed-type

211 non-competitive inhibitor, whereas MST 312 is a reversible inhibitor of telomerase activity  
212 (see Methods). Both inhibitors strikingly phenocopied two features of the *tert* mutant, in that  
213 we observed large early aggregate streams that broke and eventually resulted in mounds (Fig  
214 4B; Table 3) and fruiting bodies that were small. The developmental delay, however, was not  
215 induced. Human TERT [48], which shares a 23% homology with *Dictyostelium* TERT, failed  
216 to rescue *tert* KO phenotype. Surprisingly, the morphologies of TERT overexpressing lines in  
217 the wild-type did not show any significant variation compared to those of the untreated wild-  
218 type (Fig 4A).

219 Overall, these results strongly support the idea that the relevant change in the *tert* KO involve  
220 *tert* itself. The fact that the TERT inhibitors induced only two of the three *tert* KO defects is  
221 interesting. Given the lack of any apparent interconnection between the pathway that  
222 regulates the switch to aggregation, and that regulating mound size, it seems likely that TERT  
223 acts on more than one molecular target. It could be that the inhibitors do not perturb that part  
224 of TERT that interacts with the target that regulates the switch to development.

225

226 **Roles of components of the mound size regulation pathway in the *tert* KO: *smlA*, *CF*,**  
227 ***countin* and glucose**

228 ***smlA* and *countin***

229 Compared to the wild-type, in the *tert* KO cells, *smlA* and *countin* expression levels were,  
230 respectively, low and high (Figs 5A and 5B; Table 1). Also, Western blots performed with  
231 anti-countin antibodies showed higher *countin* expression in *tert* KO cells, compared to wild-  
232 type (Fig 5C). When *tert* was overexpressed in the *tert* KO background, both *countin* and  
233 *smlA* expression levels were returned to those of the wild-type (Figs 5A and 5B). This  
234 overexpression also rescued all the defects of the *tert* KO phenotype (Fig 4A; Table 2). Given

235 the previously proposed regulatory relationship between *smlA* and *countin* (Fig 1; [26, 28,  
236 30]), the most parsimonious explanation for the majority of the results reported so far in this  
237 study, is that one role of *tert* in *D. discoideum* is to promote the expression of *smlA*, thus  
238 indirectly inhibiting *countin* expression, thus reducing glucose levels and mound/fruited  
239 body size. This would make *tert* the most upstream regulator of these structures reported to  
240 date.

241 The likelihood of some involvement of CF itself was supported by the effects of antibodies  
242 that target its components. When *tert* KO cells were treated with anti-countin or anti-CF50  
243 antibodies (1:300 dilution), there was a reduction in aggregate fragmentation resulting in  
244 larger mounds compared to untreated *tert* KO controls (Fig 5D; Table 2); the development  
245 delay was not rescued. Adding anti-CF45 antibodies did not rescue any of the defects (Fig  
246 5D; Table 2).

247 Indirect evidence that *tert* is acting upstream of CF was seen in the lack of effect of adding  
248 BIBR 1532 to *countin* KO cells, which typically exhibit no stream breaking and large  
249 mounds [28]. While, as noted above, BIBR 1532 leads to stream breaking and small mounds  
250 in wild-type cells, it did not lead to any change in the usual phenotype of *countin* KO cells  
251 (e.g. Fig 6A), which argues against *tert* acting downstream of *countin*.

252 Beyond the observations already noted, a range of other observations support the idea that  
253 some of the *tert* KO's features are due to the increased activity of a secreted mound-size  
254 regulating factor, such as countin. Conditioned medium (CM) from *tert* KO cells induced  
255 stream breaking in the wild-type (Fig 6B; Table 3) and led to reduced mound size. Also,  
256 adding *tert* KO CM to the *tert* KO itself aggravated the fragmentation phenotype (Fig 6B;  
257 Table 2). *Tert* KO CM was even capable of inducing stream fragmentation (Fig 6A), and  
258 reducing mound size, in *countin* mutants, suggesting that the CF levels of the *tert* KO CM

259 were high. In each of these three cases, the *tert* KO CM not only affected streaming and  
260 mound size, but also induced, or aggravated, a development delay (Figs 6A and 6B; Tables 2  
261 and 3). This suggests that the unknown TERT-induced factor that affects the developmental  
262 switch is also secreted.

263 Further, the presence of *tert* KO cells, even at very low concentrations (10%), was able to  
264 partially induce the *tert* KO phenotype when added to a population of wild-type cells and  
265 plated at an overall density of  $5 \times 10^5$  cells/cm<sup>2</sup> (Fig 6C; Table 3). The apparent potency of the  
266 presumed high CF levels produced by the *tert* KO cells might partly explain one otherwise  
267 unexpected observation: Adding wild-type CM to *tert* KO cells did not rescue any of their  
268 defects (Fig 6B; Table 2). While the wild-type CM in this case would be expected to act as a  
269 diluent of CF (and thus potentially rescue the *tert* KO), this effect would only be brief.  
270 Development occurs over many hours, during which time the *tert* KO conditions could allow  
271 the build-up of CF back to mound-size-limiting levels. Similar reasoning might also explain  
272 why CM from *countin* KO cells (which exhibit undelayed aggregation and normal streaming)  
273 did not rescue any of the defects of *tert* KO cells (Fig 6A; Table 2).

274 We also observed if *tert* KO CM affected the wild-type cells of other Dictyostelids, such as  
275 *D. minutum*, *D. purpureum*, *D. fasciculatum* and *Polysphondylium pallidum* (each  
276 representing a distinct group in the Dictyostelid taxonomy). CM of *tert* KO did not affect the  
277 mound size of any of the species tested (Fig 7; Table 3) suggesting that some of the factors  
278 regulating mound size may be species specific.

279

### 280 ***Glucose rescued streaming and mound size defects, but not the delay***

281 As per the model shown in Fig 1, one of the more downstream effects that should be seen if  
282 the *tert* KO has higher levels of CF, is the lowering of glucose levels. Glucose levels during

283 aggregation were measured and in the *tert* KO were significantly lower ( $10.7 \pm 0.6$  mg/ml)  
284 compared to wild-type ( $15.5 \pm 0.94$  mg/ml) (Fig 8A,  $p=0.0015$ ). Supplementing 1mM glucose  
285 rescued the aggregate streaming (and mound size), defects of the *tert* KO (Fig 8B), but not, as  
286 expected, the delay (Table 2).

287

### 288 ***Antibodies against AprA and CfaD did not rescue the tert KO phenotype***

289 Previous work has shown that deletion of AprA and CfaD genes, involved in a different cell-  
290 density sensing pathway to that involving *smlA* and countin, leads to changes in mound-size  
291 [29], but, here, antibodies against AprA and CfaD did not rescue the KO phenotype (Fig 9),  
292 suggesting, again, that impaired mound size determination in the *tert* KO is largely due to  
293 defective CF signal transduction.

294

### 295 **Roles of cAMP and cAMP-related processes and factors in the *tert* KO**

296 Given the perturbations seen in the *tert* KO, one would predict some abnormalities associated  
297 with cAMP dynamics [49-54]. The role of cAMP in streaming, in particular, has been much  
298 studied. Below we examine how various cAMP processes or factors, related to streaming and  
299 developmental delay, were affected in the *tert* KO.

300

### 301 ***Multiple cAMP wave generating centres observed in the tert KO***

302 Starving cells normally aggregate by periodic synthesis and relay of cAMP, resulting in the  
303 outward propagation of cAMP waves from the aggregation centres [55]. We visualized  
304 cAMP waves by recording the time-lapse of development and then subtracting the image  
305 pairs [56]. Coordinated changes in cell shape and movement of cAMP waves can indirectly

306 be visualized by dark field optics because of the differences in the optical density of cells  
307 moving/not moving in response to cAMP. Compared to the wild-type, which had a single  
308 wave generating centre, the *tert* KO had multiple wave propagating centres (Fig 10,  
309 Supplementary Videos 4 and 5). When the *tert* KO was rescued by overexpression of wild-  
310 type *tert*, so was the single wave propagating centre. The optical wave density analysis  
311 suggests that cAMP wave propagation is defective in *tert* KO, also contributing to stream  
312 breaking.

313

314 ***cAMP-related gene expression, cAMP levels, chemotaxis and relay were also impaired in***  
315 ***the tert KO***

316 Both the switch to aggregation, and normal streaming, require that a great variety of other  
317 cAMP-related processes occur properly. We quantified the relative expression of genes  
318 involved in cAMP synthesis and signaling in wild-type and *tert* KO cells by qRT-PCR during  
319 streaming as well as breaking (Figs 12A and 12B). With respect to the switch to aggregation,  
320 the expression levels of *acaA* (cAMP synthesis), *carA* (cAMP receptor), *5'NT* (5'  
321 nucleotidase), *pdsA* (cAMP phosphodiesterases), *regA* and *pde4* were low initially but most  
322 started to 'recover' closer to the time that the *tert* KO manages to overcome its  
323 developmental delay (Figs 11A-F). Another, perhaps more meaningful, approach is to  
324 compare the levels in the mutant and wild-type when they are at equivalent developmental  
325 stages. This was done at two stages (aggregation, stream breaking) for four of the cAMP  
326 genes (*acaA*, *carA*, *pdsA*, *pde4*). During aggregation (i.e. at 8 h in the wild-type; 16 h in the  
327 *tert* KO), *acaA* and *carA* expression levels were significantly lower in the mutant, and the  
328 other two genes trended lower (Fig 12A). During stream breaking (10 h; 18 h, respectively),  
329 only *acaA* was significantly lower.

330 Correspondingly, at 8 h of development, cAMP levels were also lower in the *tert* KO  
331 ( $0.98 \pm 0.08$  nM in the KO;  $1.59 \pm 0.15$  nM in wild-type; Fig 12C,  $p=0.005$ ). By 12 h, however,  
332 as the *tert* KO cells are closer to the time when their streaming will begin (i.e. 16 h) both  
333 cAMP-related gene expression, and cAMP levels increase, implying that the initially down-  
334 regulated expression of cAMP signaling might explain the long-delayed switch to  
335 aggregation in the *tert* KO. As to how cAMP-related genes or processes do recover in the  
336 absence of TERT, there are no indications in our results, but regulatory networks are well-  
337 known to exhibit a degree of robustness [57, 58].

338 As noted, cAMP-related gene expression levels of the *tert* KO lag behind that of the wild-  
339 type, and even though they increase as the mutant enters a similar developmental phase, the  
340 cAMP levels never catch up completely. When cAMP levels were quantified during  
341 aggregation and stream breaking using an ELISA-based competitive immunoassay, the  
342 cAMP levels in the wild-type and *tert* KO were  $1.59 \pm 0.15$  nM and  $1.48 \pm 0.25$  nM,  
343 respectively, during aggregation (Fig 12D,  $p=0.73$ ); and  $1.05 \pm 0.11$  nM and  $0.74 \pm 0.70$  nM  
344 during stream breaking (Fig 12E,  $p=0.04$ ). Thus, these lower absolute levels of cAMP in the  
345 *tert* KO may also contribute to abnormal stream breaking, with the amoebae unable to relay  
346 signals to their neighbours.

347 To test whether cAMP-based chemotaxis was normal, we performed an under-agarose  
348 chemotaxis assay, towards  $10 \mu\text{M}$  cAMP. The trajectories of cells were tracked and their  
349 chemotaxis parameters were quantified. Although the speed of cells towards cAMP was  
350 higher in *tert* KO ( $16.01 \pm 1.39 \mu\text{m}/\text{min}$ ) compared to the wild-type ( $12.74 \pm 0.43 \mu\text{m}/\text{min}$ ), the  
351 directionality was significantly reduced in *tert* KO cells ( $0.37 \pm 0.03$  compared  $0.59 \pm 0.04$ ).  
352 The chemotactic index of *tert* KO cells also was lower ( $0.63 \pm 0.05$ ) compared to wild-type  
353 cells ( $0.82 \pm 0.06$ ) (Figs 13A-C).



354

355 ***The chemotaxis defect of the tert KO was not rescued by cAMP pulsing or 8-Br-cAMP***

356 To gain further insights into the streaming defect of the *tert* KO cells, we examined if cAMP  
357 pulsing could rescue the chemotaxis defect [59, 60]. cAMP (50nM) pulsing was carried out  
358 every 6 minutes for 4 hours and thereafter, the cells were seeded in the starvation buffer at a  
359 density of  $5 \times 10^5$  cells/cm<sup>2</sup> and different developmental stages were monitored (Fig 14A). The  
360 streaming defect of *tert* KO was not rescued by cAMP pulsing, suggesting that other  
361 components of cAMP signaling are necessary to rescue the defect.

362 If cAMP receptor activity is compromised, that could also lead to defective signaling and to  
363 test this, we used a membrane-permeable cAMP analog 8-Br-cAMP, which has poor affinity  
364 for extracellular cAMP receptors and enters the cells directly [61]. Cells were incubated with  
365 5mM 8-Br-cAMP and after 5 h, the cells were transferred to Bonners Salt Solution and  
366 different developmental stages were monitored (Fig 14B). Adding 8-Br-cAMP did not rescue  
367 the *tert* KO phenotype, suggesting that cAMP receptor function is not impaired in the mutant.

368

369 ***High adenosine levels in the tert KO induced large aggregation streams***

370 As mentioned previously, adenosine and caffeine are known to alter the cAMP relay [62, 63],  
371 thereby affecting aggregate size. This occurs in a number of Dictyostelids [33]. We observed  
372 enhanced expression of 5'NT in the *tert* KO (Fig 15A,  $p=0.0042$ ) suggesting increased  
373 adenosine levels (5'NT converts AMP to adenosine). Hence, adenosine levels were  
374 quantified and these were significantly higher ( $235.37 \pm 26.44$  nM/ $10^6$  cells) in *tert* KO cells  
375 compared to wild-type ( $35.39 \pm 12.78$  nM/ $10^6$  cells) (Fig 15B,  $p=0.0051$ ). The adenosine  
376 antagonist, caffeine (1 mM), rescued the streaming defect (Fig 15C), and restored the mound  
377 size, suggesting that excess adenosine in the *tert* KO causes larger streams. It did not,

378 however, rescue the developmental delay. Since glucose also rescues the streaming defect in  
379 *tert* KO cells, adenosine levels were quantified subsequent to treating with 1mM glucose.  
380 Glucose treatment reduced adenosine levels ( $13.07 \pm 7.51$  nM/ $10^6$  cells) in *tert* KO cells to a  
381 level that is more comparable to wild-type cells ( $35.39 \pm 12.78$  nM/ $10^6$  cells), but as already  
382 noted, it did not rescue the developmental delay. Importantly, *5'NT* expression and adenosine  
383 levels reduced significantly subsequent to stream breaking (S4 Fig). This could perhaps be  
384 due to negative feedback on *tert* itself. When wild-type cells were treated with 2mM  
385 adenosine, *tert* expression levels were reduced, although not significantly so (S5 Fig).

386

### 387 ***Streaming defects of the tert KO were not due to increased iron levels***

388 *Dictyostelium* cells, when grown in the presence of 200 $\mu$ M iron, formed large streams that  
389 fragmented into multiple mounds, strikingly resembling the *tert* KO phenotype [64]. As the  
390 phenotypes had similarities, we examined if TERT mediates its effect by altering intracellular  
391 iron levels. We quantified iron by ICP-MS and the levels were not significantly different  
392 between the wild-type ( $16.38 \pm 1.21$  ng/ $10^7$  cells) and *tert* KO cells ( $15.25 \pm 0.81$  ng/ $10^7$  cells)  
393 (S6 Fig,  $p=0.4573$ ), suggesting that *tert* KO phenotype is not due to altered iron levels.

394

### 395 **The role of adhesion-related factors in the tert KO, as they affect streaming and mound** 396 **size**

397 Cell-substratum adhesion is also important for migration and proper streaming. By spinning  
398 cells at different speeds (0, 25, 50 and 75 rpm), it is possible to vary substratum dependent  
399 shear force. Thus, by counting the fraction of floating cells at different speeds, it is possible  
400 to check substratum dependent adhesion. Although both wild-type and *tert* KO cells  
401 exhibited a shear force-dependent decrease in cell-substratum adhesion, *tert* KO cells

402 exhibited a significantly weaker cell-substratum adhesion (Fig 16,  $p < 0.0001$ ), thus indicating  
403 a contribution to stream breaking.

404 Cell-cell adhesion is also an important determinant of streaming and mound size in  
405 *Dictyostelium* [39]. To examine if adhesion is impaired in the mutant, we checked the  
406 expression of two major cell adhesion proteins, *cadA*, expressed post-starvation (2 h) and  
407 *csaA* expressed during early aggregation (6 h). *cadA*-mediated cell-cell adhesion is  $\text{Ca}^{2+}$ -  
408 dependent and thus EDTA-sensitive, while *csaA* is  $\text{Ca}^{2+}$  independent and EDTA-resistant  
409 [65]. Both *csaA* and *cadA* expression were significantly down-regulated (Figs 17A and 17B).

410 Further, cell adhesion was monitored indirectly by counting the fraction of single cells not  
411 joining the aggregate. Aggregation results in the gradual disappearance of single cells and  
412 thus it is possible to measure aggregation by determining the ratio of single cells remaining.  
413 To examine  $\text{Ca}^{2+}$ -dependent cell-cell adhesion, the assay was performed in the presence of 10  
414 mM EDTA. Both EDTA-sensitive and resistant cell-cell adhesion were significantly  
415 defective in *tert* KO cells (Figs 17C,  $p = 0.0033$  and 17D,  $p = 0.0015$ ).

416 These results imply that defective cell-substratum, and cell-cell adhesion might play roles in  
417 the abnormal streaming and mound-size regulation of the *tert* KO.

418

419 **The developmental delay of the *tert* KO was associated with reduced polyphosphate**  
420 **levels**

421 One interesting observation was that the only treatment that fully rescued the *tert* KO cells  
422 was the overexpression of wild-type *tert*. Also, the only other treatment that rescued the  
423 developmental delay itself was mixing wild-type cells with the *tert* KO cells at a 1:1 ratio  
424 (Fig 18; Table 2). Even though caffeine and glucose rescued streaming and mound size, and  
425 apparently this was at least partly mediated via their impact on cAMP-regulated processes,

426 neither of the compounds rescued the delay, even though abnormalities of cAMP-regulated  
427 processes are commonly reported causes of delay in other *Dictyostelium* studies [52-54].

428 Thus, we examined polyphosphate levels in the *tert* KO because of their known importance  
429 to developmental timing in *Dictyostelium* [66]. We stained the CM with DAPI for 5 mins and  
430 checked the polyphosphate specific fluorescence using a spectrofluorometer. The CM of *tert*  
431 KO cells has reduced polyphosphate levels ( $49.55 \pm 2.02 \mu\text{M}$ ) compared to wild-type  
432 ( $60.62 \pm 1.95 \mu\text{M}$ ), implying that low polyphosphate levels might also contribute to the delay  
433 in initiating development in this system (Fig 19,  $p=0.0009$ ).

434

## 435 **Conclusions**

436 Our results reveal that TERT plays an important role in many aspects of *Dictyostelium*  
437 development. The *tert* KO exhibited a wide range of developmental defects. Despite suitable  
438 environmental conditions for multicellular development to begin, the start of the streaming  
439 phase is delayed by 8 h. Having once begun, development proceeds and ends abnormally,  
440 with large streams, uneven fragmentation, and, eventually, small mounds and fruiting bodies.  
441 The wide-ranging developmental defects are associated with changes to the levels, or  
442 expression, of genes and compounds that are known to be highly upstream regulators of the  
443 various stages of development, such as streaming and mound/fruiting body formation. Based  
444 on the perturbations in the *tert* KO, and our other experiments, Fig 20 depicts the possible  
445 extent of processes, and potential mediating factors, that might depend upon normal *tert*  
446 expression/TERT activity in the wild-type. Note that the arrows that connect *tert*/TERT to  
447 any element in the diagram are not meant to suggest that TERT directly regulates that  
448 element, only that TERT is important, perhaps in some indirect way, for the normal levels, or  
449 activity, of that element.

450 One of the most striking findings was that TERT appears to regulate, or is at least necessary  
451 for, the normal activity of what was previously known as the most upstream regulator of  
452 mound size, *smlA* [26, 28, 30]. Expression levels of *smlA* were reduced in the *tert* KO, and  
453 we also observed a wide variety of the expected downstream effects of lowered *smlA* levels.  
454 All of these, and a wide variety of treatments that rescued the size-defect of the mutant  
455 phenotype, support the idea that the reduction of mound size in the *tert* KO was indeed  
456 mediated via the abnormal functioning of the previously-identified elements of the mound-  
457 size regulation pathway.

458 In addition to the rescue approach, treatments that attempted to phenocopy the *tert* KO  
459 phenotype in the wild-type, also suggest TERT is a highly upstream regulator of mound size.  
460 In particular, given that size regulation in *D. discoideum* depends upon secreted factors of the  
461 CF complex, one would have predicted the effects we observed when *tert* KO CM was added  
462 to wild-type cells. Another strong indication that *tert* acts upstream, at least of CF, was that  
463 the inhibition of *tert* activity in *countin* mutants failed to phenocopy the *tert* KO phenotype.

464 A similarly rich range of results (involving the *tert* KO phenotype, and its rescue, and  
465 phenocopying) support the idea that TERT also plays a high-level role in the regulation of  
466 streaming. During the streaming phase, two genes associated with cAMP related-processes in  
467 *D. discoideum* (*acaA*, *carA*) were significantly downregulated (compared to the wild-type),  
468 and the levels of several other genes trended lower. This was also accompanied by lower  
469 cAMP levels. This could explain the defective chemotaxis and cell motility of the *tert* KO.

470 Of course, the regulation of streaming is not entirely isolated from that of size. Glucose, one  
471 of the central elements of the CF pathway, influences several cAMP-related processes [67].  
472 Thus, it was not surprising that adding 1mM glucose to the *tert* KO cells rescued both the  
473 size and streaming defects. This study, however, provided a new insight into how the rescue

474 of streaming occurs, because added glucose also reduced adenosine levels. Thus, in the *tert*  
475 KO, the low glucose levels might lead to higher adenosine levels, allowing it to inhibit cAMP  
476 related processes (via pathway i, Fig 20). In normal development, given that the known  
477 sequence of the telomere repeats of *D. discoideum* (A-G<sub>(1-8)</sub>; [43]), and the fact that  
478 telomerase activity would therefore recruit cellular stores of adenosine, it is possible that  
479 normal TERT activity keeps adenosine levels low. As yet, however, whether TERT actually  
480 acts as a functional telomerase in *D. discoideum* is not known.

481 The *tert* gene we characterized includes the conserved domains and structure of a telomerase  
482 reverse transcriptase. Also, supplementing structurally unrelated but specific inhibitors of  
483 TERT to wild type cells phenocopies the mutant phenotype. The widely used method to test  
484 telomerase activity is the TRAP assay. However, this method failed to detect telomerase  
485 activity in *D. discoideum* and there may be both technical and innate limitations. For  
486 example, possible reasons are that: (i) the presence of rDNA palindrome elements in the  
487 chromosomal ends, suggesting a novel telomere structure and the possible role of TERT in  
488 maintaining both rDNA and chromosomal termini; and (ii) polyasparagine repeats, present in  
489 the TERT protein of *Dictyostelium*, splitting the functional domain into two halves. It is not  
490 clear whether the loss of TERT function is due to the absence of normal eukaryote telomeres  
491 in *D. discoideum* [68].

492 The discussion so far, while it establishes that TERT is needed for several developmental  
493 processes to take place, does not help to distinguish whether or not it acts more than once, or  
494 if it has more than one target. Could TERT for example act more like the much studied  
495 homeodomain proteins, master regulators of animal development, but which only act during  
496 very early embryological life [69, 70]? Likewise, in *D. discoideum*, CMF appears to act only  
497 once [32]. Two lines of argument suggest that TERT is different.

498 First, the biphasic nature of *tert*'s expression pattern suggest that it acts during at least two  
499 stages of development. In the wild-type, *tert* expression builds up to its first peak at 8 h, thus  
500 being a strong candidate for enabling streaming to begin, and to proceed correctly, around  
501 this time. It then dips markedly to a low point at 10 h, whereby it might help to enable stream  
502 break-up by its relative absence. Then, it begins its climb to its second peak at 12 h, when  
503 mound size is being finalised.

504 Second, while it is well known that cAMP-related processes play important roles in allowing  
505 streaming to begin and to proceed properly, and while we have shown that TERT influences  
506 multiple cAMP related processes, the pathway by which TERT influences the initiation of  
507 streaming seems distinct from that used for maintaining it. Both glucose and caffeine, for  
508 example, rescued the streaming and size defects of the *tert* KO, but the delay was unaffected.  
509 Complementarily, when wild-type cells were mixed at 50% with *tert* KO cells, they rescued  
510 the delay defect only. In fact, the only treatment that fully rescued the *tert* KO was the  
511 overexpression of wild-type *tert*.

512 This study indicates for, the first time, that TERT acts in several non-canonical ways in *D.*  
513 *discoideum*, influencing when aggregation begins, the processes involved in streaming, and  
514 the eventual size of the fruiting body. TERT's influences appear to occur upstream of many  
515 other regulators, and, in particular, TERT could be the most upstream regulator of mound and  
516 fruiting body size identified so far. Curiously, as yet we have no evidence that TERT acts as a  
517 canonical telomerase, nor is it known whether any other enzyme protects the unusually  
518 sequenced telomeres of this species. In the most heavily studied stages of the organism's life-  
519 cycle, that is, those that occur in response to starvation, replication has ceased, so further  
520 study of this particular point should focus on the amoeboid stage. More generally, this study  
521 has revealed several previously unreported non-canonical processes influenced by a

522 telomerase. TERT's roles in influencing cell motility and adhesion, and the levels of chalone-  
523 like secreted factors, bear consideration by those engaged in cancer research.

524

## 525 **Methods**

### 526 ***Dictyostelium* culture and development**

527 Wild-type *D. discoideum* (AX2) cells were grown with *Klebsiella aerogenes* on SM/5 plates,  
528 or axenically, in modified maltose-HL5 medium (28.4 g bacteriological peptone, 15 g yeast  
529 extract, 18 g maltose monohydrate, 0.641 g Na<sub>2</sub>HPO<sub>4</sub> and 0.49 g KH<sub>2</sub>PO<sub>4</sub> per litre, pH 6.4)  
530 containing 100 units penicillin and 100 mg/ml streptomycin-sulphate. Cells were also grown  
531 in Petri dishes as monolayers. Other Dictyostelid species (*D. minutum*, *D. purpureum*, *D.*  
532 *fasciculatum* and *Polysphondylym pallidum*) were grown with *Klebsiella aerogenes* on SM/5  
533 plates and cells were harvested when there was visible clearing of bacterial lawns.

534 To trigger development, cells were washed with KK<sub>2</sub> buffer (2.25 g KH<sub>2</sub>PO<sub>4</sub> and 0.67 g  
535 K<sub>2</sub>HPO<sub>4</sub> per liter, pH 6.4) and plated on 1% non-nutrient KK<sub>2</sub> agar plates at a density of  
536 5x10<sup>5</sup> cells/cm<sup>2</sup> in a dark, moist chamber [71]. To study streaming, cells were seeded in  
537 submerged condition (KK<sub>2</sub> buffer) at a density of 5x10<sup>5</sup> cells/cm<sup>2</sup>.

538 BIBR 1532 is a specific non-competitive inhibitor of TERT with IC<sub>50</sub> value of 93 nM for  
539 human telomerase [72]. To find the optimal dose response of BIBR 1532 in Dictyostelium,  
540 starved cells were plated in phosphate buffered agar with different concentrations of BIBR  
541 1532 (10 nM, 25 nM, 50 nM, 100nM and 200 nM) and 100nM was found to be the minimal  
542 effective dose in inducing complete stream breaking. MST 312, which is structurally  
543 unrelated to BIBR 1532, is a reversible inhibitor of TERT with IC<sub>50</sub> value of 0.67 μM for



544 human telomerase [73]. The minimal effective dose in *Dictyostelium* was found to be 250  
545 nM.

546

#### 547 **Construction of *tert* expression vector**

548 Using genomic DNA as template, a 3.8kb *tert* sequence was PCR amplified using ExTaq  
549 polymerase (Takara) and ligated in pDXA-GFP2 vector by exploiting the HindIII and KpnI  
550 restriction sites. This vector was electroporated to *tert* KO and AX2 cells and G418 resistant  
551 (10 µg/ml) clones were selected and overexpression was confirmed by semi-quantitative  
552 PCR. Primer sequences used for generating the vectors are mentioned in S1 Table.

553

#### 554 **Conditioned medium assay**

555 Conditioned medium was prepared as described previously with slight modifications [74].  
556 Briefly, log phase cells of AX2 and *tert* KO were resuspended at a density of  $1 \times 10^7$  cells/ml  
557 and kept under shaking conditions for 20 h. Cells were pelleted and the supernatant was  
558 further clarified by centrifugation. The clarified supernatant (CM) was used immediately. To  
559 check the effect of CM on aggregate size, cells were developed in the presence of CM on  
560 non-nutrient agar plates and development was monitored. KK<sub>2</sub> buffer was used as control. To  
561 deplete extracellular CF with anti-countin antibodies, cells were starved in KK<sub>2</sub> buffer. After  
562 1 h, the cells were developed with anti-countin antisera (1:300 dilution) in KK<sub>2</sub> [75].

563

#### 564 **Western blot**

565 To examine countin protein expression levels during aggregation, Western blot was  
566 performed with anti-countin antibody. Cells were resuspended in SDS laemmli buffer, and

567 boiled for 3 min. Subsequently, the samples were run in a 12% SDS-polyacrylamide gel and  
568 Western blots were developed using an ECL Western blotting kit (Biorad). Rabbit anti-  
569 countin antibodies were used at 1: 3000 dilutions.

570

### 571 **Cell-cell adhesion assay**

572 Log phase cells were starved at a density of  $1 \times 10^7$  cells/ml in  $\text{KK}_2$  buffer in shaking  
573 conditions at 22 °C for 4 h. At the beginning of starvation,  $4 \times 10^7$  cells were removed and  
574 resuspended in 2 mL Sorensen phosphate buffer, vortexed vigorously and 0.4 mL of cell  
575 suspension was pipetted immediately in vials containing 0.4 ml ice-cold Sorensen phosphate  
576 buffer or 0.4 mL of 20 mM EDTA solution. The cell suspension was then transferred to a  
577 shaker and incubated for 30 min and 0.2 mL of 10% glutaraldehyde was added to each  
578 sample at the end of incubation and stored for 10 min. Then, 7 ml Sorensen phosphate buffer  
579 was added to each vial. Cell adhesion was indirectly measured by counting the number of  
580 single cells left behind using a hemocytometer [76].

581

### 582 **Cell-substratum adhesion**

583 To measure cell-substratum adhesion,  $5 \times 10^5$  cells were seeded in 60mm Petri dishes and  
584 incubated at 22 °C for 12 hours. The Petri dishes with the cell suspension was placed on an  
585 orbital shaker at different speeds (0, 25, 50, 75 rpm). After 1 h, adherent and non-adherent  
586 cells were harvested, counted using a hemocytometer and the fraction of adherent cells was  
587 plotted against the rotation speed [77].

588

### 589 **Visualization of cAMP waves**

590 To visualize cAMP wave propagation,  $5 \times 10^5$  cells/cm<sup>2</sup> were plated on 1% non-nutrient agar  
591 plates and developed in dark moist conditions at 22 °C. On a real-time basis, the aggregates  
592 were filmed at an interval of 30 s/frame, using a Nikon CCD camera and documented with  
593 NIS-Elements D software (Nikon, Japan). For visualizing cAMP optical density waves,  
594 image pairs were subtracted [56] using Image J (NIH, Bethesda, MD).

595

### 596 **Under agarose cAMP chemotaxis assay**

597 The under agarose cAMP chemotaxis assay was performed as described previously [78].  
598 Briefly, 100 µl of cell suspension starved at a density of  $1 \times 10^7$  cells/ml in KK<sub>2</sub> buffer was  
599 added to outer troughs and 10 µM cAMP was added in the middle trough of a 1% agarose  
600 plate. Cells migrating towards cAMP was recorded every 30 s for 15 min with an inverted  
601 Nikon Eclipse TE2000 microscope using NIS-Elements D software (Nikon, Japan). For  
602 calculating the average velocity, directionality and chemotactic index, each time 36 cells  
603 were analyzed. The cells were tracked using ImageJ. Velocity was calculated by dividing the  
604 total displacement of cells with time. Directionality was calculated as the ratio of absolute  
605 distance traveled to the total path length, where a maximum value of 1 represents a straight  
606 path without deviations. Chemotactic index was calculated as the ratio of the average velocity  
607 of a cell moving against a cAMP gradient to the average cell speed. It is a global measure of  
608 direction of cell motion.

609

### 610 **Quantitative real-time PCR (qRT-PCR)**

611 Total RNA was isolated from AX2 and *tert* KO cells at the indicated time points (0–24 h)  
612 using TRIzol reagent (Life Technologies, USA) [79]. RNA samples were quantified with a  
613 spectrophotometer (Eppendorf) and were also analyzed on 1% TAE agarose gels. cDNA was

614 synthesized from total RNA using cDNA synthesis kit (Verso, Thermo-scientific). 1 µg of  
615 total RNA was used as a template to synthesize cDNA using random primers provided by the  
616 manufacturer. 1 µl of cDNA was used for qRT-PCR, using SYBR Green Master Mix  
617 (Thermo-scientific). qRT-PCR was carried out to analyze the expression levels of *tert*, *acaA*,  
618 *carA*, *pdsA*, *regA*, *pde4*, 5'NT, *countin* and *smlA* using the QuantStudio Flex 7 (Thermo-  
619 Fischer). *mflA* was used as mRNA amplification control. All the qRT-PCR data were  
620 analyzed as described [80]. The primer sequences are mentioned in S2 Table.

621

### 622 **cAMP quantification**

623 cAMP levels were quantitated using cAMP-XP™ assay kit as per the manufacturer's  
624 protocol (Cell signalling, USA). AX2 and *tert* KO cells developed on 1% KK<sub>2</sub> agar, were  
625 lysed with 100 µl of 1X lysis buffer and incubated on ice for 10 min. 50 µl of the lysate and  
626 50 µl HRP-linked cAMP solution were added to the assay plates, incubated at room  
627 temperature (RT) on a horizontal orbital shaker. The wells were emptied after 3 hours,  
628 washed thrice with 200 µl of 1X wash buffer. 100 µl of tetramethylbenzidine (TMB)  
629 substrate was added and incubated at RT for 10 min. The reaction was terminated by adding  
630 100 µl of stop solution and the absorbance was measured at an optical density of 450 nm. The  
631 cAMP standard curve was used to calculate absolute cAMP levels.

632

### 633 **Glucose quantification**

634 Glucose levels were quantified as per the manufacturer's protocol (GAHK20; Sigma-  
635 Aldrich). Mid-log phase cells were harvested and resuspended at a density of 8x10<sup>6</sup> cells/ml  
636 in KK<sub>2</sub> buffer and kept in shaking conditions at 22 °C. Cells were collected again and lysed  
637 by freeze-thaw method. 35 µl of the supernatant was mixed with 200 µl of glucose assay

638 reagent and incubated for 15 minutes. The absorbance was measured at an optical density of  
639 540 nm. The glucose standard curve was used to calculate absolute glucose levels.

640

#### 641 **Adenosine quantification**

642 Adenosine quantification was performed as per the manufacturer's protocol (MET5090;  
643 Cellbio Labs). Cells grown in HL5 media was washed and seeded at a density of  $5 \times 10^5$   
644 cells/cm<sup>2</sup> on KK<sub>2</sub> agar plates. The aggregates were harvested using the lysis buffer (62.5mM  
645 Tris-HCl, pH 6.8, 2% SDS, 10% glycerol). 50 µl sample was mixed with control mix  
646 (without adenosine deaminase) or reaction mix (with adenosine deaminase) in separate wells  
647 and incubated for 15 minutes. The fluorescence was measured using a spectrofluorometer  
648 (Ex- 550nm, Em- 595nm). The adenosine fluorescence in the sample was calculated by  
649 subtracting fluorescence of control mixed sample from reaction mixed sample. The adenosine  
650 standard curve was used to calculate absolute adenosine levels.

651

#### 652 **Polyphosphate measurements**

653 The conditioned media was incubated with 25 µg/ml DAPI for 5 minutes and polyphosphate  
654 specific fluorescence was measured using a spectrofluorometer (Ex- 415nm, Em- 550nm) as  
655 previously described [81]. Conditioned medium samples were prepared in FM minimal  
656 media to reduce the amount of background fluorescence. Polyphosphate concentration, in  
657 terms of phosphate monomers were determined using polyphosphate standards.

658

#### 659 **Microscopy**

660 A Nikon SMZ-1000 stereo zoom microscope with epifluorescence optics, Nikon 80i Eclipse  
661 upright microscope or a Nikon Eclipse TE2000 inverted microscope equipped with a digital  
662 sight DS-5MC camera (Nikon) were used for microscopy. Images were processed with NIS-  
663 Elements D (Nikon) or Image J.

664

### 665 **Statistical tools**

666 Microsoft Excel (2016) was used for data analyses. Unpaired student's t-test and two-way  
667 ANOVA (GraphPad Prism, version 6) were used to determine the statistical significance.

668

### 669 **Acknowledgments**

670 We thank the Dictyostelium Stock Center, USA for supplying *Dictyostelium* strains and  
671 plasmids. We thank Dr Richard Gomer (Texas A&M University) for providing countin,  
672 CF50, CF45, AprA and CfaD antibodies. Polyphosphate standards were a kind gift from Dr  
673 Toshikazu Shiba (RegeneTiss Inc.). hTERT cDNA was a kind gift from Dr. Jayakrishnan  
674 Nandakumar (University of Michigan). The telomerase activity assay protocol was suggested  
675 by Dr Elizabeth Blackburn. NN acknowledges Rakesh Mani, Shalini Umachandran, Prajna A  
676 Rai and J Meenakshi for discussions.

677

### 678 **Author Contributions**

679 NN, RB designed the experiments. NN performed the experiments. NN, GH and RB  
680 analyzed the data. NN, GH and RB wrote the manuscript and all authors read and approved  
681 the final manuscript.

682

## 683 **References**

- 684 1. Blackburn EH. Telomeres and telomerase: their mechanisms of action and the effects  
685 of altering their functions. *Febs Letters*. 2005;579(4):859-62. doi:  
686 10.1016/j.febslet.2004.11.036.
- 687 2. Blackburn EH, Gall JG. A tandemly repeated sequence at the termini of the  
688 extrachromosomal ribosomal RNA genes in *Tetrahymena*. *Journal of Molecular Biology*.  
689 1978;120(1):33-53. doi: 10.1016/0022-2836(78)90294-2.
- 690 3. Greider CW, Blackburn EH. Identification of a specific telomere terminal transferase  
691 activity in *tetrahymena* extracts. *Cell*. 1985;43(2):405-13. doi: 10.1016/0092-8674(85)90170-  
692 9.
- 693 4. Weinrich SL, Pruzan R, Ma L, Ouellette M, Tesmer VM, Holt SE, et al.  
694 Reconstitution of human telomerase with the template RNA component hTR and the catalytic  
695 protein subunit hTRT. *Nature Genetics*. 1997;17(4):498-502. doi: 10.1038/ng1297-498.
- 696 5. Artandi SE, Chang S, Lee S-L, Alson S, Gottlieb GJ, Chin L, et al. Telomere  
697 dysfunction promotes non-reciprocal translocations and epithelial cancers in mice. *Nature*.  
698 2000;406(6796):641-5. doi: 10.1038/35020592.
- 699 6. Aubert G, Lansdorp PM. Telomeres and aging. *Physiological reviews*.  
700 2008;88(2):557-79. doi: 10.1152/physrev.00026.2007. PubMed PMID: 18391173.
- 701 7. Keefe DL, Franco S, Liu L, Trimarchi J, Cao B, Weitzen S, et al. Telomere length  
702 predicts embryo fragmentation after in vitro fertilization in women—Toward a telomere  
703 theory of reproductive aging in women. *American Journal of Obstetrics and Gynecology*.  
704 2005;192(4):1256-60. doi: 10.1016/j.ajog.2005.01.036.
- 705 8. Mu J, Wei LX. Telomere and telomerase in oncology. *Cell research*. 2002;12(1):1-7.  
706 doi: 10.1038/sj.cr.7290104. PubMed PMID: 11942406.
- 707 9. Parkinson EK, Fitchett C, Cereser B. Dissecting the non-canonical functions of  
708 telomerase. *Cytogenetic and Genome Research*. 2008;122(3-4):273-80. doi:  
709 10.1159/000167813.
- 710 10. Teichroeb JH, Kim J, Betts DH. The role of telomeres and telomerase reverse  
711 transcriptase isoforms in pluripotency induction and maintenance. *RNA Biology*.  
712 2016;13(8):707-19. doi: 10.1080/15476286.2015.1134413.
- 713 11. Klapper W, Shin T, Mattson MP. Differential regulation of telomerase activity and  
714 TERT expression during brain development in mice. *Journal of neuroscience research*.  
715 2001;64(3):252-60. doi: 10.1002/jnr.1073. PubMed PMID: 11319769.
- 716 12. Maida Y, Yasukawa M, Furuuchi M, Lassmann T, Possemato R, Okamoto N, et al.  
717 An RNA-dependent RNA polymerase formed by TERT and the RMRP RNA. *Nature*.  
718 2009;461(7261):230-5. doi: 10.1038/nature08283. PubMed PMID: 19701182; PubMed  
719 Central PMCID: PMC2755635.
- 720 13. Ahmed S, Passos JF, Birket MJ, Beckmann T, Brings S, Peters H, et al. Telomerase  
721 does not counteract telomere shortening but protects mitochondrial function under oxidative  
722 stress. *Journal of cell science*. 2008;121(Pt 7):1046-53. doi: 10.1242/jcs.019372. PubMed  
723 PMID: 18334557.
- 724 14. Liu Z, Li Q, Li K, Chen L, Li W, Hou M, et al. Telomerase reverse transcriptase  
725 promotes epithelial–mesenchymal transition and stem cell-like traits in cancer cells.  
726 *Oncogene*. 2013;32(36):4203.
- 727 15. Gilson E, Ségal-Bendirdjian E. The telomere story or the triumph of an open-minded  
728 research. *Biochimie*. 2010;92(4):321-6. doi: 10.1016/j.biochi.2009.12.014.

- 729 16. McClintock B. The Behavior in Successive Nuclear Divisions of a Chromosome  
730 Broken at Meiosis. PNAS. 1939;25(8):405-16. doi: 10.1073/pnas.25.8.405.
- 731 17. McClintock B. The stability of broken ends of chromosomes in *Zea mays*. Genetics.  
732 1941;26(2):234.
- 733 18. Muller HJ. The remaking of chromosomes. Collecting net. 1938;13:181-98.
- 734 19. Szostak JW, Blackburn EH. Cloning yeast telomeres on linear plasmid vectors. Cell.  
735 1982;29(1):245-55. doi: 10.1016/0092-8674(82)90109-x.
- 736 20. Annesley SJ, Fisher PR. Dictyostelium discoideum—a model for many reasons.  
737 Molecular and cellular biochemistry. 2009;329(1-2):73-91.
- 738 21. Maniak M. Dictyostelium as a model for human lysosomal and trafficking diseases.  
739 Seminars in Cell and Developmental Biology. 2011 ;22(1):114-9. doi:  
740 10.1016/j.semcdb.2010.11.001.
- 741 22. Muller-Taubenberger A, Kortholt A, Eichinger L. Simple system--substantial share:  
742 the use of Dictyostelium in cell biology and molecular medicine. European journal of cell  
743 biology. 2013;92(2):45-53. doi: 10.1016/j.ejcb.2012.10.003. PubMed PMID: 23200106.
- 744 23. Williams JG. Dictyostelium Finds New Roles to Model. Genetics. 2010;185(3):717-  
745 26. doi: 10.1534/genetics.110.119297.
- 746 24. Williams RSB, Boeckeler K, Gräf R, Müller-Taubenberger A, Li Z, Isberg RR, et al.  
747 Towards a molecular understanding of human diseases using Dictyostelium discoideum.  
748 Trends in Molecular Medicine. 2006;12(9):415-24. doi: 10.1016/j.molmed.2006.07.003.
- 749 25. Hohl HR, Raper KB. Control of sorocarp size in the cellular slime mold  
750 Dictyostelium discoideum. Developmental Biology. 1964;9(1):137-53. doi: 10.1016/0012-  
751 1606(64)90018-1.
- 752 26. Brock DA, Buczynski G, Spann TP, Wood SA, Cardelli J, Gomer RH. A  
753 Dictyostelium mutant with defective aggregate size determination. Development.  
754 1996;122(9):2569-78. PubMed PMID: 8787732.
- 755 27. Brock DA, Ehrenman K, Ammann R, Tang Y, Gomer RH. Two components of a  
756 secreted cell number-counting factor bind to cells and have opposing effects on cAMP signal  
757 transduction in Dictyostelium. The Journal of biological chemistry. 2003;278(52):52262-72.  
758 doi: 10.1074/jbc.M309101200. PubMed PMID: 14557265.
- 759 28. Brock DA, Gomer RH. A cell-counting factor regulating structure size in  
760 Dictyostelium. Genes & development. 1999;13(15):1960-9. PubMed PMID: 10444594;  
761 PubMed Central PMCID: PMC316923.
- 762 29. Brock DA, Gomer RH. A secreted factor represses cell proliferation in Dictyostelium.  
763 Development. 2005;132(20):4553-62. doi: 10.1242/dev.02032. PubMed PMID: 16176950;  
764 PubMed Central PMCID: PMC4484793.
- 765 30. Brown JM, Firtel RA. Just the right size: cell counting in Dictyostelium. Trends in  
766 genetics : TIG. 2000;16(5):191-3. PubMed PMID: 10782107.
- 767 31. Gomer RH, Jang W, Brazill D. Cell density sensing and size determination.  
768 Development, growth & differentiation. 2011;53(4):482-94. doi: 10.1111/j.1440-  
769 169X.2010.01248.x. PubMed PMID: 21521184; PubMed Central PMCID: PMC3097309.
- 770 32. Jain R, Yuen IS, Taphouse CR, Gomer RH. A density-sensing factor controls  
771 development in Dictyostelium. Genes and development. 1992;6(3):390-400. doi:  
772 10.1101/gad.6.3.390.
- 773 33. Jaiswal P, Soldati T, Thewes S, Baskar R. Regulation of aggregate size and pattern by  
774 adenosine and caffeine in cellular slime molds. BMC developmental biology. 2012;12:5. doi:  
775 10.1186/1471-213X-12-5. PubMed PMID: 22269093; PubMed Central PMCID:  
776 PMC3341216.



- 777 34. Mehdy MC, Firtel RA. A secreted factor and cyclic AMP jointly regulate cell-type-  
778 specific gene expression in *Dictyostelium discoideum*. *Molecular and Cellular Biology*.  
779 1985;5(4):705-13. doi: 10.1128/mcb.5.4.705.
- 780 35. Brock DA, Hatton RD, Giurgiutiu DV, Scott B, Ammann R, Gomer RH. The  
781 different components of a multisubunit cell number-counting factor have both unique and  
782 overlapping functions. *Development*. 2002;129(15):3657-68. PubMed PMID: 12117815.
- 783 36. Brock DA, Hatton RD, Giurgiutiu DV, Scott B, Jang W, Ammann R, et al. CF45-1, a  
784 secreted protein which participates in *Dictyostelium* group size regulation. *Eukaryotic cell*.  
785 2003;2(4):788-97. PubMed PMID: 12912898; PubMed Central PMCID: PMC178340.
- 786 37. Bonner JT, Hoffman ME. Evidence for a Substance Responsible for the Spacing  
787 Pattern of Aggregation and Fruiting in the Cellular Slime Molds. *Journal of Embryology and*  
788 *Experimental Morphology*. 1963;11(3):571.
- 789 38. Loomis W. *Dictyostelium discoideum*: a developmental system. Cell. 2012. Elsevier.
- 790 39. Roisin-Bouffay C, Jang W, Caprette DR, Gomer RH. A precise group size in  
791 *Dictyostelium* is generated by a cell-counting factor modulating cell-cell adhesion. *Molecular*  
792 *cell*. 2000;6(4):953-9. PubMed PMID: 11090633.
- 793 40. Bakthavatsalam D, Brock DA, Nikravan NN, Houston KD, Hatton RD, Gomer RH.  
794 The secreted *Dictyostelium* protein CfaD is a chalone. *Journal of cell science*. 2008;121(Pt  
795 15):2473-80. doi: 10.1242/jcs.026682. PubMed PMID: 18611962; PubMed Central PMCID:  
796 PMC2716657.
- 797 41. Iversen OH. Some theoretical considerations on chalones and the treatment of cancer:  
798 a review. *Cancer research*. 1970;30(5):1481-4.
- 799 42. Gaudet P, Fey P, Basu S, Bushmanova YA, Dodson R, Sheppard KA, et al. dictyBase  
800 update 2011: web 2.0 functionality and the initial steps towards a genome portal for the  
801 *Amoebozo*DDB0192195. *Nucleic acids research*. 2011;39(Database issue):D620-4. doi:  
802 10.1093/nar/gkq1103. PubMed PMID: 21087999; PubMed Central PMCID: PMC3013695.
- 803 43. Eichinger L, Pachebat JA, Glockner G, Rajandream MA, Sugang R, Berriman M, et  
804 al. The genome of the social amoeba *Dictyostelium discoideum*. *Nature*. 2005;435(7038):43-  
805 57. doi: 10.1038/nature03481. PubMed PMID: 15875012; PubMed Central PMCID:  
806 PMC1352341.
- 807 44. Sýkorová E, Fajkus J. Structure-function relationships in telomerase genes. *Biology*  
808 *of the cell*. 2009;101(7):375-406. doi: 10.1042/bc20080205.
- 809 45. Cong YS, Wright WE, Shay JW. Human telomerase and its regulation. *Microbiology*  
810 *and molecular biology reviews* : MMBR. 2002;66(3):407-25, table of contents. PubMed  
811 PMID: 12208997; PubMed Central PMCID: PMC120798.
- 812 46. Eichinger L, Noegel AA. Comparative genomics of *Dictyostelium discoideum* and  
813 *Entamoeba histolytica*. *Current opinion in microbiology*. 2005;8(5):606-11. doi:  
814 10.1016/j.mib.2005.08.009. PubMed PMID: 16125444.
- 815 47. Shay JW, Zou Y, Hiyama E, Wright WE. Telomerase and cancer. *Human molecular*  
816 *genetics*. 2001;10(7):677-85. PubMed PMID: 11257099.
- 817 48. Cristofari G, Lingner J. Telomere length homeostasis requires that telomerase levels  
818 are limiting. *The EMBO journal*. 2006;25(3):565-74. doi: 10.1038/sj.emboj.7600952.  
819 PubMed PMID: 16424902; PubMed Central PMCID: PMC1383536.
- 820 49. Riedel V, Gerisch G, Muller E, Beug H. Defective cyclic adenosine-3', 5'-phosphate-  
821 phosphodiesterase regulation in morphogenetic mutants of *Dictyostelium discoideum*.  
822 *Journal of molecular biology*. 1973;74(4):573-85. PubMed PMID: 4354075.
- 823 50. Faure M, Podgorski GJ, Franke J, Kessin RH. Disruption of *Dictyostelium*  
824 *discoideum* morphogenesis by overproduction of cAMP phosphodiesterase. *Proceedings of*  
825 *the National Academy of Sciences of the United States of America*. 1988;85(21):8076-80.  
826 PubMed PMID: 2847151; PubMed Central PMCID: PMC282357.

- 827 51. Kesbeke F, Van Haastert PJ. Reduced cAMP secretion in Dictyostelium discoideum  
828 mutant HB3. *Developmental Biology*. 1988;130(2):464-70. PubMed PMID: 2848740.
- 829 52. Mayanagi T, Amagai A, Maeda Y. DNG1, a Dictyostelium homologue of tumor  
830 suppressor ING1 regulates differentiation of Dictyostelium cells. *Cellular and molecular life  
831 sciences : CMLS*. 2005;62(15):1734-43. doi: 10.1007/s00018-005-4570-0. PubMed PMID:  
832 16003496.
- 833 53. Sasaki K, Chae SC, Loomis WF, Iranfar N, Amagai A, Maeda Y. An immediate-early  
834 gene, srsA: its involvement in the starvation response that initiates differentiation of  
835 Dictyostelium cells. *Differentiation*. 2008;76(10):1093-103. doi: 10.1111/j.1432-  
836 0436.2008.00298.x. PubMed PMID: 18673382.
- 837 54. Bolourani P, Spiegelman GB, Weeks G. Delineation of the roles played by RasG and  
838 RasC in cAMP-dependent signal transduction during the early development of Dictyostelium  
839 discoideum. *Molecular biology of the cell*. 2006;17(10):4543-50. doi: 10.1091/mbc.e05-11-  
840 1019. PubMed PMID: 16885420; PubMed Central PMCID: PMC1635367.
- 841 55. Weijer CJ. Dictyostelium morphogenesis. *Current opinion in genetics &  
842 development*. 2004;14(4):392-8. doi: 10.1016/j.gde.2004.06.006. PubMed PMID: 15261655.
- 843 56. Siegert F, Weijer CJ. Spiral and concentric waves organize multicellular  
844 Dictyostelium mounds. *Current biology : CB*. 1995;5(8):937-43. PubMed PMID: 7583152.
- 845 57. El-Brolosy MA, Stainier DYR. Genetic compensation: A phenomenon in search of  
846 mechanisms. *PLOS Genetics*. 2017;13(7):e1006780. doi: 10.1371/journal.pgen.1006780.
- 847 58. Tautz D. Problems and paradigms: Redundancies, development and the flow of  
848 information. *BioEssays*. 1992;14(4):263-6. doi: doi:10.1002/bies.950140410.
- 849 59. Darmon M, Brachet P, Da Silva LH. Chemotactic signals induce cell differentiation in  
850 Dictyostelium discoideum. *Proceedings of the National Academy of Sciences of the United  
851 States of America*. 1975;72(8):3163-6. PubMed PMID: 171655; PubMed Central PMCID:  
852 PMC432941.
- 853 60. Mann SK, Firtel RA. Cyclic AMP regulation of early gene expression in  
854 Dictyostelium discoideum: mediation via the cell surface cyclic AMP receptor. *Molecular  
855 and Cellular Biology*. 1987;7(1):458-69. PubMed PMID: 3031475; PubMed Central PMCID:  
856 PMC365089.
- 857 61. Van Haastert PJ, Kien E. Binding of cAMP derivatives to Dictyostelium discoideum  
858 cells. Activation mechanism of the cell surface cAMP receptor. *The Journal of biological  
859 chemistry*. 1983;258(16):9636-42. PubMed PMID: 6309778.
- 860 62. Theibert A, Devreotes PN. Adenosine and its derivatives inhibit the cAMP signaling  
861 response in Dictyostelium discoideum. *Developmental Biology*. 1984;106(1):166-73.  
862 PubMed PMID: 6092178.
- 863 63. Brenner M, Thoms SD. Caffeine blocks activation of cyclic AMP synthesis in  
864 Dictyostelium discoideum. *Developmental Biology*. 1984;101(1):136-46. PubMed PMID:  
865 6319207.
- 866 64. Buracco S, Peracino B, Andreini C, Bracco E, Bozzaro S. Differential Effects of Iron,  
867 Zinc, and Copper on Dictyostelium discoideum Cell Growth and Resistance to Legionella  
868 pneumophila. *Frontiers in cellular and infection microbiology*. 2017;7:536. doi:  
869 10.3389/fcimb.2017.00536. PubMed PMID: 29379774; PubMed Central PMCID:  
870 PMC5770829.
- 871 65. Coates JC, Harwood AJ. Cell-cell adhesion and signal transduction during  
872 Dictyostelium development. *Journal of cell science*. 2001;114(Pt 24):4349-58. PubMed  
873 PMID: 11792801.
- 874 66. Suess PM, Watson J, Chen W, Gomer RH. Extracellular polyphosphate signals  
875 through Ras and Akt to prime Dictyostelium discoideum cells for development. *Journal of*

- 876 cell science. 2017;130(14):2394-404. doi: 10.1242/jcs.203372. PubMed PMID: 28584190;  
877 PubMed Central PMCID: PMC5536921.
- 878 67. Jang W, Chiem B, Gomer RH. A secreted cell number counting factor represses  
879 intracellular glucose levels to regulate group size in dictyostelium. *The Journal of biological*  
880 *chemistry*. 2002;277(42):39202-8. doi: 10.1074/jbc.M205635200. PubMed PMID:  
881 12161440.
- 882 68. Heidel AJ, Lawal HM, Felder M, Schilde C, Helps NR, Tunggal B, et al. Phylogeny-  
883 wide analysis of social amoeba genomes highlights ancient origins for complex intercellular  
884 communication. *Genome research*. 2011;21(11):1882-91. doi: 10.1101/gr.121137.111.  
885 PubMed PMID: 21757610; PubMed Central PMCID: PMC3205573.
- 886 69. Bürglin TR, Affolter M. Homeodomain proteins: an update. *Chromosoma*.  
887 2016;125(3):497-521. Epub 2015/10/13. doi: 10.1007/s00412-015-0543-8. PubMed PMID:  
888 26464018.
- 889 70. Gehring WJ, Affolter M, Bürglin T. Homeodomain proteins. *Annual Review of*  
890 *Biochemistry*. 1994;63(1):487-526. doi: 10.1146/annurev.bi.63.070194.002415.
- 891 71. Fey P, Kowal AS, Gaudet P, Pilcher KE, Chisholm RL. Protocols for growth and  
892 development of *Dictyostelium discoideum*. *Nature protocols*. 2007;2(6):1307-16. doi:  
893 10.1038/nprot.2007.178. PubMed PMID: 17545967.
- 894 72. Damm K, Hemmann U, Garin-Chesa P, Hael N, Kauffmann I, Priepeke H, et al. A  
895 highly selective telomerase inhibitor limiting human cancer cell proliferation. *The EMBO*  
896 *journal*. 2001;20(24):6958-68. doi: 10.1093/emboj/20.24.6958. PubMed PMID: 11742973;  
897 PubMed Central PMCID: PMC125790.
- 898 73. Seimiya H, Oh-hara T, Suzuki T, Naasani I, Shimazaki T, Tsuchiya K, et al. Telomere  
899 shortening and growth inhibition of human cancer cells by novel synthetic telomerase  
900 inhibitors MST-312, MST-295, and MST-1991. *Molecular cancer therapeutics*.  
901 2002;1(9):657-65. PubMed PMID: 12479362.
- 902 74. Gomer RH, Yuen IS, Firtel RA. A secreted 80 x 10(3) Mr protein mediates sensing of  
903 cell density and the onset of development in *Dictyostelium*. *Development*. 1991;112(1):269-  
904 78. PubMed PMID: 1663029.
- 905 75. Tang L, Gao T, McCollum C, Jang W, Vicker MG, Ammann RR, et al. A cell  
906 number-counting factor regulates the cytoskeleton and cell motility in *Dictyostelium*.  
907 *Proceedings of the National Academy of Sciences of the United States of America*.  
908 2002;99(3):1371-6. doi: 10.1073/pnas.022516099. PubMed PMID: 11818526; PubMed  
909 Central PMCID: PMC122197.
- 910 76. Desbarats L, Brar SK, Siu CH. Involvement of cell-cell adhesion in the expression of  
911 the cell cohesion molecule gp80 in *Dictyostelium discoideum*. *Journal of cell science*.  
912 1994;107 ( Pt 6):1705-12. PubMed PMID: 7962211.
- 913 77. Fey P, Stephens S, Titus MA, Chisholm RL. SadA, a novel adhesion receptor in  
914 *Dictyostelium*. *The Journal of cell biology*. 2002;159(6):1109-19. doi:  
915 10.1083/jcb.200206067. PubMed PMID: 12499361; PubMed Central PMCID:  
916 PMC2173991.
- 917 78. Woznica D, Knecht DA. Under-agarose chemotaxis of *Dictyostelium discoideum*.  
918 *Methods in molecular biology*. 2006;346:311-25. doi: 10.1385/1-59745-144-4:311. PubMed  
919 PMID: 16957299.
- 920 79. Pilcher KE, Gaudet P, Fey P, Kowal AS, Chisholm RL. A general purpose method for  
921 extracting RNA from *Dictyostelium* cells. *Nature protocols*. 2007;2(6):1329-32. doi:  
922 10.1038/nprot.2007.191. PubMed PMID: 17545970.
- 923 80. Schmittgen TD, Livak KJ. Analyzing real-time PCR data by the comparative C(T)  
924 method. *Nature protocols*. 2008;3(6):1101-8. PubMed PMID: 18546601.

- 925 81. Aschar-Sobbi R, Abramov AY, Diao C, Kargacin ME, Kargacin GJ, French RJ, et al.  
926 High sensitivity, quantitative measurements of polyphosphate using a new DAPI-based  
927 approach. *Journal of fluorescence*. 2008;18(5):859-66. doi: 10.1007/s10895-008-0315-4.  
928 PubMed PMID: 18210191.
- 929 82. Van Haastert PJ. Sensory adaptation of *Dictyostelium discoideum* cells to  
930 chemotactic signals. *The Journal of cell biology*. 1983;96(6):1559-65. PubMed PMID:  
931 6304109; PubMed Central PMCID: PMC2112430.
- 932 83. Chisholm RL, Firtel RA. Insights into morphogenesis from a simple developmental  
933 system. *Nature reviews Molecular cell biology*. 2004;5(7):531-41. doi: 10.1038/nrm1427.  
934 PubMed PMID: 15232571.
- 935 84. Wang B, Kuspa A. *Dictyostelium* development in the absence of cAMP. *Science*.  
936 1997;277(5323):251-4. PubMed PMID: 9211856.
- 937 85. Rutherford CL, Overall DF, Ubeidat M, Joyce BR. Analysis of 5' nucleotidase and  
938 alkaline phosphatase by gene disruption in *Dictyostelium*. *Genesis*. 2003;35(4):202-13. doi:  
939 10.1002/gene.10185. PubMed PMID: 12717731.
- 940 86. Garcia GL, Rericha EC, Heger CD, Goldsmith PK, Parent CA. The group migration  
941 of *Dictyostelium* cells is regulated by extracellular chemoattractant degradation. *Molecular*  
942 *biology of the cell*. 2009;20(14):3295-304. doi: 10.1091/mbc.E09-03-0223. PubMed PMID:  
943 19477920; PubMed Central PMCID: PMC2710833.
- 944 87. Bader S, Kortholt A, Snippe H, Van Haastert PJ. DdPDE4, a novel cAMP-specific  
945 phosphodiesterase at the surface of *dictyostelium* cells. *The Journal of biological chemistry*.  
946 2006;281(29):20018-26. doi: 10.1074/jbc.M600040200. PubMed PMID: 16644729.
- 947 88. Gomer RH, Yuen IS, Firtel RA. A secreted 80 × 10(3) Mr protein mediates sensing of  
948 cell density and the onset of development in *Dictyostelium*. *Development*. 1991;112(1):269.
- 949 89. Loomis WF. Cell signaling during development of *Dictyostelium*. *Developmental*  
950 *biology*. 2014;391(1):1-16. doi: 10.1016/j.ydbio.2014.04.001.
- 951 90. Ma H, Gamper M, Parent C, Firtel RA. The *Dictyostelium* MAP kinase kinase  
952 DdMEK1 regulates chemotaxis and is essential for chemoattractant-mediated activation of  
953 guanylyl cyclase. *The EMBO journal*. 1997;16(14):4317-32. PubMed PMID: 9250676;  
954 PubMed Central PMCID: PMC1170058.
- 955 91. Schaap P, Wang M. Interactions between adenosine and oscillatory cAMP signaling  
956 regulate size and pattern in *Dictyostelium*. *Cell*. 1986;45(1):137-44. PubMed PMID:  
957 3006924.
- 958 92. Gao T, Knecht D, Tang L, Hatton RD, Gomer RH. A cell number counting factor  
959 regulates Akt/protein kinase B to regulate *Dictyostelium discoideum* group size. *Eukaryotic*  
960 *cell*. 2004;3(5):1176-84. doi: 10.1128/EC.3.5.1176-1184.2004. PubMed PMID: 15470246;  
961 PubMed Central PMCID: PMC522607.
- 962 93. Swaney KF, Huang CH, Devreotes PN. Eukaryotic chemotaxis: a network of  
963 signaling pathways controls motility, directional sensing, and polarity. *Annual review of*  
964 *biophysics*. 2010;39:265-89. doi: 10.1146/annurev.biophys.093008.131228. PubMed PMID:  
965 20192768; PubMed Central PMCID: PMC4364543.
- 966 94. Varnum B, Soll DR. Effects of cAMP on single cell motility in *Dictyostelium*. *The*  
967 *Journal of cell biology*. 1984;99(3):1151-5. PubMed PMID: 6088555; PubMed Central  
968 PMCID: PMC2113391.
- 969 95. Jang W, Gomer RH. Exposure of cells to a cell number-counting factor decreases the  
970 activity of glucose-6-phosphatase to decrease intracellular glucose levels in *Dictyostelium*  
971 *discoideum*. *Eukaryotic cell*. 2005;4(1):72-81. doi: 10.1128/EC.4.1.72-81.2005. PubMed  
972 PMID: 15643062; PubMed Central PMCID: PMC544156.
- 973 96. Jang W, Gomer RH. A protein in crude cytosol regulates glucose-6-phosphatase  
974 activity in crude microsomes to regulate group size in *Dictyostelium*. *The Journal of*



- 975 biological chemistry. 2006;281(24):16377-83. doi: 10.1074/jbc.M509995200. PubMed  
976 PMID: 16606621; PubMed Central PMCID: PMC4486306.
- 977 97. Varnum B, Edwards KB, Soll DR. The developmental regulation of single-cell  
978 motility in *Dictyostelium discoideum*. *Developmental Biology*. 1986;113(1):218-27. PubMed  
979 PMID: 3943662.
- 980 98. Tang L, Ammann R, Gao T, Gomer RH. A cell number-counting factor regulates  
981 group size in *Dictyostelium* by differentially modulating cAMP-induced cAMP and cGMP  
982 pulse sizes. *The Journal of biological chemistry*. 2001;276(29):27663-9. doi:  
983 10.1074/jbc.M102205200. PubMed PMID: 11371560.
- 984 99. Beug H, Katz FE, Gerisch G. Dynamics of antigenic membrane sites relating to cell  
985 aggregation in *Dictyostelium discoideum*. *The Journal of cell biology*. 1973;56(3):647-58.  
986 PubMed PMID: 4631665; PubMed Central PMCID: PMC2108928.
- 987 100. Yang C, Brar SK, Desbarats L, Siu CH. Synthesis of the Ca(2+)-dependent cell  
988 adhesion molecule DdCAD-1 is regulated by multiple factors during *Dictyostelium*  
989 development. *Differentiation; research in biological diversity*. 1997;61(5):275-84. doi:  
990 10.1046/j.1432-0436.1997.6150275.x. PubMed PMID: 9342838.
- 991 101. Tarantola M, Bae A, Fuller D, Bodenschatz E, Loomis W. Cell Substratum Adhesion  
992 during Early Development of *Dictyostelium discoideum*. *PLoS One*. 2014;9(9):e106574. doi:  
993 10.1371/journal.pone.0106574.
- 994 102. Coates JC, Harwood AJ. Cell-cell adhesion and signal transduction during  
995 *Dictyostelium* development. *Journal of cell science*. 2001;114(24):4349-58.

996

997

998 **Figure legends:**

999 **Fig 1. Some of the events, processes and regulators of growth and development in *D.***  
1000 ***discoideum*.** This figure depicts only a small number of the hypothesized regulatory pathways  
1001 of *Dictyostelium* growth and development, focusing on those that were examined  
1002 experimentally in this study. A line ending in an arrowhead suggests that the first element  
1003 directly or indirectly promotes the activity or levels of the second; inhibition is suggested by  
1004 a line ending in a cross-bar. Published works that report on the nature of each pathway within  
1005 the network are as follows: a[29], [40]; b[29]; c[66]; d[52], [53], [54]; e[61], [82], [83], [84];  
1006 f[85]; g [86], [87]; h[88-90]; i[91], [33]; j[77]; k[92], [93], [94]; l[26], [39]; m[27]; n[35];  
1007 o[95], [96]; p[67]; q[67], [75]; r[67]; s[97]; t[75]; u[65]; v[98], [39]; w[99], [100]; x[66];  
1008 y[101].

1009 **Fig 2. *Tert* expression during growth and development in *D. discoideum*.** *Tert* is a single  
1010 copy gene in *Dictyostelium*. Total RNA was extracted from *Dictyostelium* strain AX2 during  
1011 vegetative growth and development. To analyze *tert* expression, qRT-PCR was carried out  
1012 and fold change was calculated. *rnlA* was used as a control. Time points are shown in hours  
1013 (bottom). qRT-PCR was carried out thrice. Error bars represent the mean and SEM.

1014 **Fig 3. Developmental phenotype of *tert* KO.** (A) AX2 and *tert* KO cells plated on 1% non-  
1015 nutrient KK<sub>2</sub> agar plates at a density of 5x10<sup>5</sup> cells/cm<sup>2</sup> were incubated in a dark, moist  
1016 chamber. After 16 hours, large aggregate streams were formed in *tert* KO. The time points in  
1017 hours are shown at the top. Scale bar-0.5 mm. (B) Quantitative measurement of aggregation.  
1018 The number of aggregates was counted per centimetre square area. Level of significance is  
1019 indicated as \*p<0.05, \*\*p<0.01, \*\*\*p<0.001, and \*\*\*\*p<0.0001.

1020 **Fig 4.** (A) Overexpression of TERT (*act15/gfp::tert*) rescued *tert* KO phenotype. Scale bar-  
1021 0.5 mm. (B) AX2 cells treated with 100nM BIBR 1532 and 250 nM MST 312 phenocopied  
1022 the *tert* KO streaming phenotype. The time points in hours are shown at the top. Scale bar-0.5  
1023 mm.

1024 **Fig 5. *Tert* regulates the levels of CF.** qRT-PCR of (A) *countin* and (B) *smlA* during  
1025 aggregation in AX2, *tert* KO and *tert* KO [*act15/gfp<sub>tert</sub>*]. *rnlA* was used as mRNA  
1026 amplification control. Level of significance is indicated as \*p<0.05, \*\*p<0.01, \*\*\*p<0.001,  
1027 and \*\*\*\*p<0.0001. (C) Western blots with anti-countin antibodies. The gels were stained  
1028 with Coomassie to show equal loading. (D) *Countin* KO cells were developed in the presence  
1029 of *tert* KO conditioned media or BIBR1532. Scale bar- 0.5 mm. D) Cells were starved and  
1030 developed with anti-countin, CF50, CF45, AprA and CfaD antibodies (1:300 dilution).  
1031 Addition of anti-countin and anti-CF50 antibodies rescued *tert* KO group size defect. Scale  
1032 bar- 0.5 mm.

1033 **Fig 6. *Tert* regulates the levels of CF.** (A) *Countin* KO cells were developed in the presence  
1034 of *tert* KO conditioned media or BIBR1532. Scale bar- 0.5 mm. (B) Development in the  
1035 presence of conditioned medium. *Tert* KO-CM induced stream breaking in AX2. (C)  
1036 Reconstitution of AX2 in 1:9 ratio with *tert* KO did not rescue the stream breaking. Scale  
1037 bar- 0.5 mm.

1038 **Fig 7. Development of other Dictyostelid species in the presence of *tert* KO conditioned**  
1039 **medium.** *tert* KO-CM did not alter the group size of other Dictyostelids. Scale bar- 0.5 mm.

1040 **Fig 8. Effect of glucose on *tert* KO aggregate size.** (A) Glucose levels during aggregation.  
1041 (B) Wild-type AX2 and *tert* KO cells were developed in the presence of 1 mM glucose.  
1042 Glucose rescues the streaming defect of *tert* KO. Scale bar- 0.5 mm. Level of significance is  
1043 indicated as \* $p < 0.05$ , \*\* $p < 0.01$ , \*\*\* $p < 0.001$ , and \*\*\*\* $p < 0.0001$ .

1044 **Fig 9.** Cells were starved and developed with AprA and CfaD antibodies (1:300 dilution).  
1045 Scale bar- 0.5 mm.

1046 **Fig 10. cAMP wave generating centres.** Optical density wave images depicting wave  
1047 generating centres in AX2, *tert* KO and rescue strain are shown. AX2 and rescue strain has a  
1048 single wave generating centre, whereas *tert* KO has multiple wave generating centres in a  
1049 single aggregate. Scale bar- 1 mm.

1050 **Fig 11: Delayed development in *tert* KO.** (A-F) qRT-PCR of genes involved in the cAMP  
1051 relay. Down-regulation of genes involved in the cAMP relay in *tert* KO. Fold change in  
1052 mRNA expression is relative to AX2 at the indicated time points. *rnlA* is used as mRNA  
1053 amplification control.

1054 **Fig 12. Defective cAMP relay of *tert* KO.** cAMP relay and expression of *acaA*, *carA*, *pde4*,  
1055 *pdsA* in *tert* KO during (A) aggregation and (B) stream breaking. Fold change in mRNA  
1056 expression is relative to AX2 at the indicated time points. *rnlA* was used as mRNA

1057 amplification control. cAMP levels in *tert* KO during (C) 8 h of development in AX2 and *tert*  
1058 KO, (D) aggregation, (E) stream breaking. Level of significance is indicated as \* $p < 0.05$ ,  
1059 \*\* $p < 0.01$ , \*\*\* $p < 0.001$ , and \*\*\*\* $p < 0.0001$ .

1060 **Fig 13. Defective cAMP chemotaxis of *tert* KO.** Under-agarose cAMP chemotaxis assay in  
1061 response to 10 $\mu$ M cAMP. (A) Average chemotaxis speed in response to cAMP. (B)  
1062 directionality of chemotaxing cells and (C) chemotaxis index are shown. The graph  
1063 represents the mean and SEM of 3 independent experiments.

1064 **Fig 14. cAMP sensing in *tert* KO.** (A) Wild-type and *tert* KO cells were starved for 1 hour  
1065 and pulsed every 6 min with 50 nM cAMP for 4 h. Cells were then resuspended in BSS and  
1066 seeded at a density of 1x10<sup>5</sup> cells/ml, and observed under a microscope. (B) Wild-type and  
1067 *tert* KO cells were washed in BSS, seeded at a density of 1x10<sup>5</sup> cells/ml, and incubated in  
1068 BSS or BSS + 5 mM 8-Br-cAMP for 5 h. Cells were washed and then observed under a  
1069 microscope. Scale bar- 100  $\mu$ m.

1070 **Fig 15. Effect of adenosine on aggregate size.** (A) qRT-PCR of 5'NT. Fold change in  
1071 mRNA expression is relative to AX2 at indicated time points. *rnlA* is used as mRNA  
1072 amplification control. (B) Quantification of adenosine levels. Level of significance is  
1073 indicated as \* $p < 0.05$ , \*\* $p < 0.01$ , \*\*\* $p < 0.001$ , and \*\*\*\* $p < 0.0001$ . (C) Cells were developed  
1074 in the presence of 1mM caffeine; *tert* KO streaming defect was rescued. Scale bar- 0.5 mm.

1075 **Fig 16. Disruption of *tert* affects cell substratum adhesion.** Cells were plated at a density  
1076 of 1x10<sup>5</sup> cells/ml, grown overnight, in an orbital shaker. Floating and attached cells were  
1077 counted and percentage adhesion was plotted versus rotation speed. Both AX2 and *tert* KO  
1078 exhibited a shear force-dependent decrease in substratum adhesion and *tert* KO exhibited  
1079 significantly reduced adhesion compared to AX2 cells.



1080 **Fig 17. Disruption of *tert* affects cell adhesion.** qRT-PCR of (A) *csaA* and (B) *cadA*. *rnlA*  
1081 was used as mRNA amplification control. Wild-type and *tert* KO cells were starved in  
1082 Sorensen phosphate buffer at 150 rpm and 22 °C. Samples were collected at the start of the  
1083 assay and at one-hour time points after 4 h of starvation. Percentage of cell adhesion plotted  
1084 over time. (C) EDTA resistant cell-cell adhesion, (D) EDTA sensitive cell-cell adhesion.  
1085 Level of significance is indicated as \* $p < 0.05$ , \*\* $p < 0.01$ , \*\*\* $p < 0.001$ , and \*\*\*\* $p < 0.0001$ .

1086 **Fig 18. Rescue of delay by added wild-type cells.** Wild-type AX2 and *tert* KO were  
1087 reconstituted at 1:9, 2:8 and 1:1 ratio. Developmental delay of *tert* KO was rescued by AX2  
1088 at 1:1 ratio. Scale bar- 0.5 mm.

1089 **Fig 19. Polyphosphate levels were low in the *tert* KO.** Polyphosphate levels in conditioned  
1090 media of AX2 and *tert* KO. Level of significance is indicated as \* $p < 0.05$ , \*\* $p < 0.01$ ,  
1091 \*\*\* $p < 0.001$ , and \*\*\*\* $p < 0.0001$ .

1092 **Fig 20. Some of the possible targets of *tert*/TERT in development of *D. discoideum*, as**  
1093 **indicated by this study.** This work, the first functional study of a telomerase in  
1094 *Dictyostelium*, revealed that TERT influenced many previously reported developmental  
1095 processes and pathways. The dashed lines represent effects previously unreported, involving  
1096 multiples phases of the life-cycle. Adenosine, however, was found to provide negative  
1097 feedback on *tert* expression. The depictions of life-cycle changes were drawn by the authors,  
1098 based on images in [102], and adapted by kind permission of the Journal of Cell Science.

1099

## 1100 **Supporting information**

1101 **S1 Fig. Schematic representation of the different functional domains of TERT identified**  
1102 **with SMART analysis.** TERT protein contains the following domains: reverse transcriptase  
1103 and RNA binding domain.

1104 **S2 Fig. Telomerase activity assay.** TRAP assay was performed for AX2 and *tert* KO.

1105 Human cell lines HEK and HeLa were used as positive controls.

1106 **S3 Fig. Changing cell density and its effect on development.** Development assay at

1107 different cell density ( $2 \times 10^4$  cells/cm<sup>2</sup> to  $2 \times 10^6$  cells/cm<sup>2</sup>). AX2 cells aggregate even at a cell

1108 density below  $2 \times 10^4$  cells/cm<sup>2</sup>, but *tert* KO fails to aggregate at such a density. *Tert* KO

1109 phenotype was not rescued even at higher cell density ( $2 \times 10^6$  cells/cm<sup>2</sup>).

1110 **S4 Fig. Effect of adenosine on aggregate size in *D. discoideum*.** A) qRT-PCR of 5'NT

1111 during stream breaking. Fold change in mRNA expression is relative to AX2 at the indicated

1112 time points. *rnlA* is used as mRNA amplification control. B) Quantification of adenosine

1113 levels during stream breaking. Level of significance is indicated as \* $p < 0.05$ , \*\* $p < 0.01$ ,

1114 \*\*\* $p < 0.001$ , and \*\*\*\* $p < 0.0001$ .

1115 **S5 Fig. *Tert* levels in adenosine treated cells.**

1116 **S6 Fig. Quantification of iron.** Iron levels were quantified by ICP-MS. Level of significance

1117 is indicated as \* $p < 0.05$ , \*\* $p < 0.01$ , \*\*\* $p < 0.001$ , and \*\*\*\* $p < 0.0001$ .

1118 **S1 Table.** Primers used for TERT overexpression vector construction.

1119 **S2 Table.** Primers used for real-time PCR.

1120 **Video 1.** Timelapse video of AX2 development.

1121 **Video 2.** Timelapse video of *tert* KO development.

1122 **Video 3.** Timelapse video of *tert* KO (*act15/gfp::tert*) development.

1123 **Video 4.** Timelapse video of cAMP wave propagation in AX2.

1124 **Video 5.** Timelapse video of cAMP wave propagation in *tert* KO.

1125

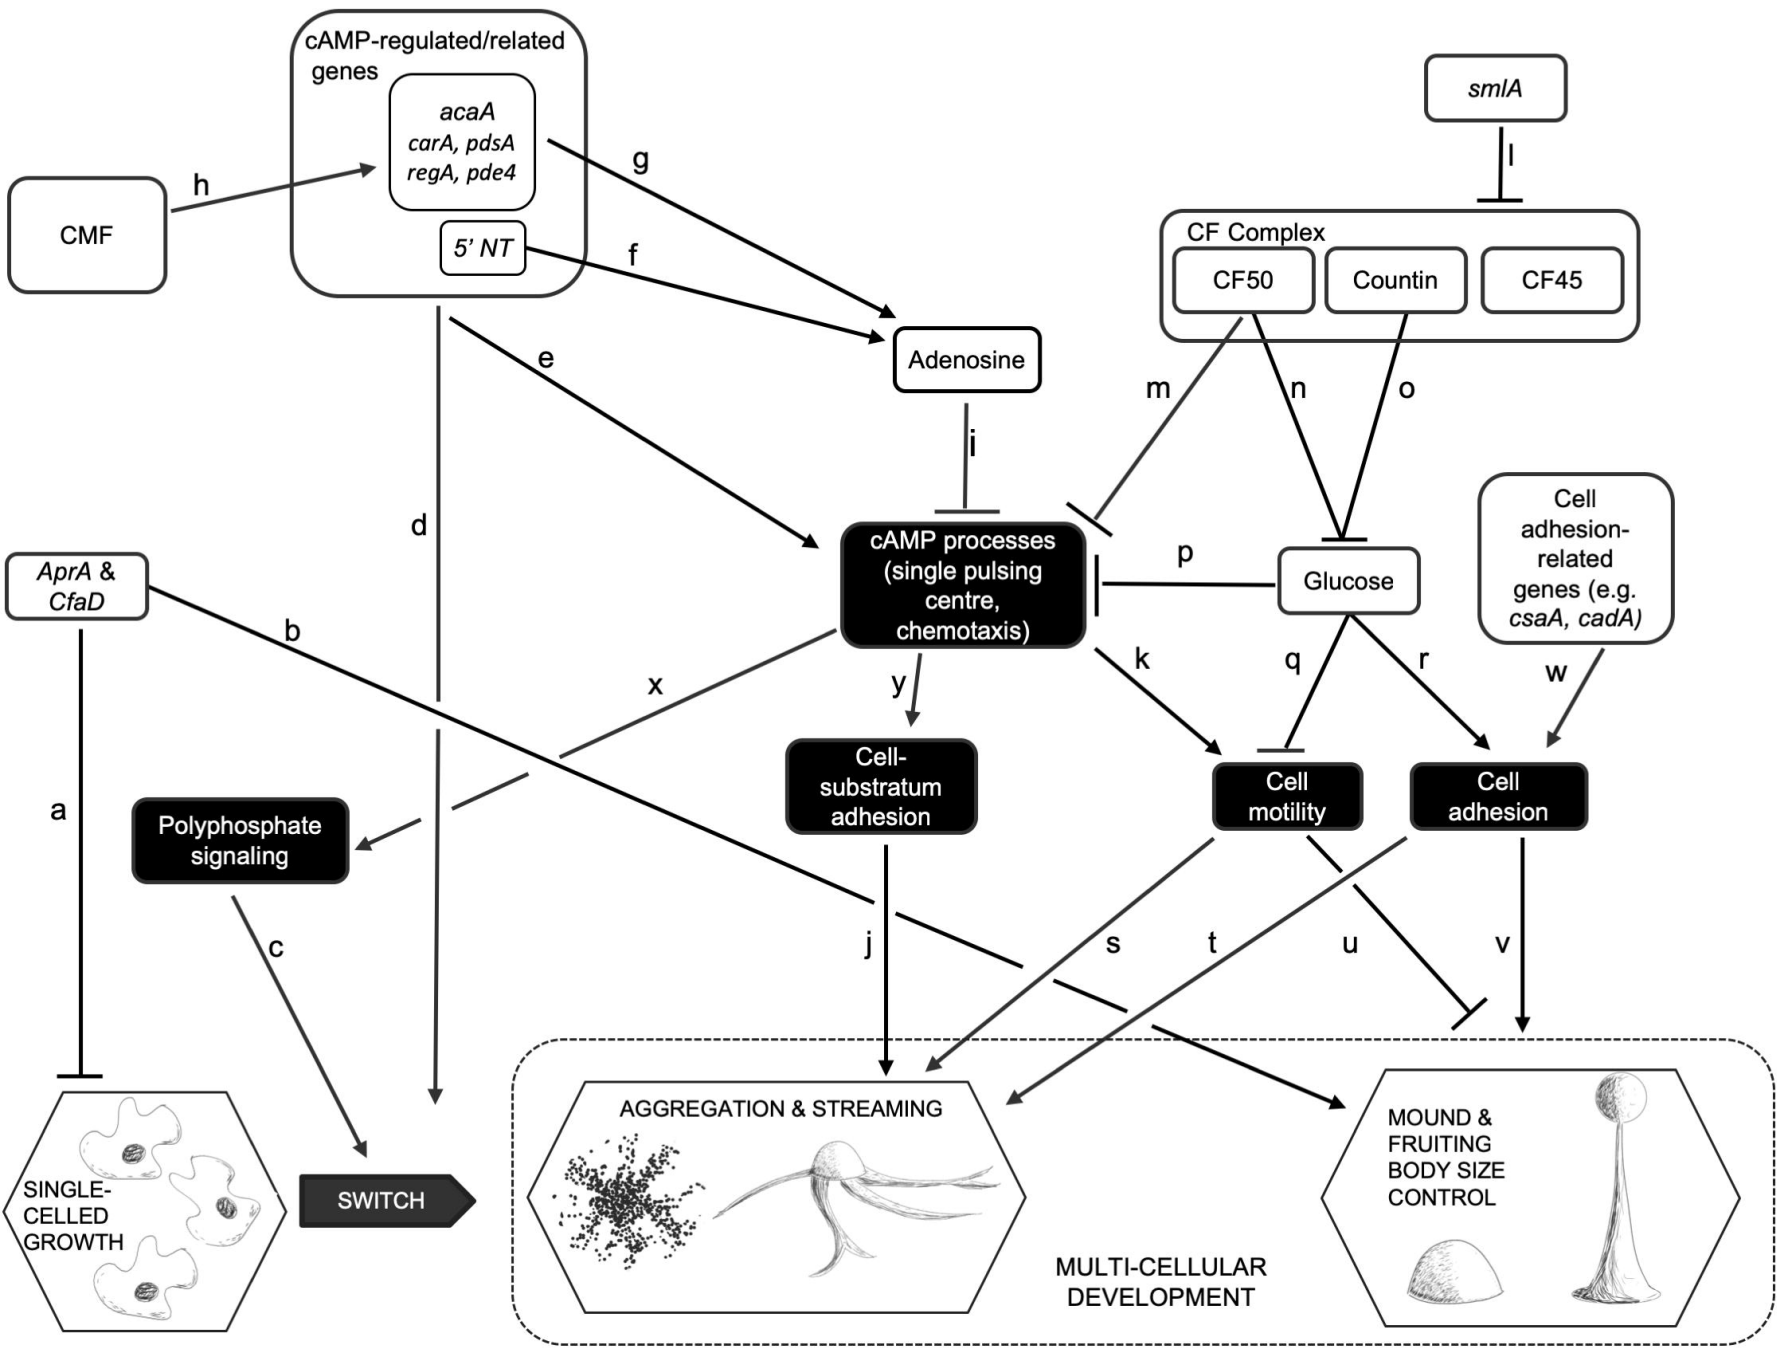

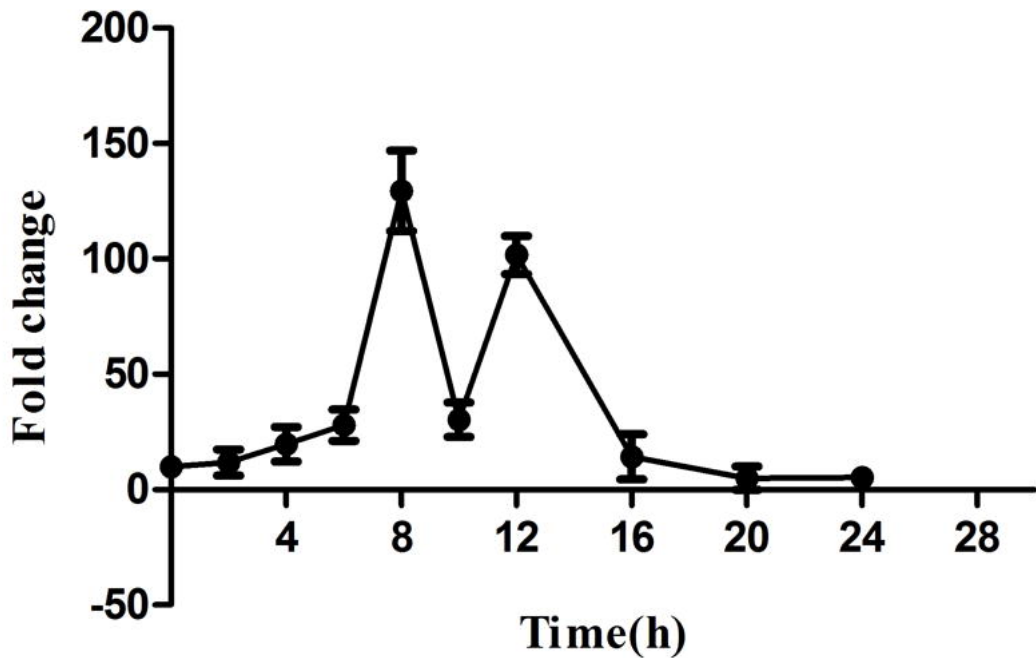

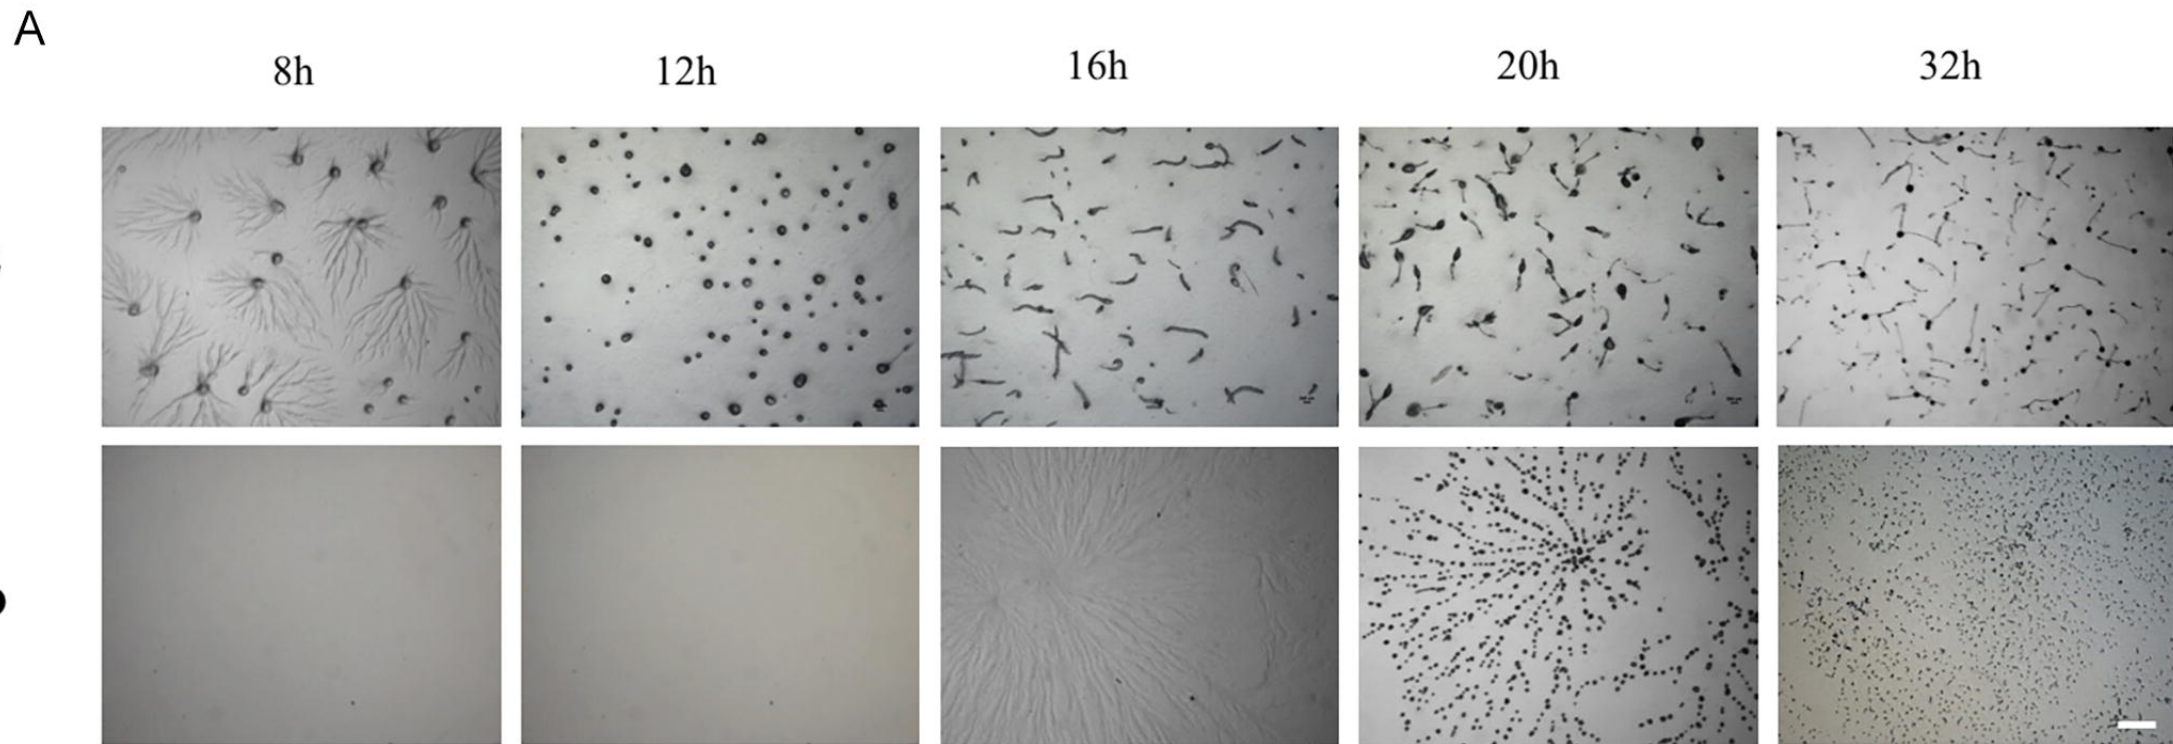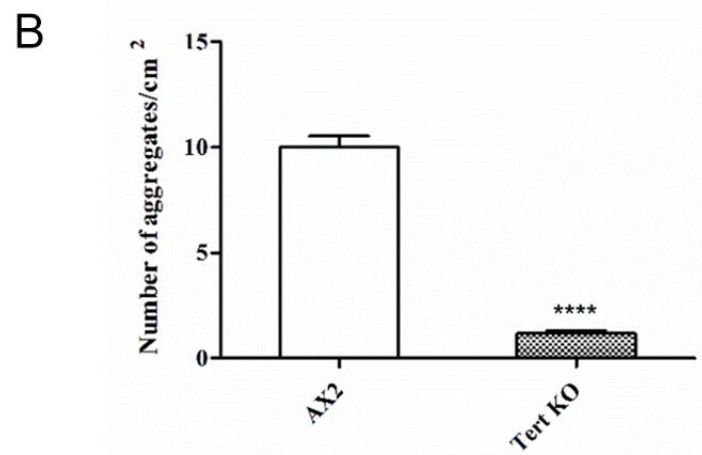



**A**

8h

12h

AX2[act15/gfp::tert]

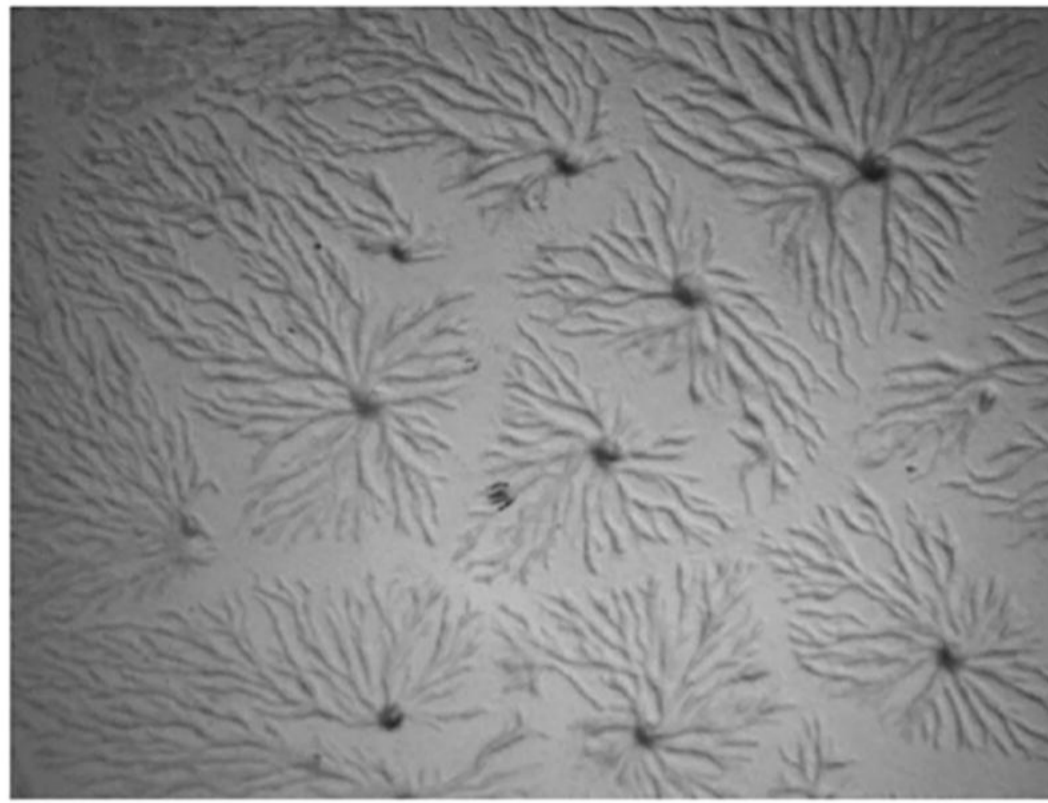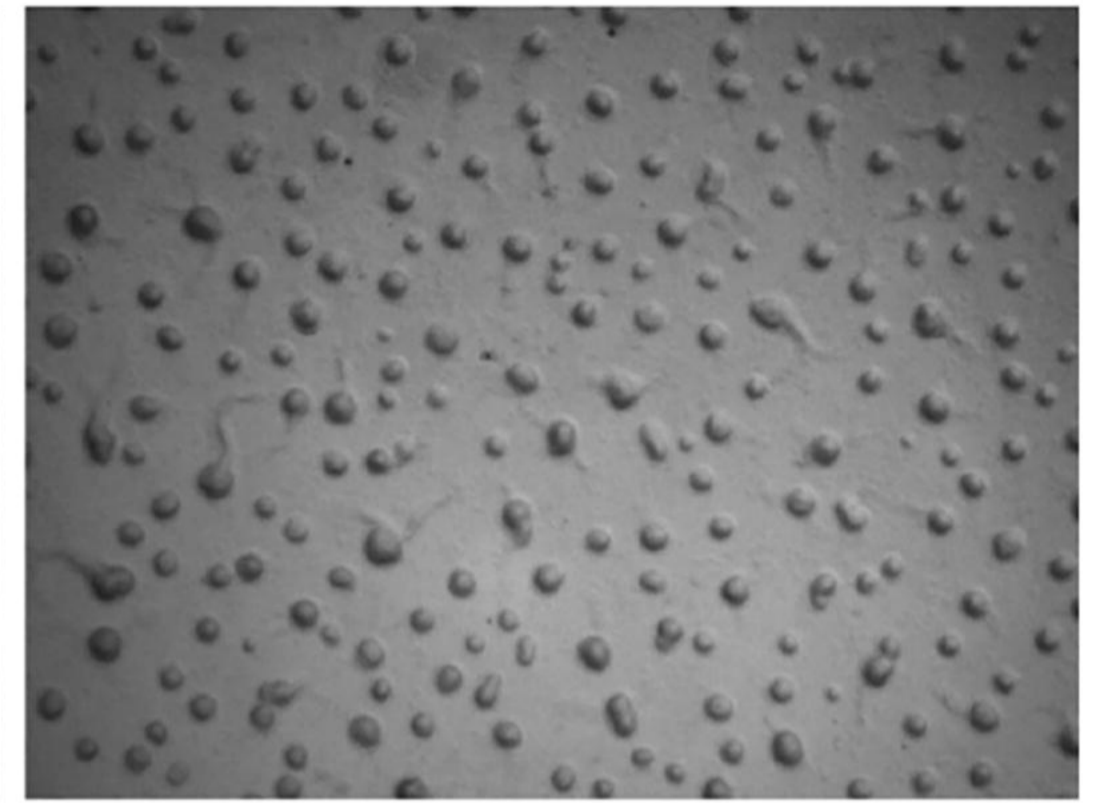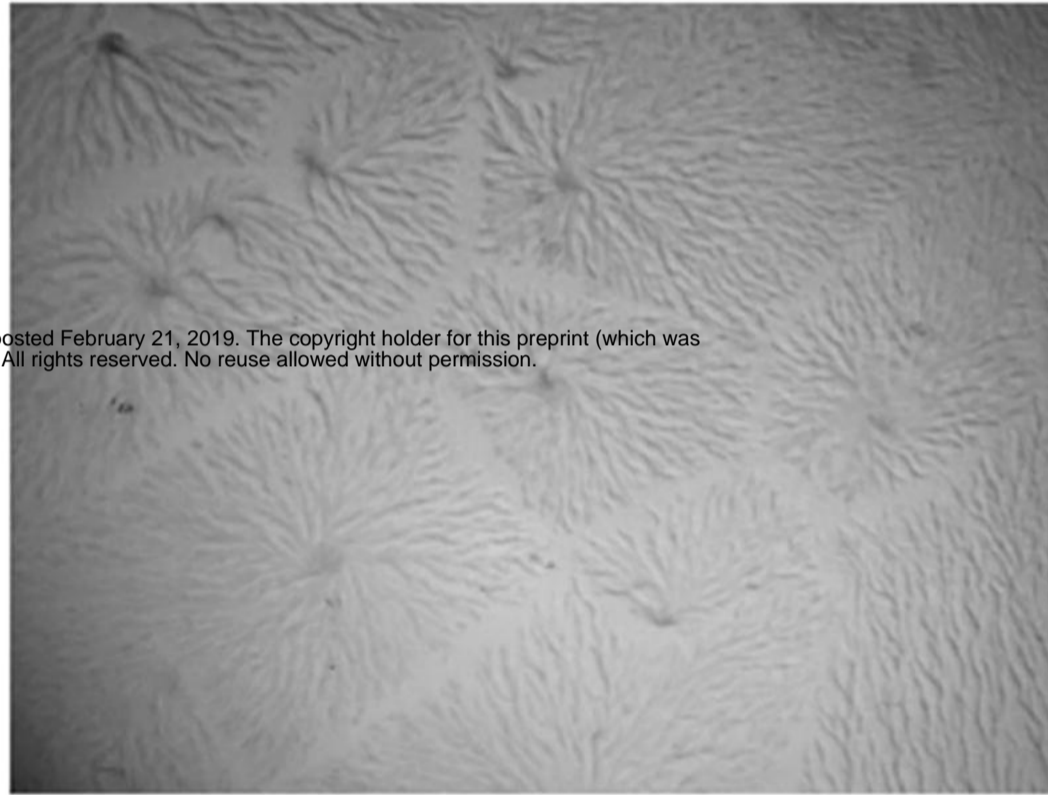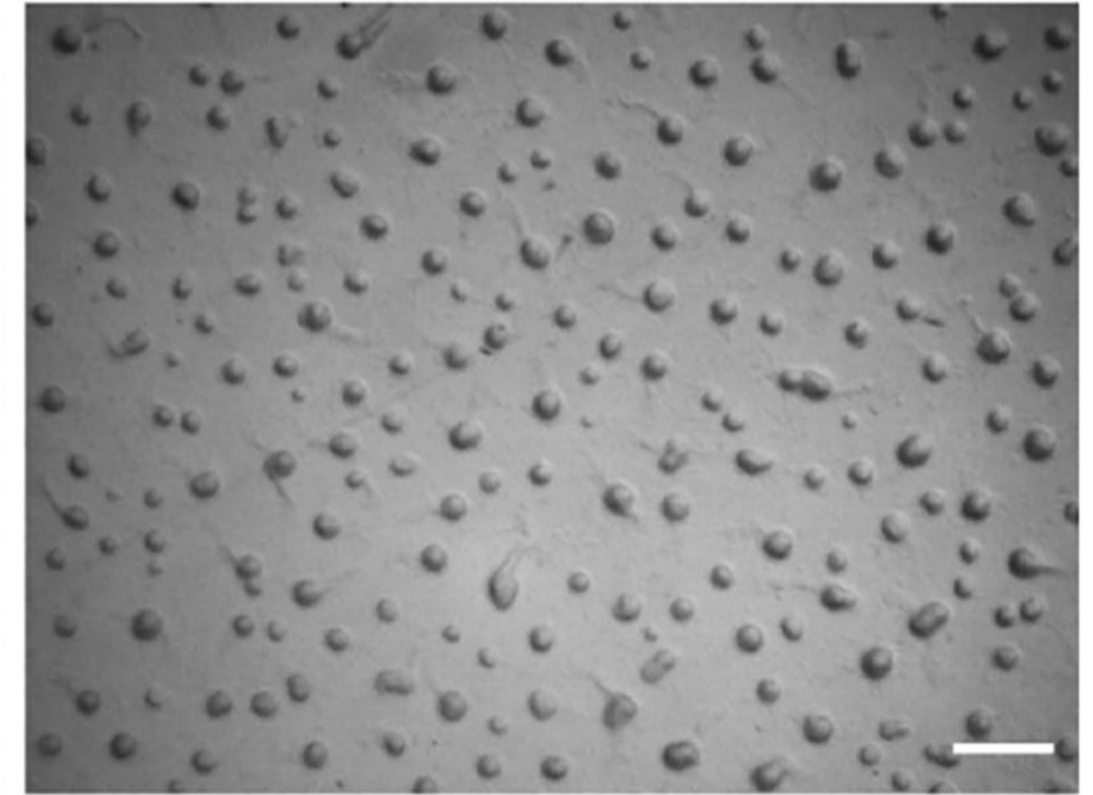

bioRxiv preprint doi: <https://doi.org/10.1101/556977>; this version posted February 21, 2019. The copyright holder for this preprint (which was not certified by peer review) is the author/funder. All rights reserved. No reuse allowed without permission.

*tert* KO[act15/gfp::tert]**B**

8h

12h

16h

20h

32h

**AX2**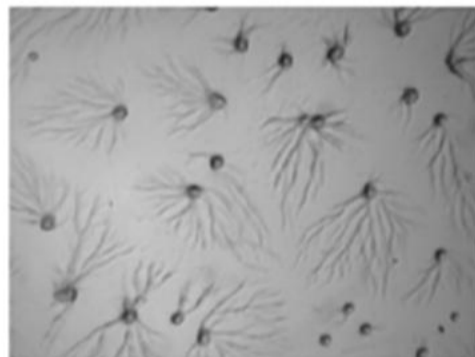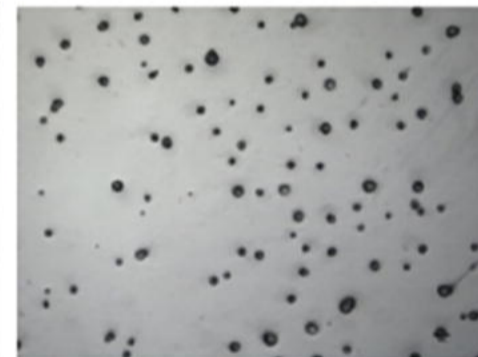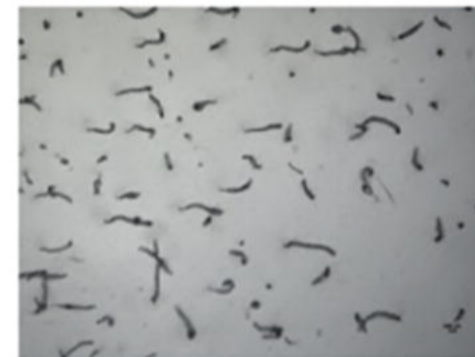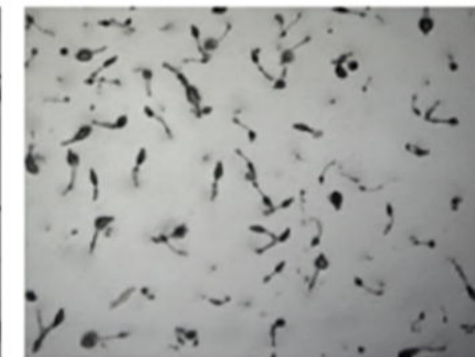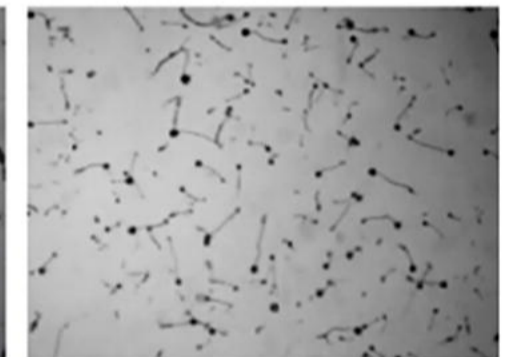**AX2+  
100nM  
BIBR**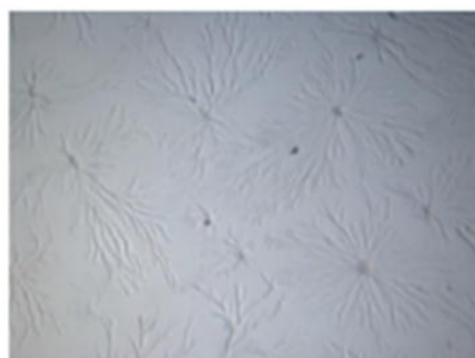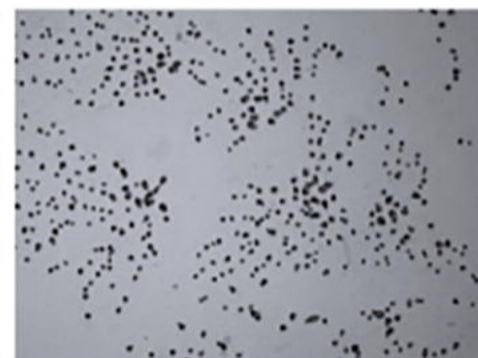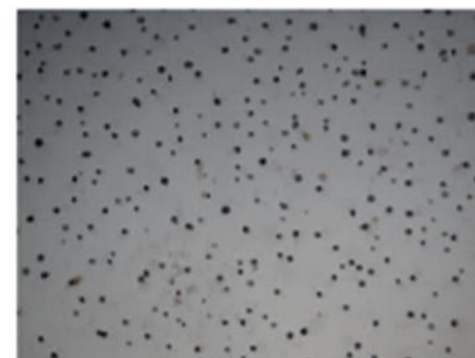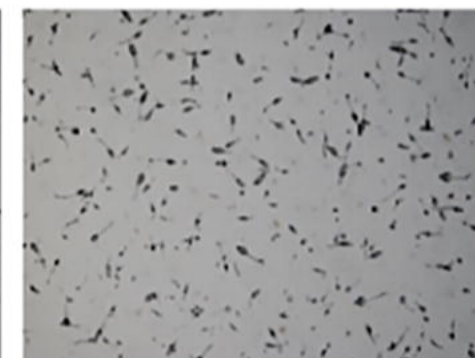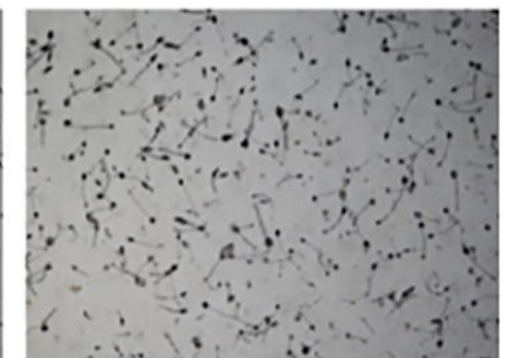**AX2+  
250nM  
MST 312**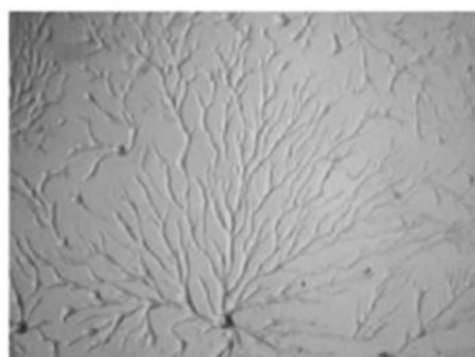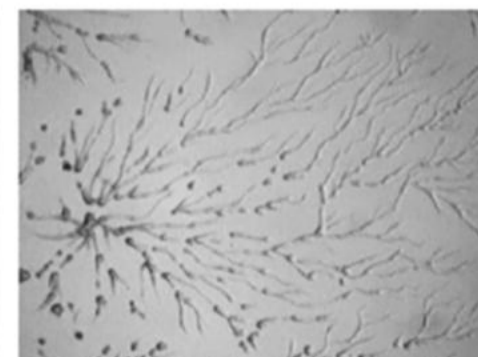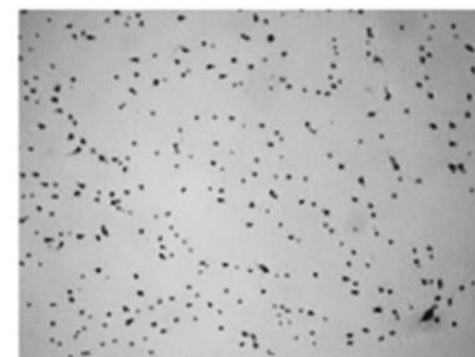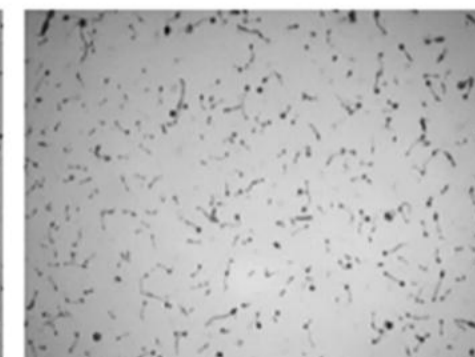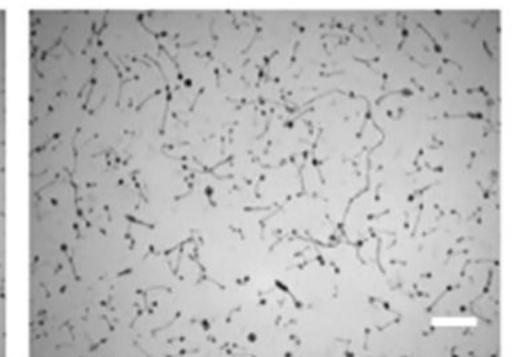



**A**

qRT PCR of countin during aggregation

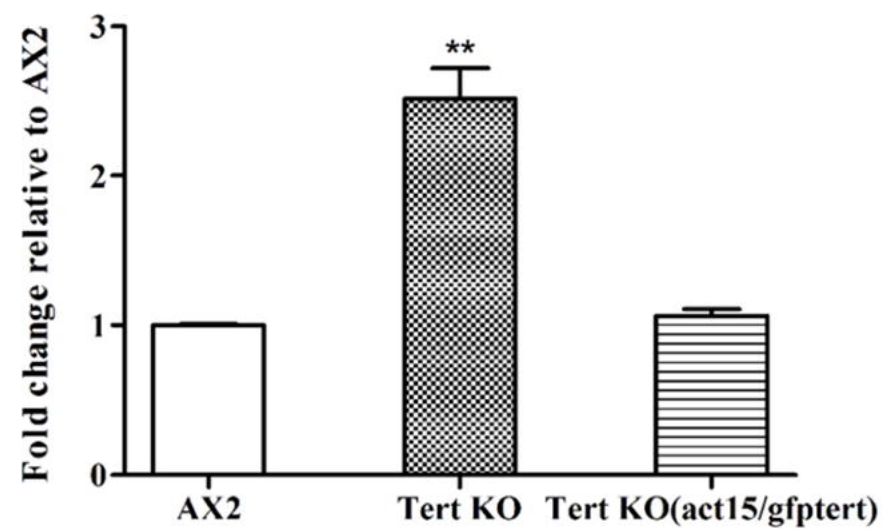**B**

qRT PCR of smlA during aggregation

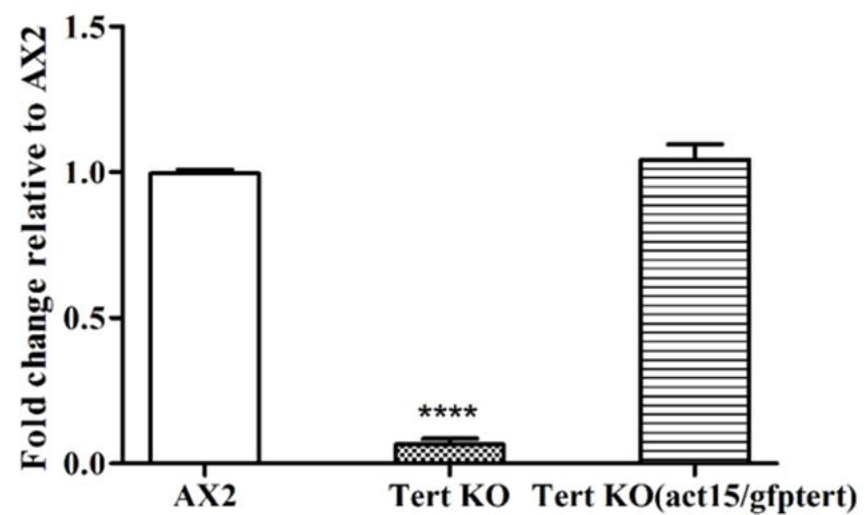**C**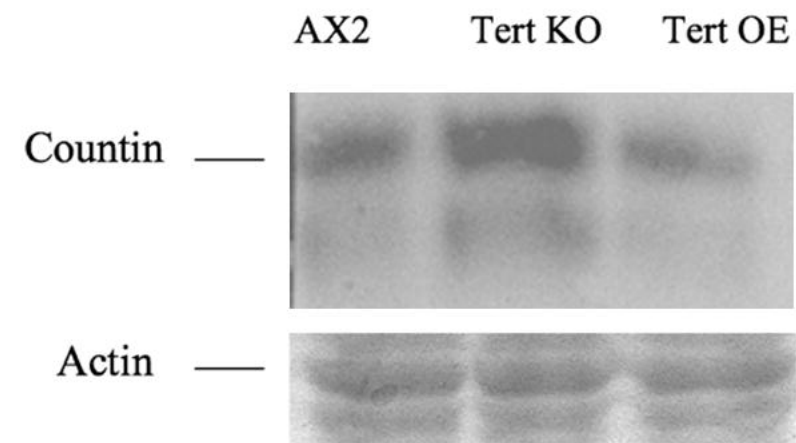**D***tert* KO*tert* KO+  
anti-countin*tert* KO+  
anti-CF50*tert* KO+  
anti-CF45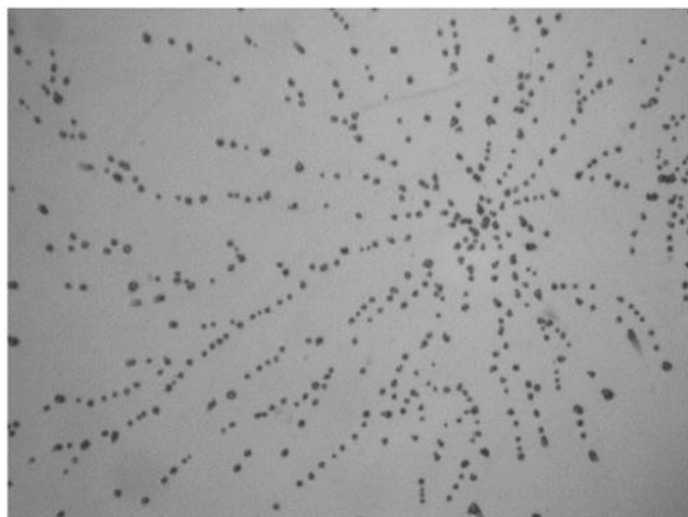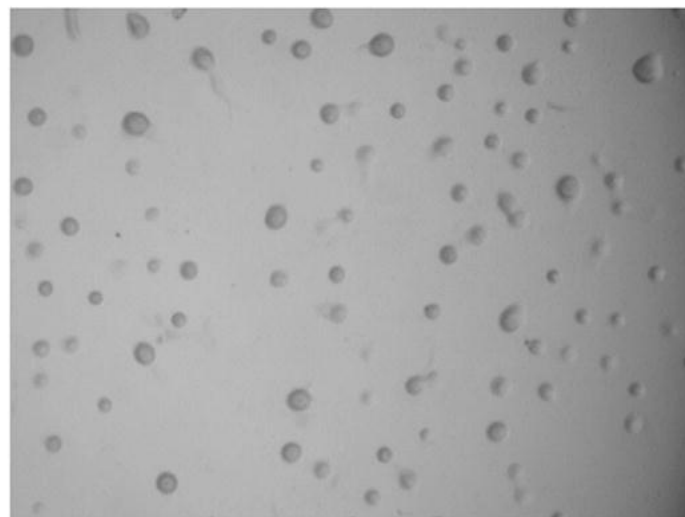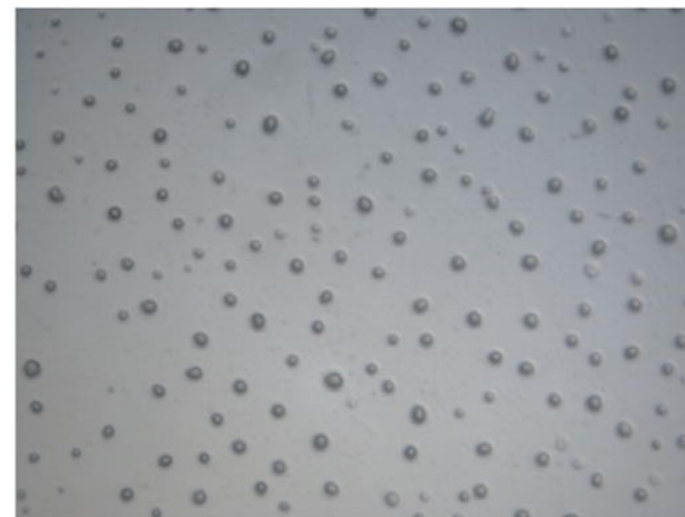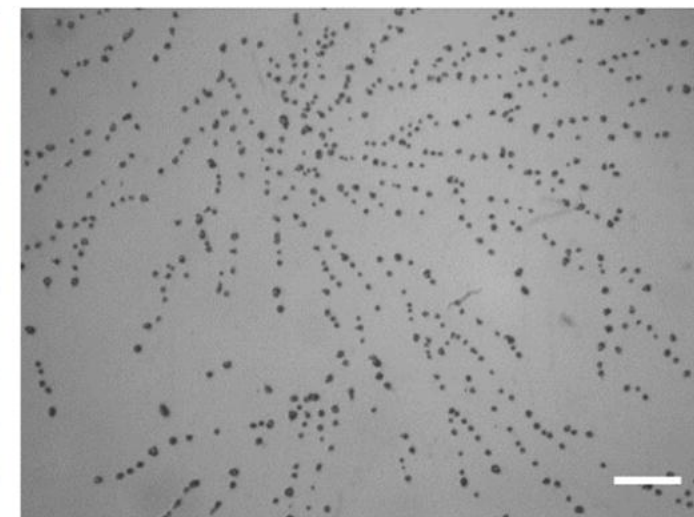

**A** bioRxiv preprint doi: <https://doi.org/10.1101/556977>; this version posted February 21, 2019. The copyright holder for this preprint (which was not certified by peer review) is the author/funder. All rights reserved. No reuse allowed without permission.

*Countin* KO

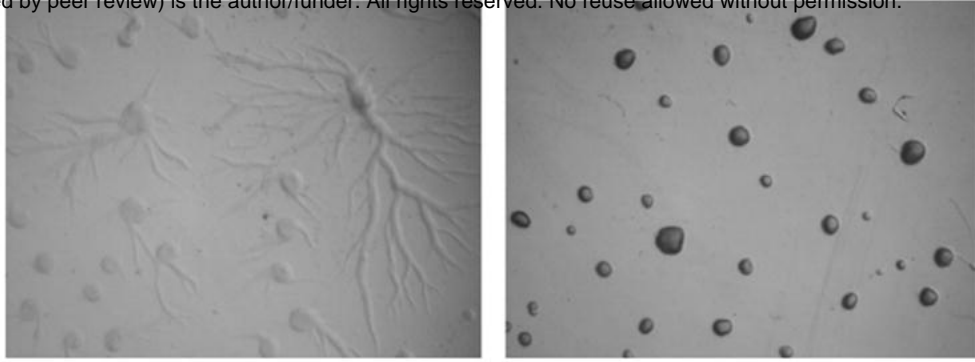

*Countin* KO+  
*Tert* KO CM

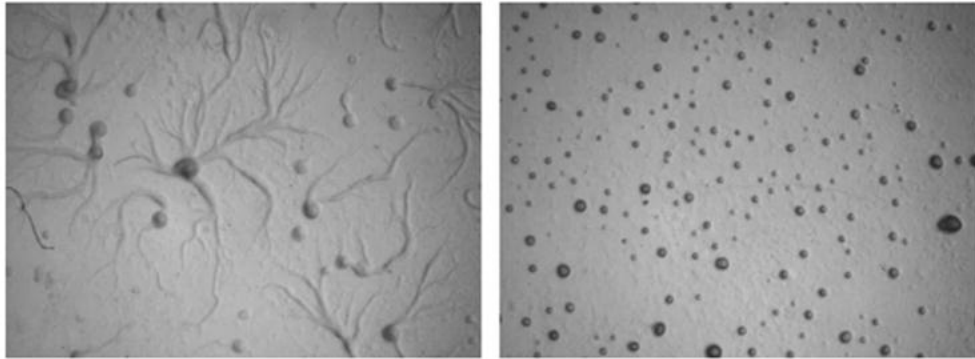

*Tert* KO+  
*Countin* KO CM

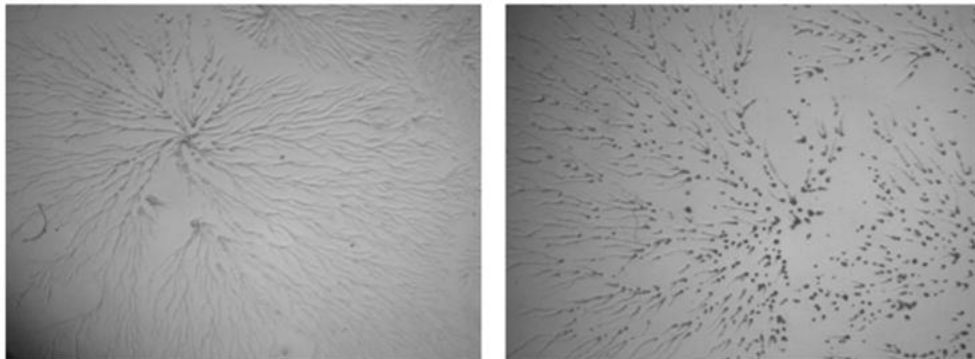

*Countin* KO+  
100nM BIBR

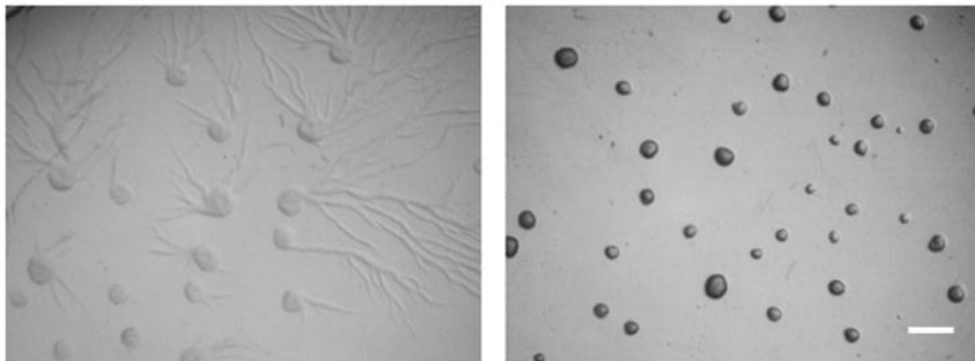

**B**

AX2/AX2 CM

8h

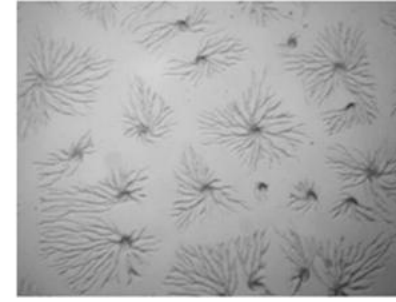

AX2/*tert* KO CM

10h

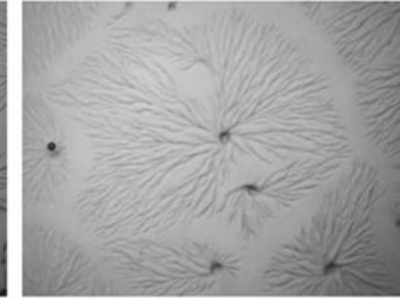

12h

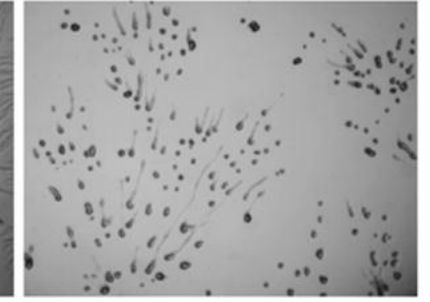

16h

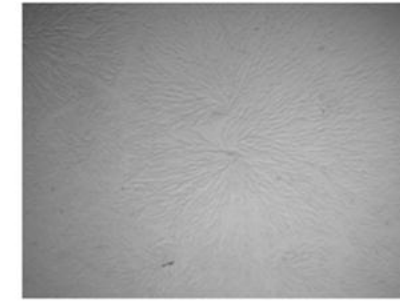

18h

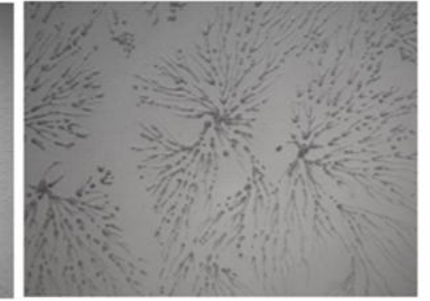

*tert* KO/AX2 CM

16h

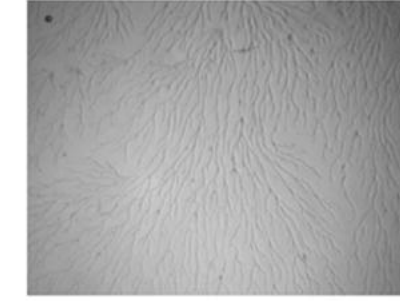

22h

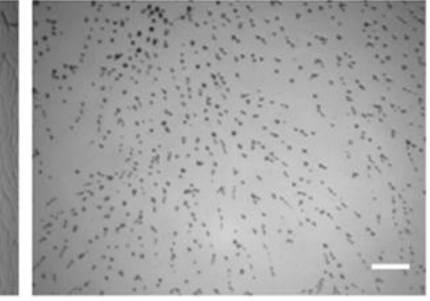

*tert* KO/*tert* KO CM

**C**

90% AX2+  
10% *Tert* KO

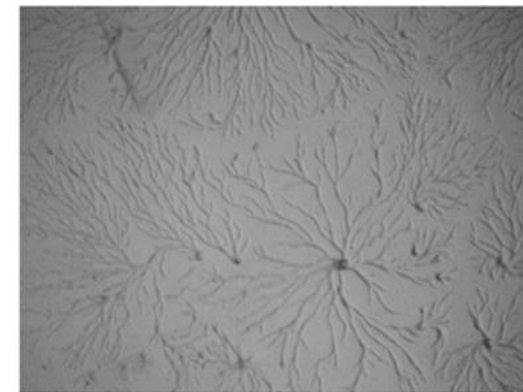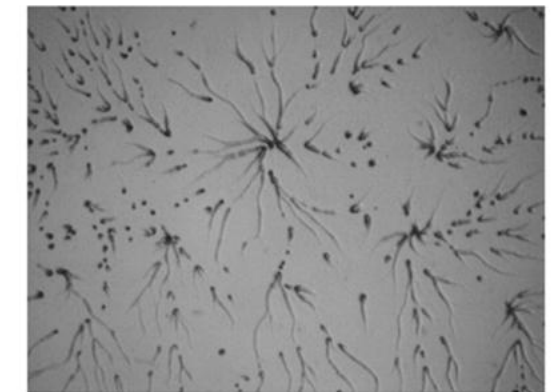

90% *Tert* KO +10%  
AX2

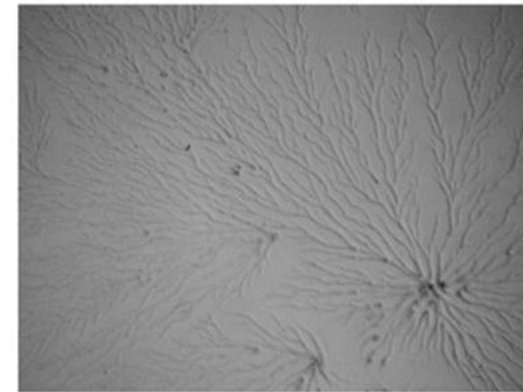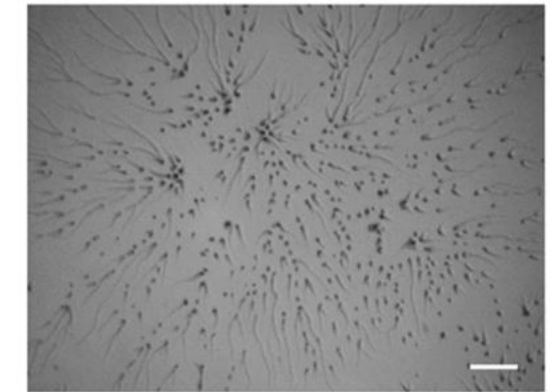



KK2 buffer

AX2 CM

Tert KO CM

*D. minutum*

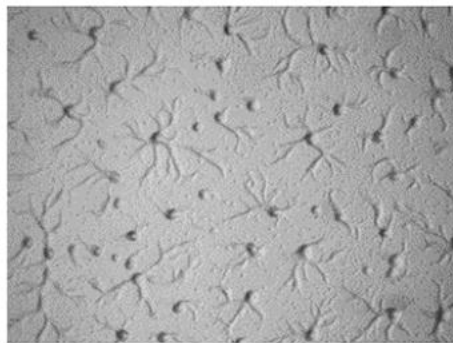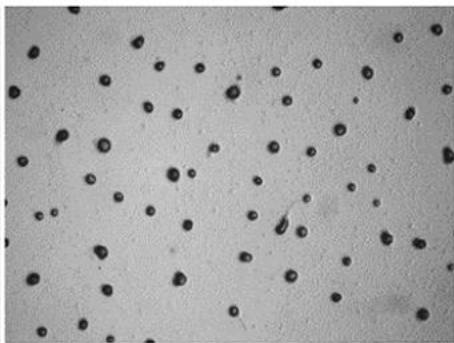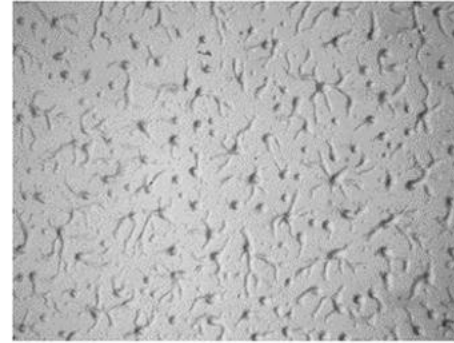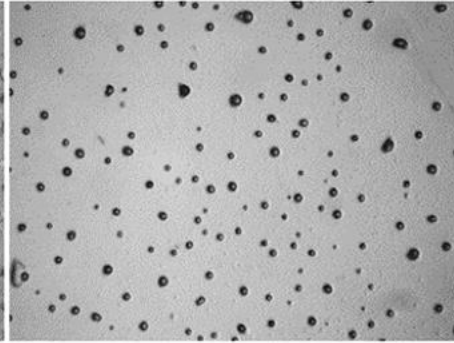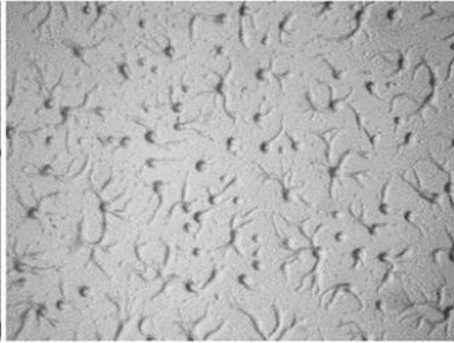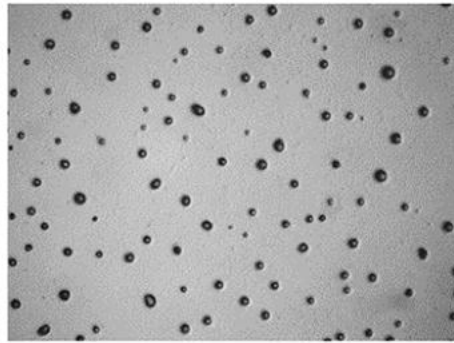

*D. purpureum*

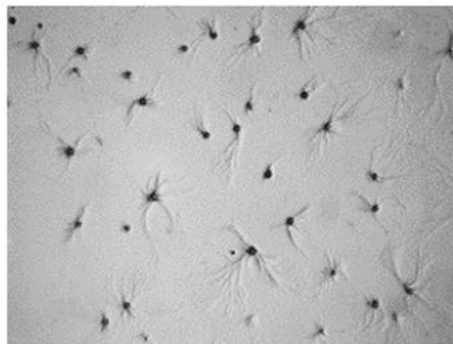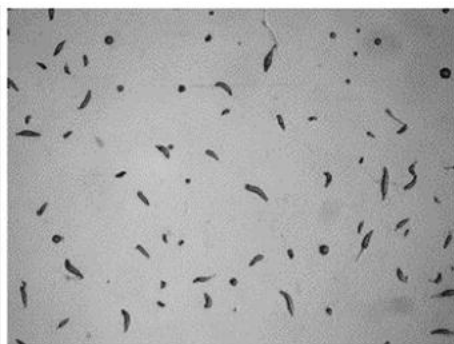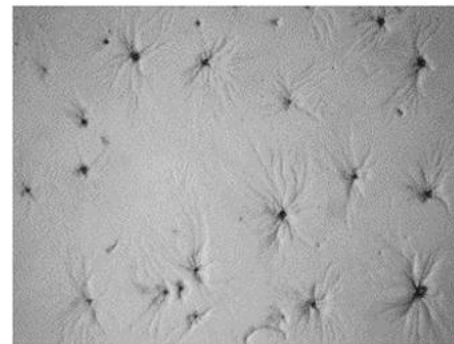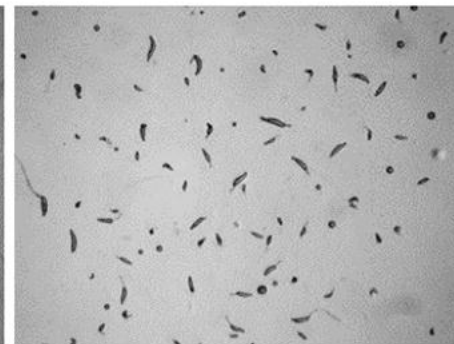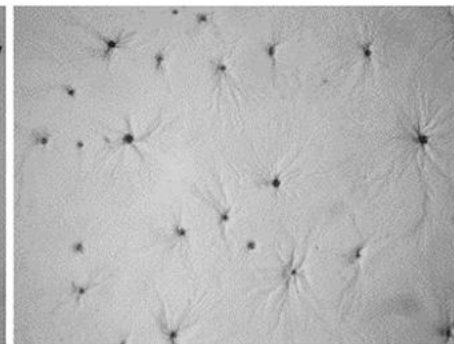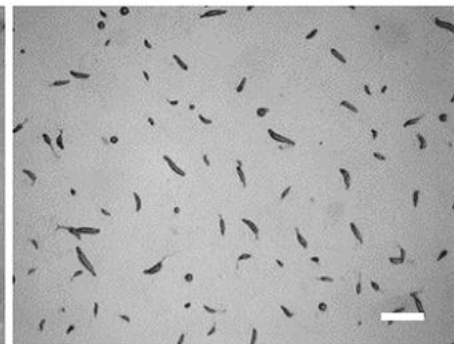

**A**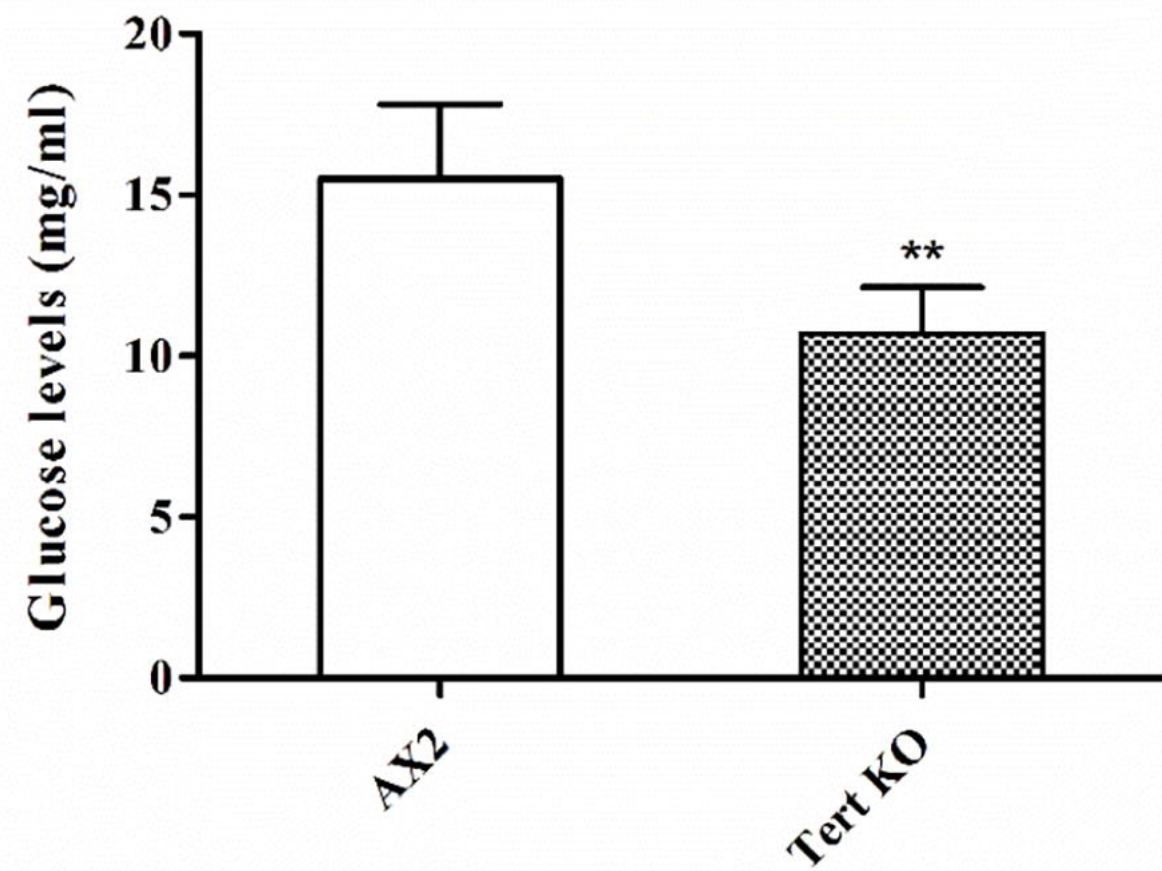**B**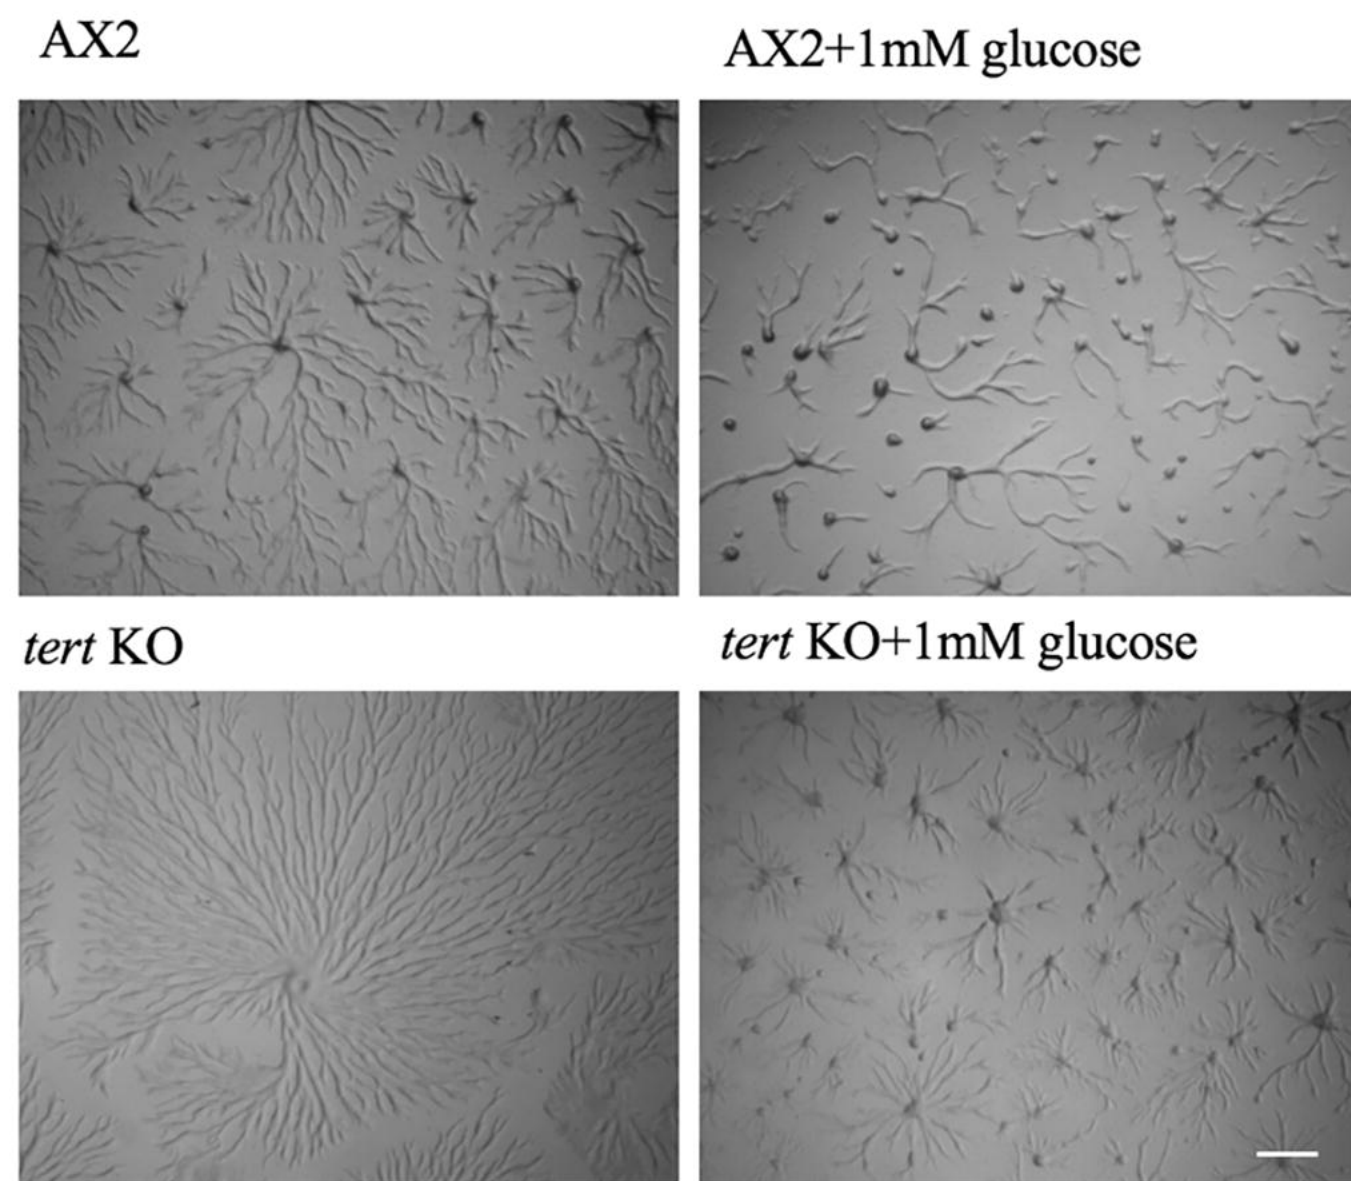

*tert* KO+  
anti- AprA

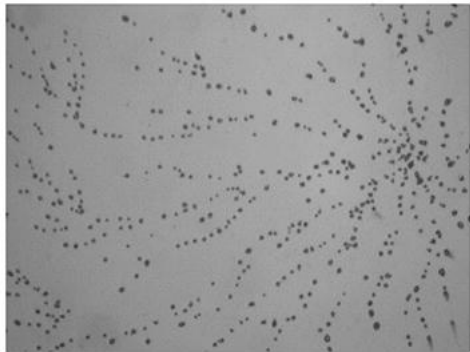

*tert* KO+  
anti- CfaD

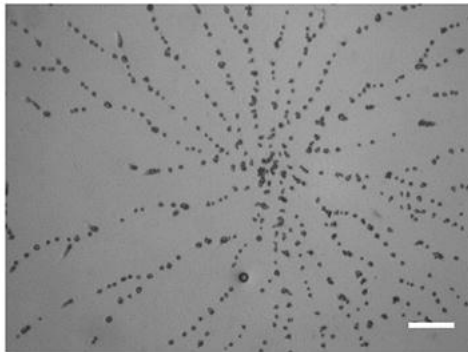

AX2

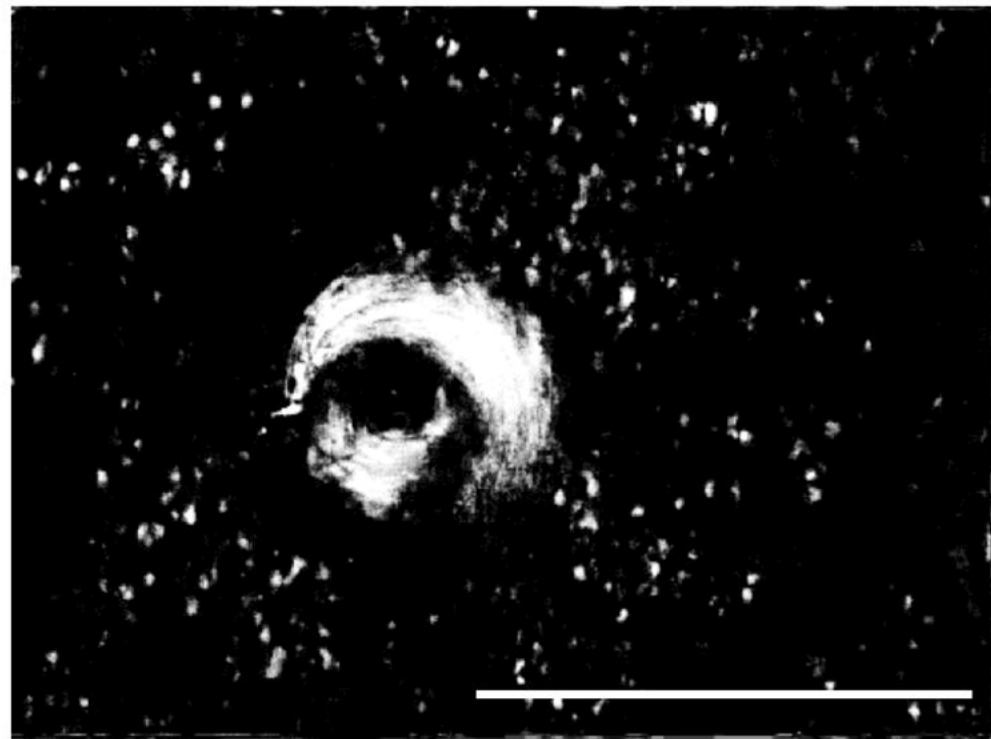

*tert* KO

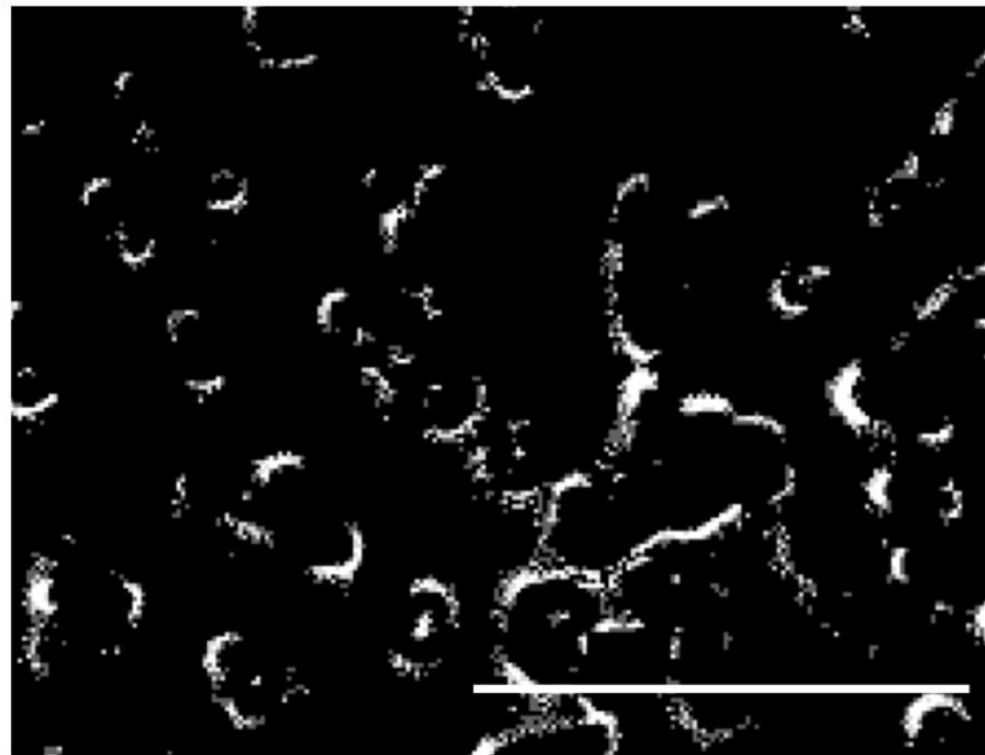

Rescue

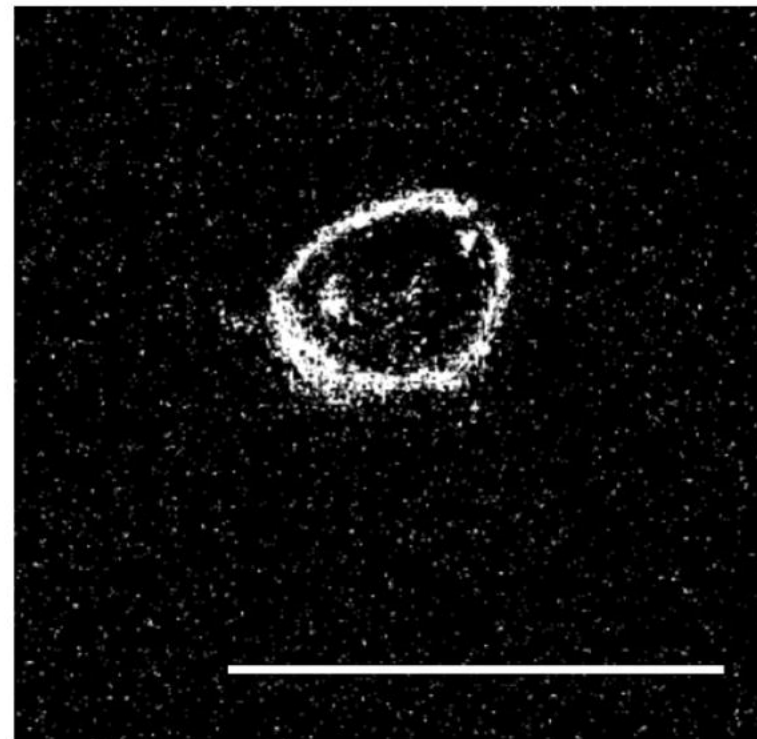

**A**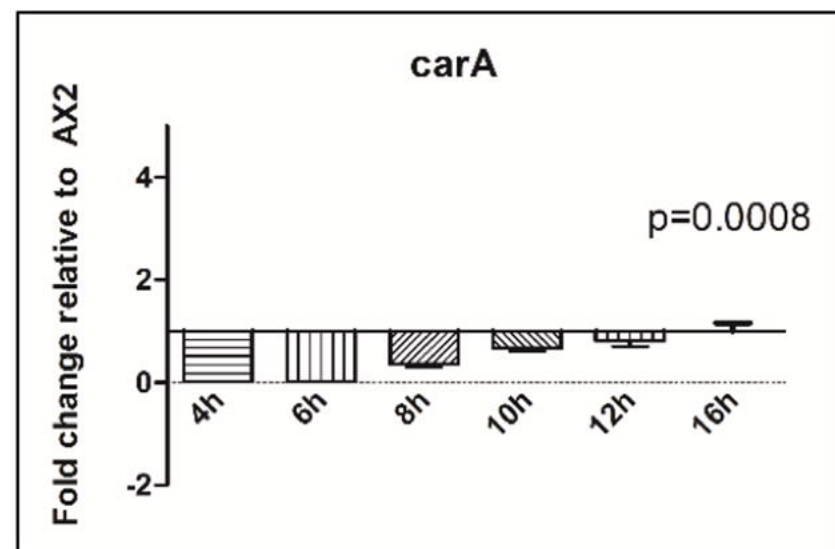**B**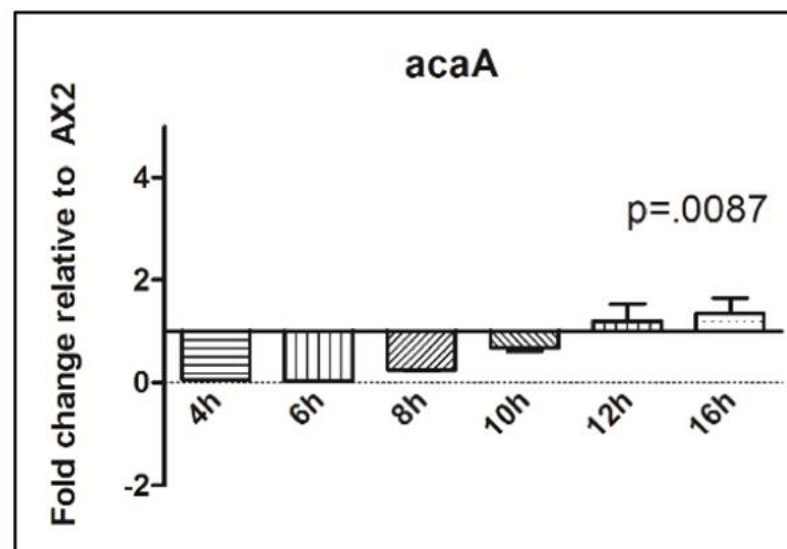**C**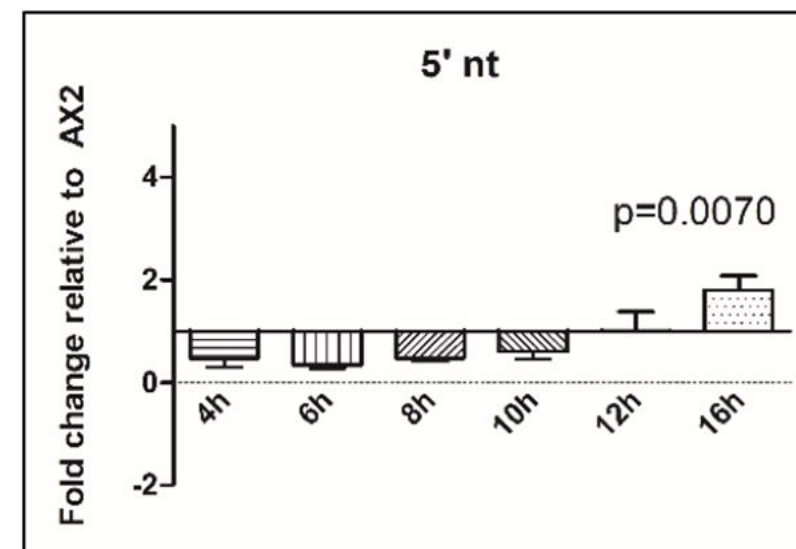**D**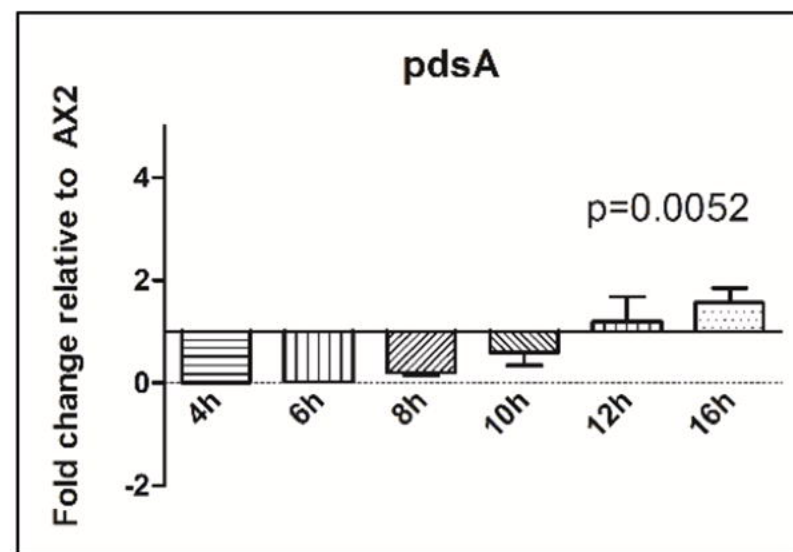**E**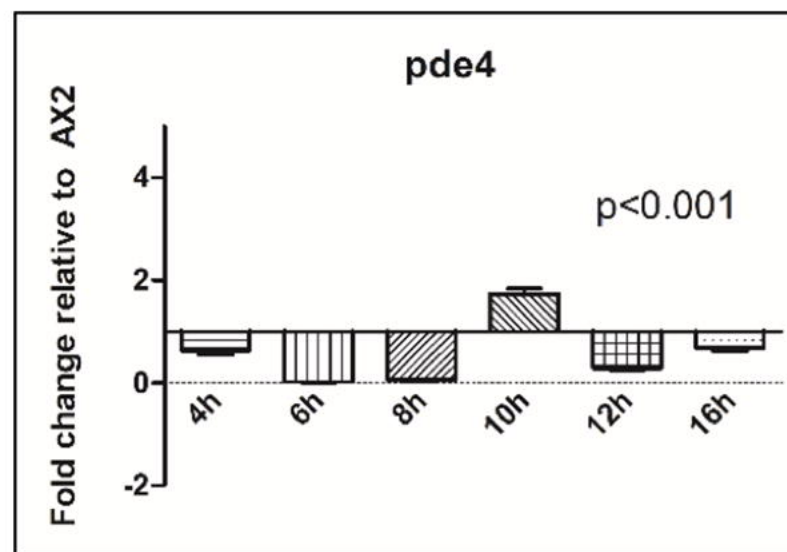**F**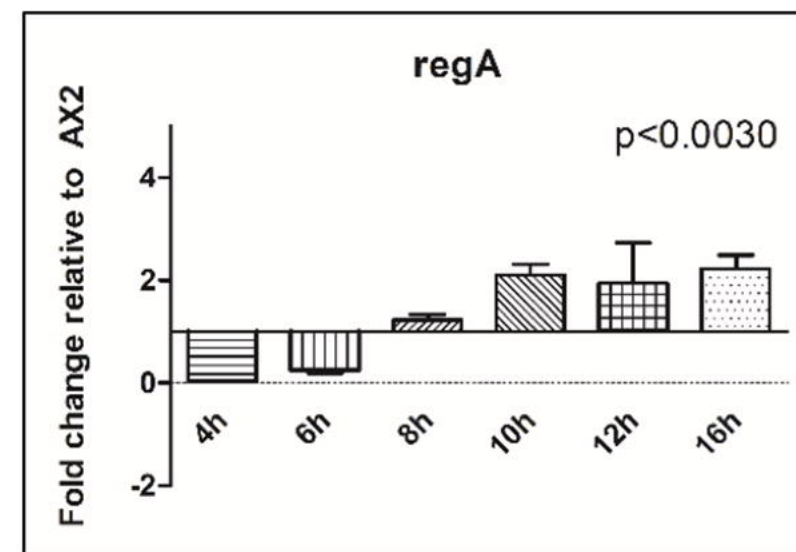



**A**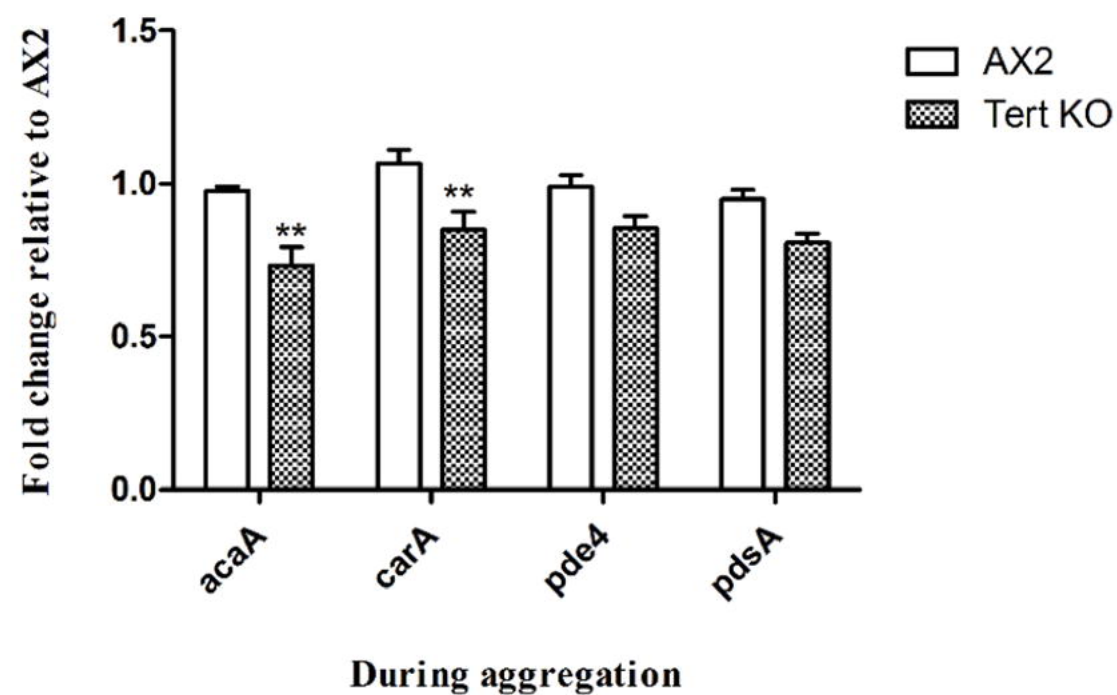**B**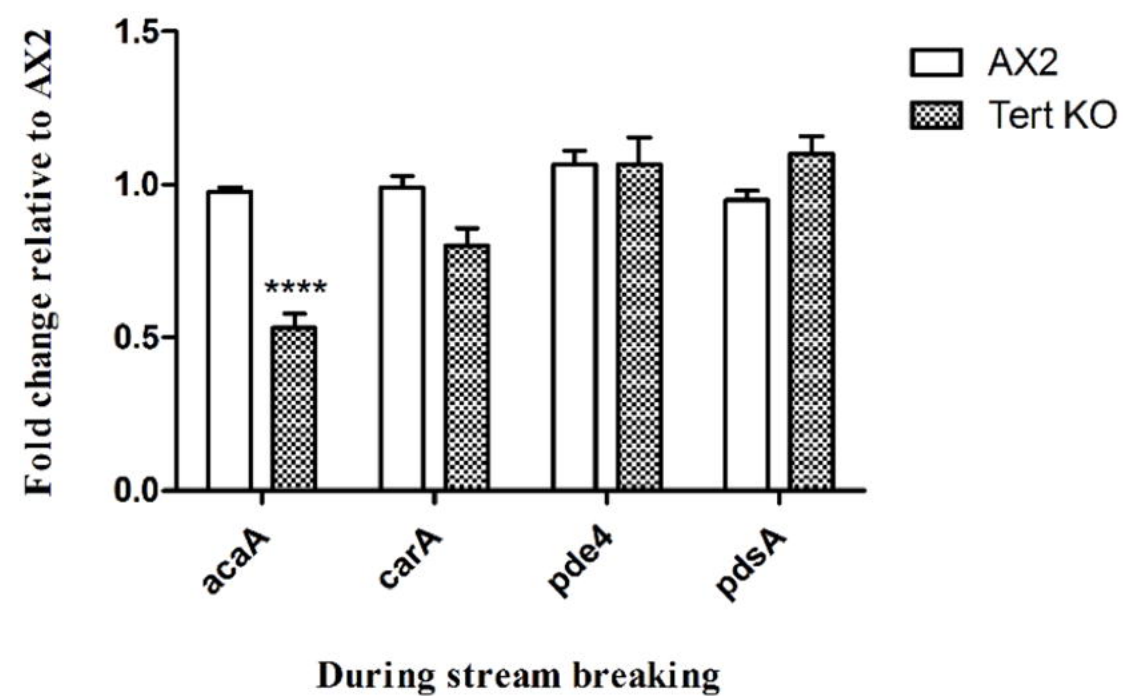**C**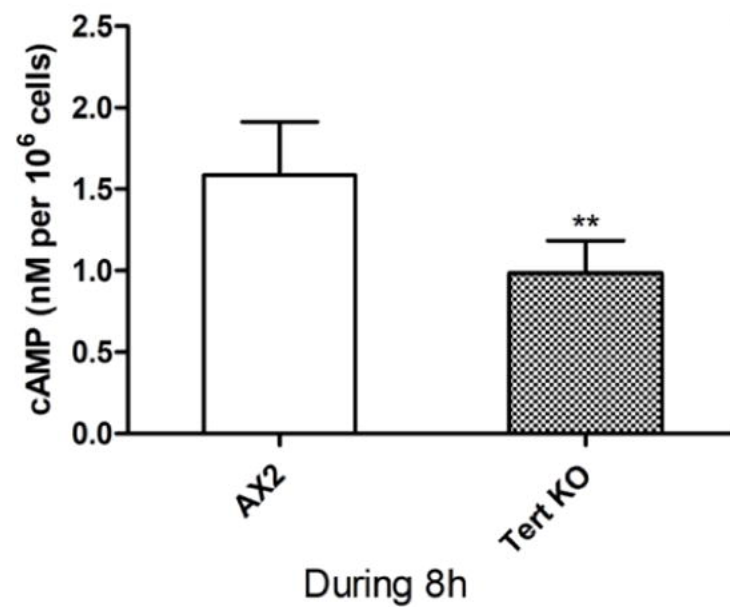**D**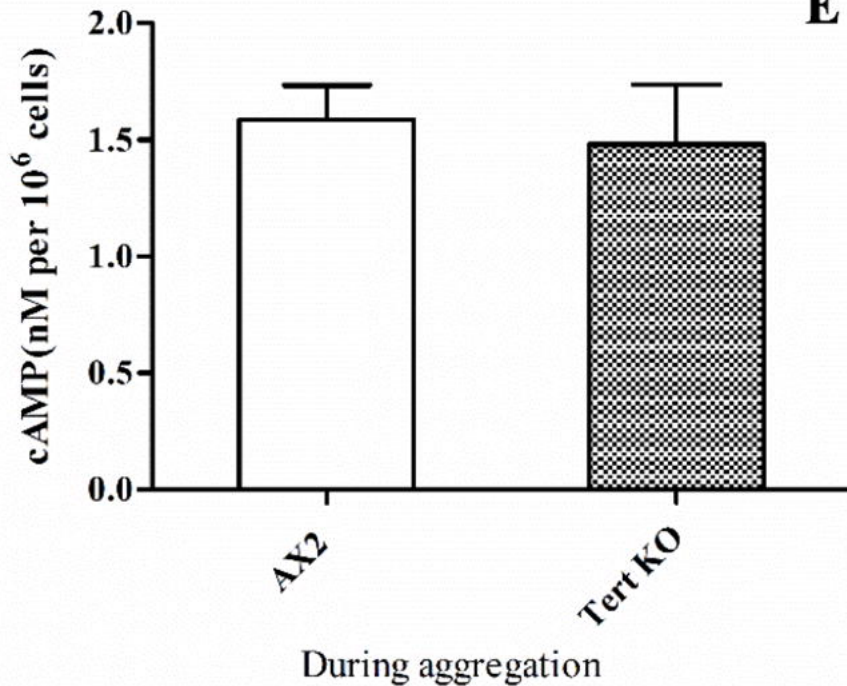**E**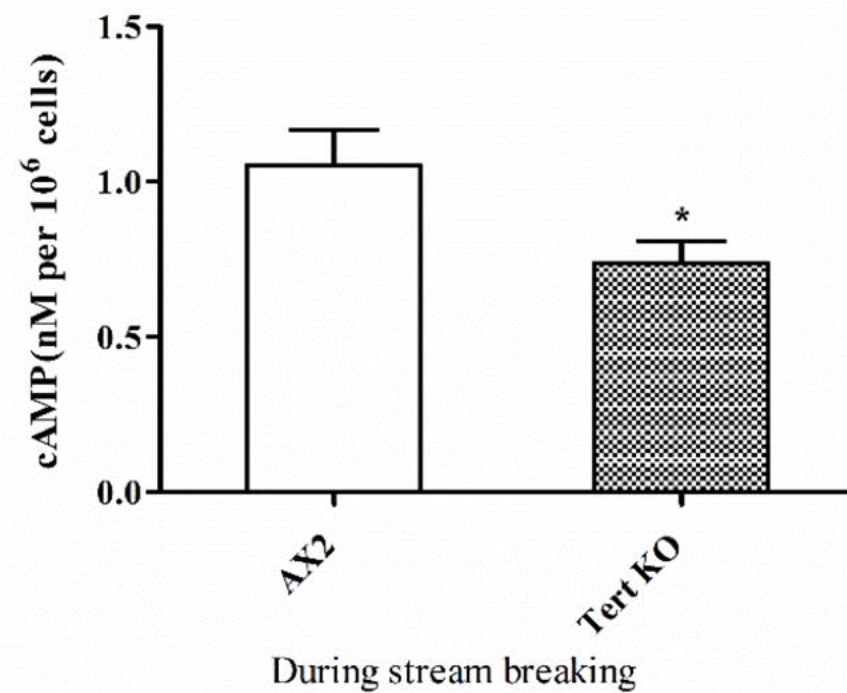

**A**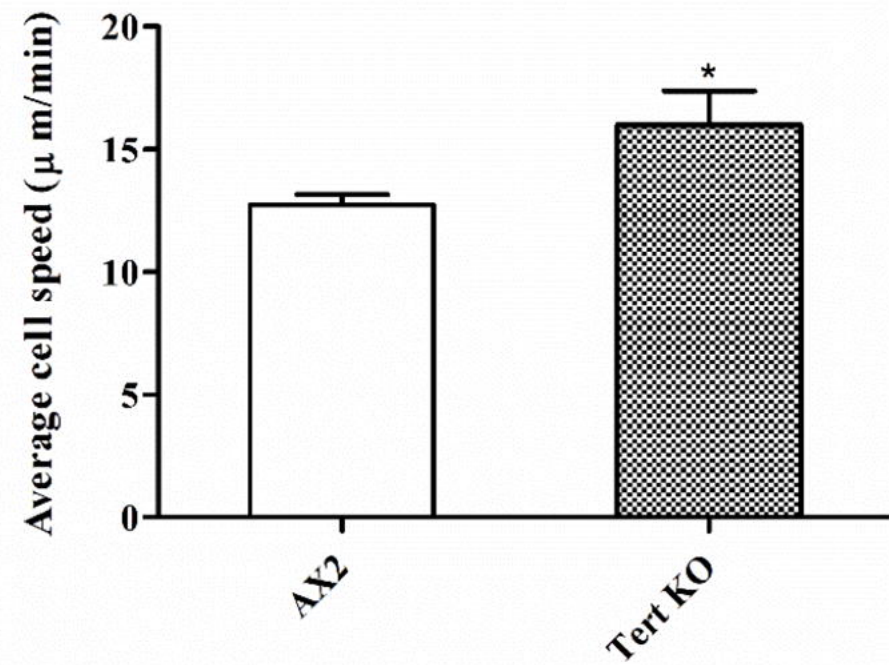**B**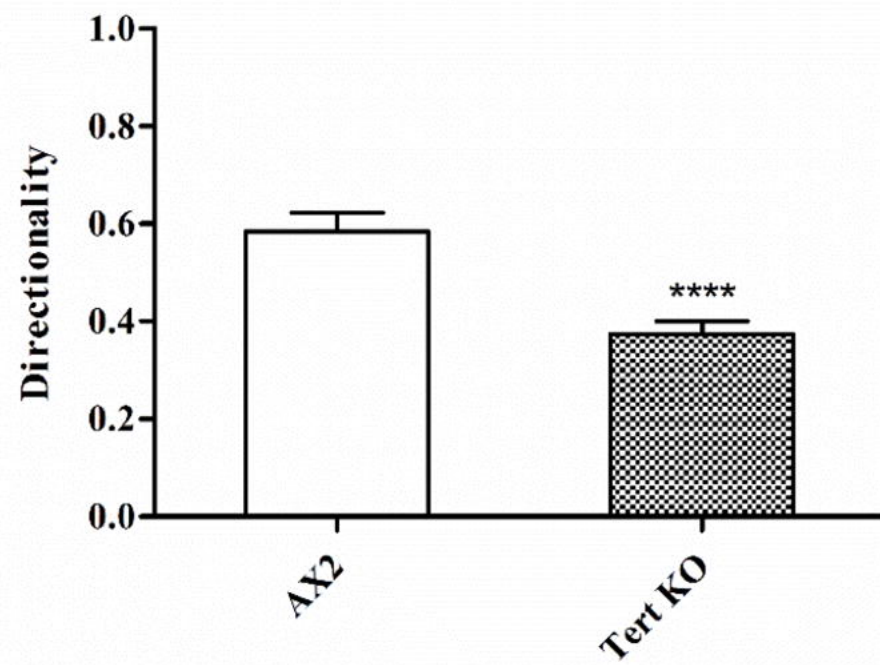**C**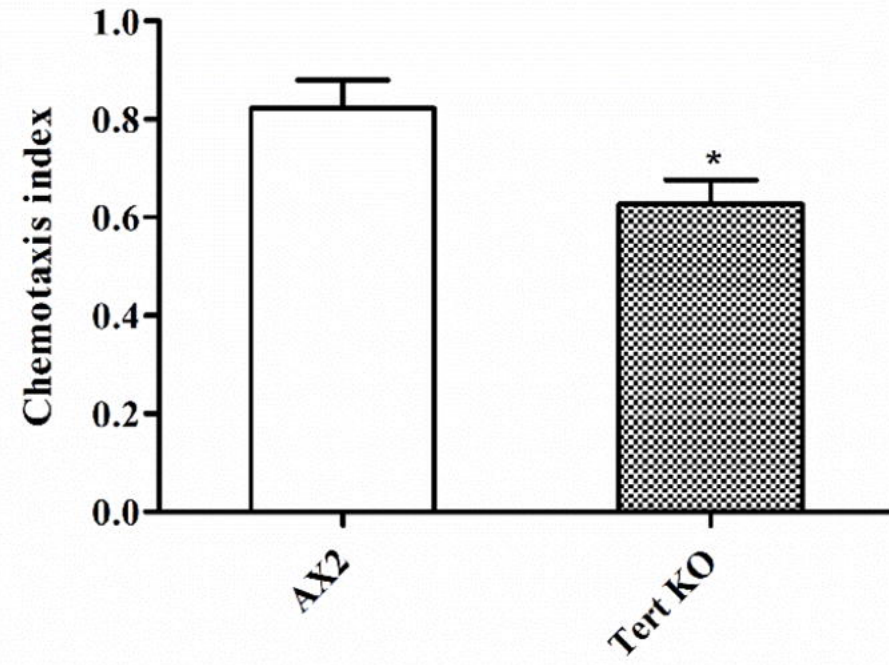



**A**

1h

4h

8h

20h

24h

AX2

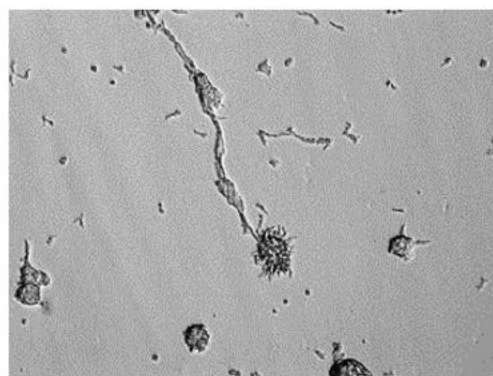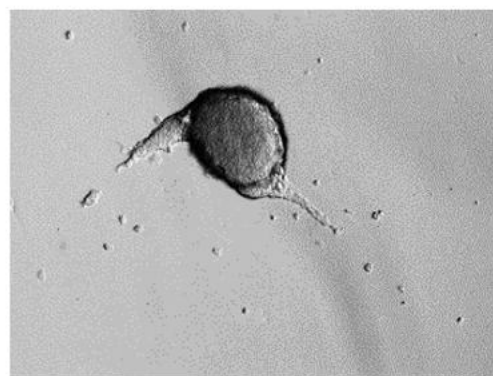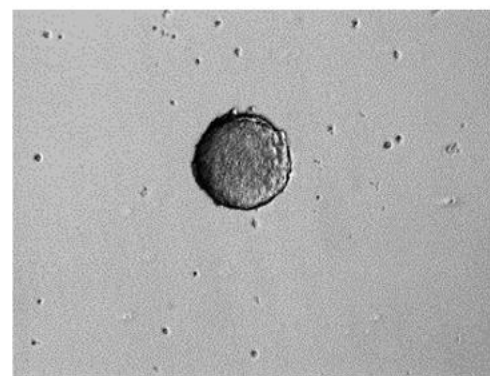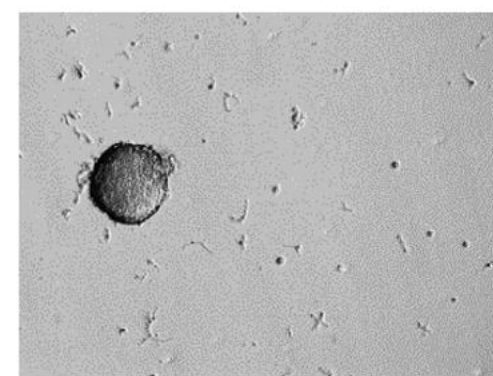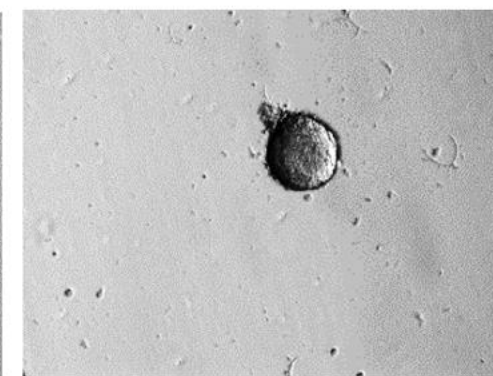*tert* KO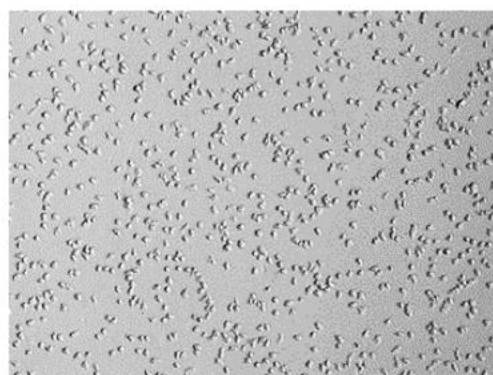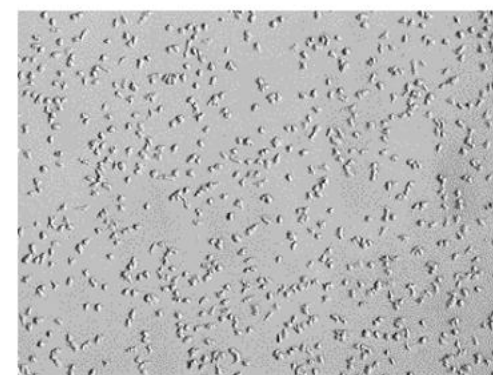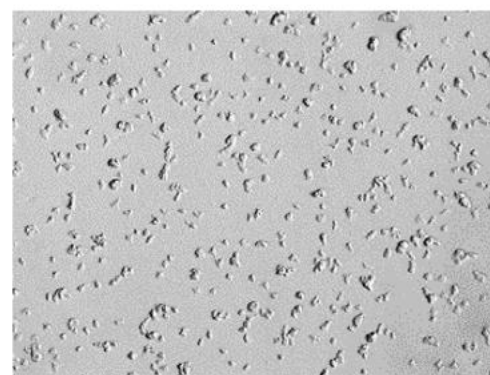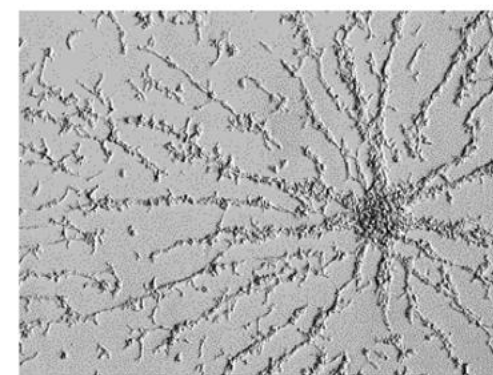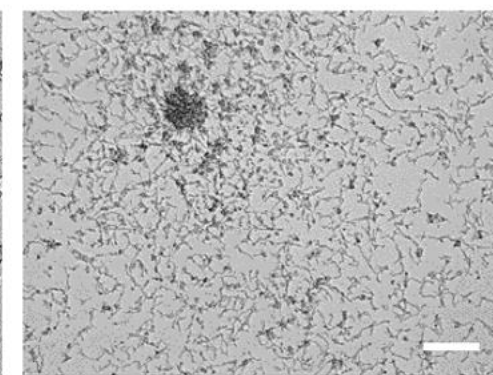**B**

8h

10h

16h

30h

36h

AX2+  
8Br cAMP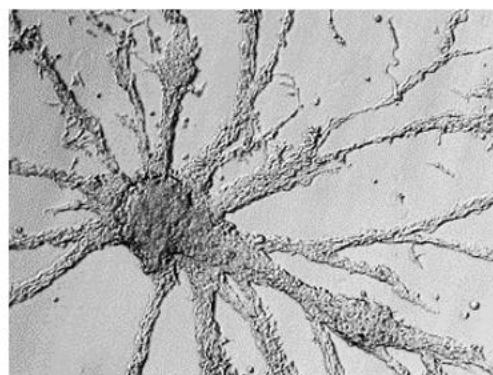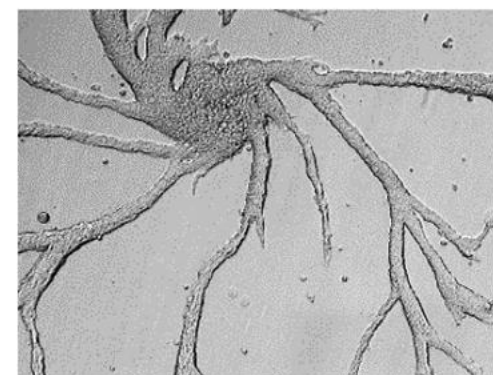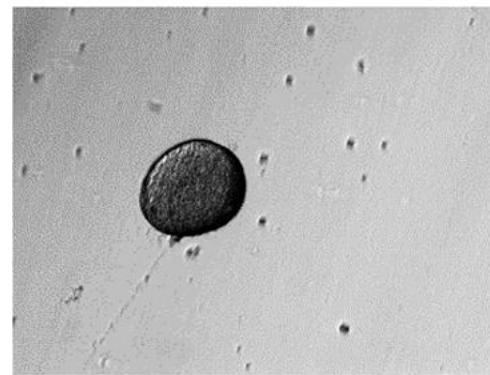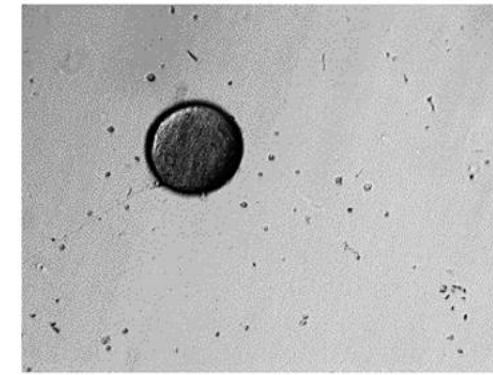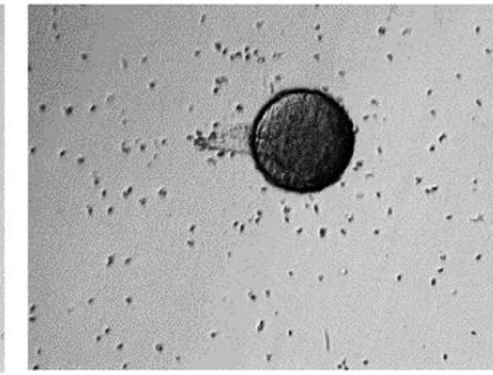*tert* KO+  
8Br cAMP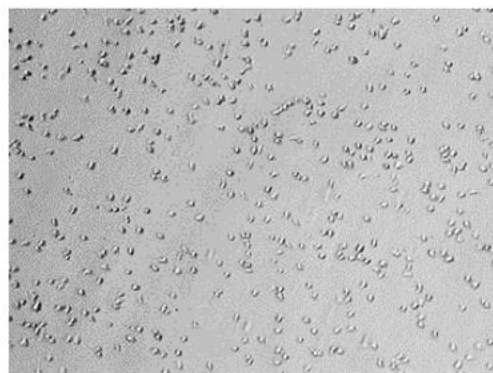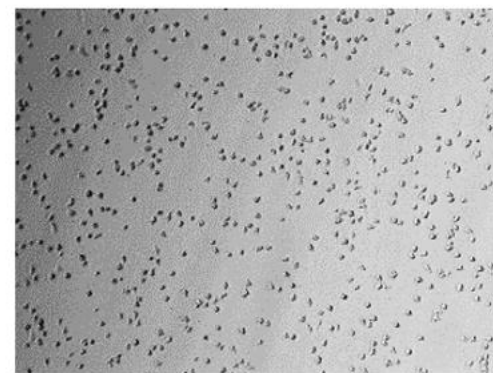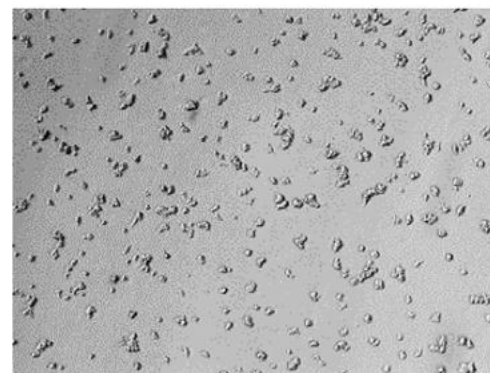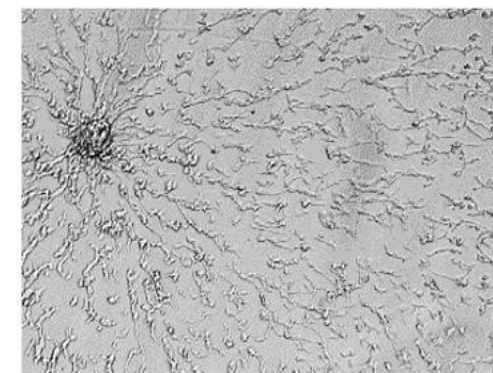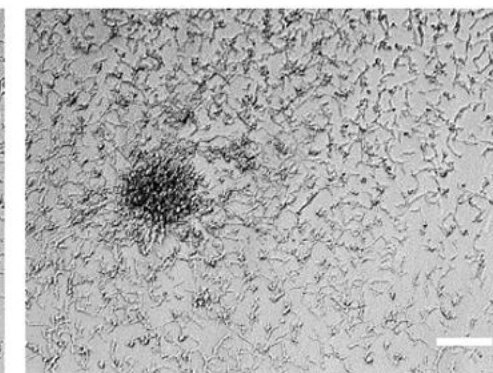



**A**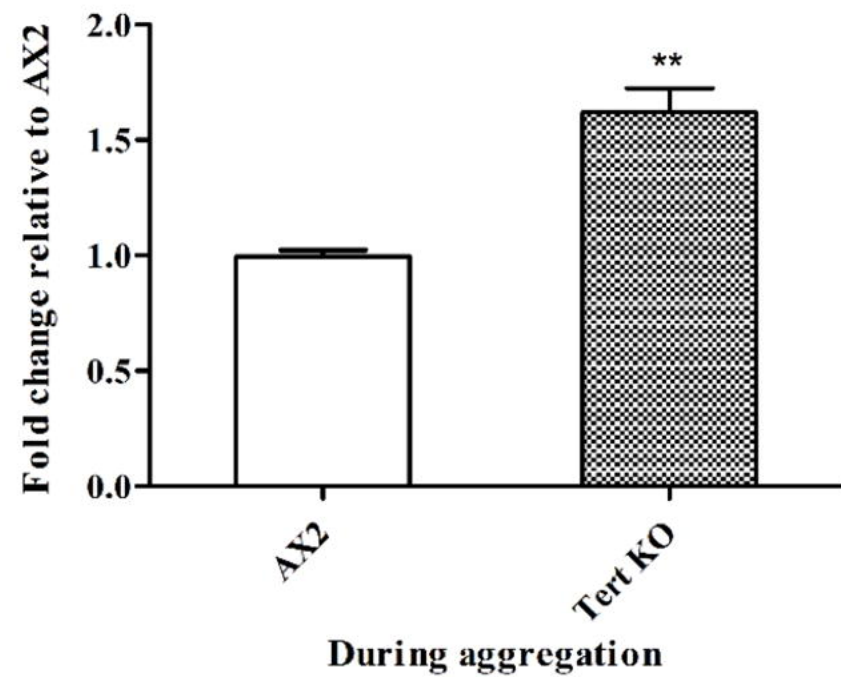**B**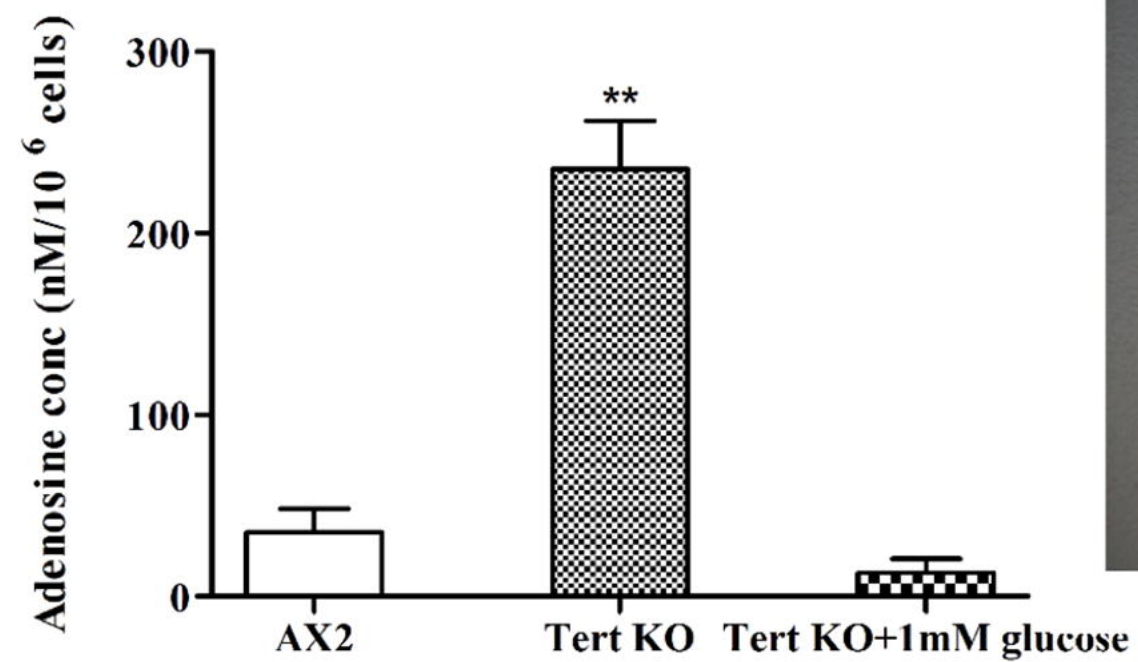**C**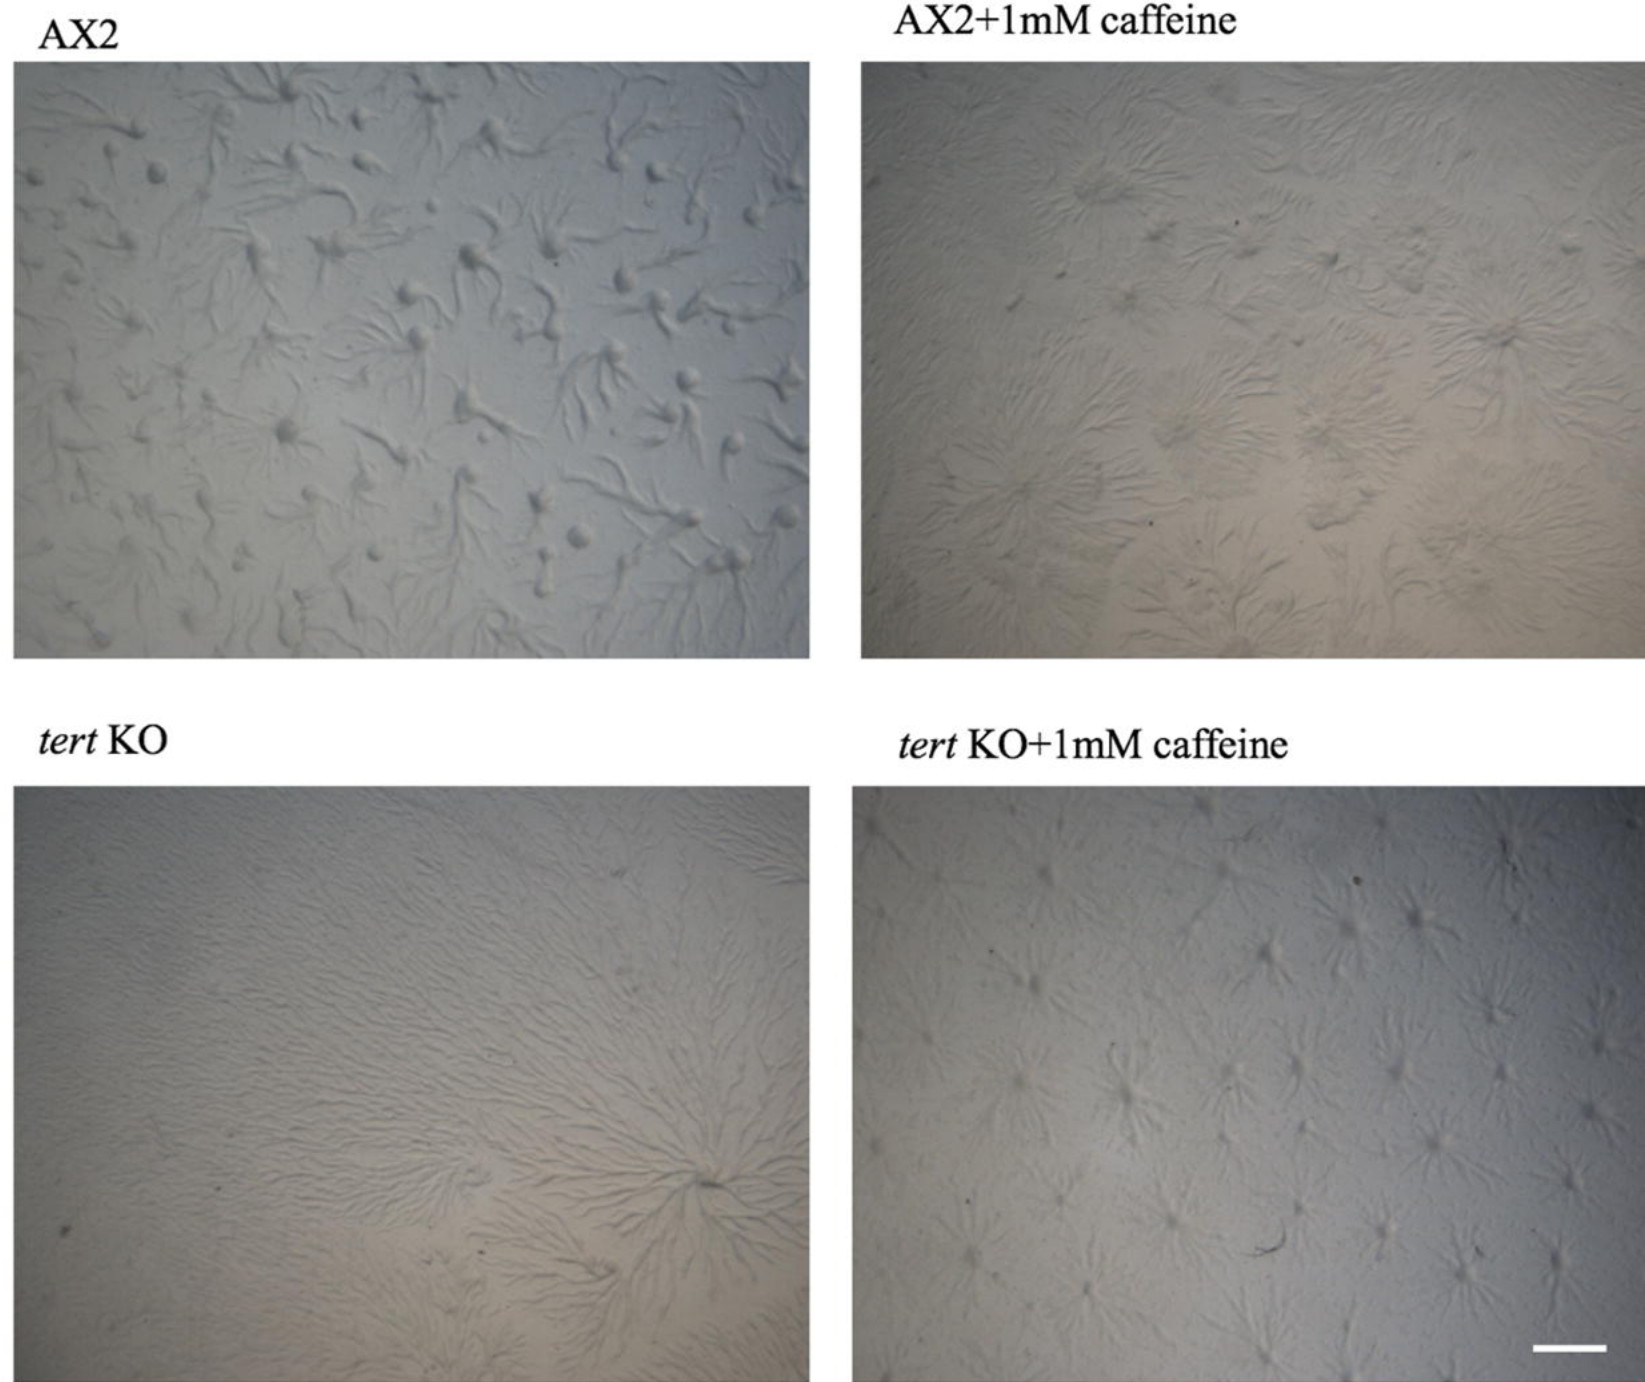

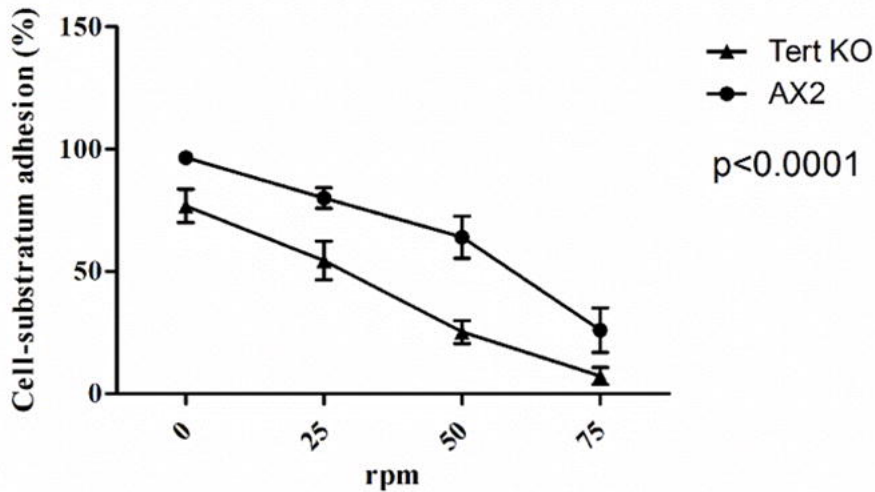

**A**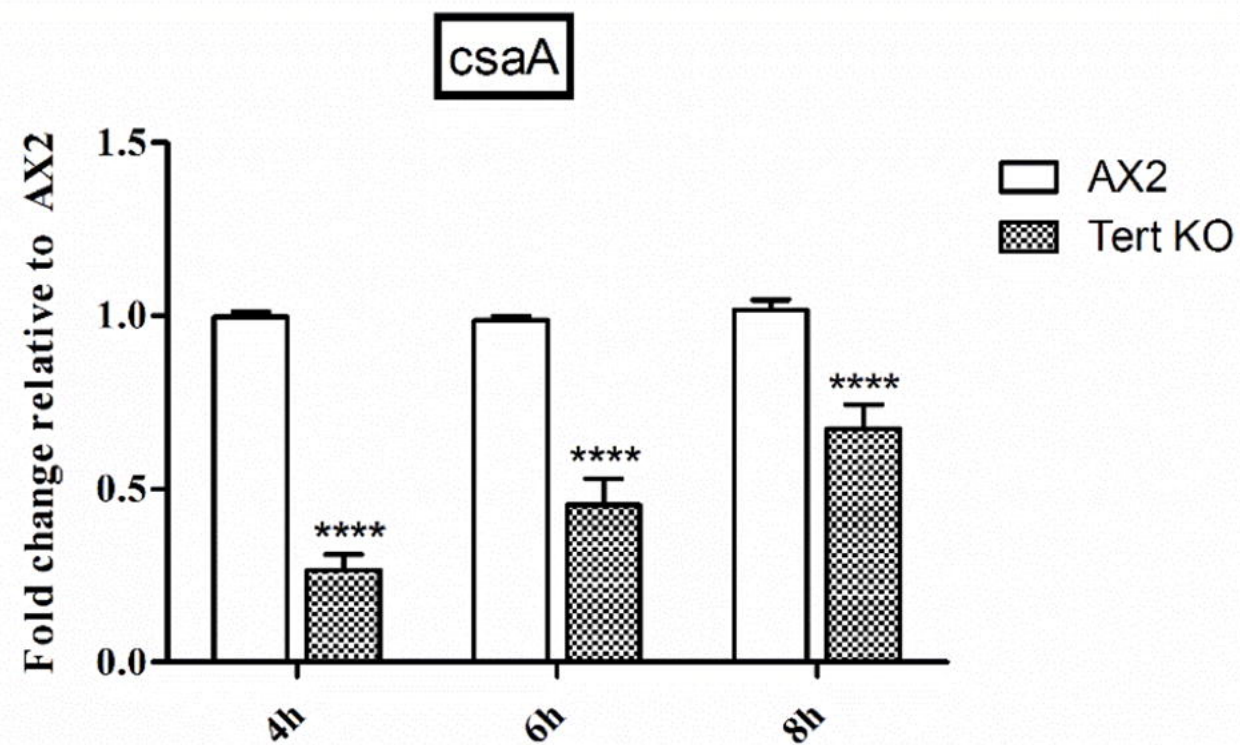**B**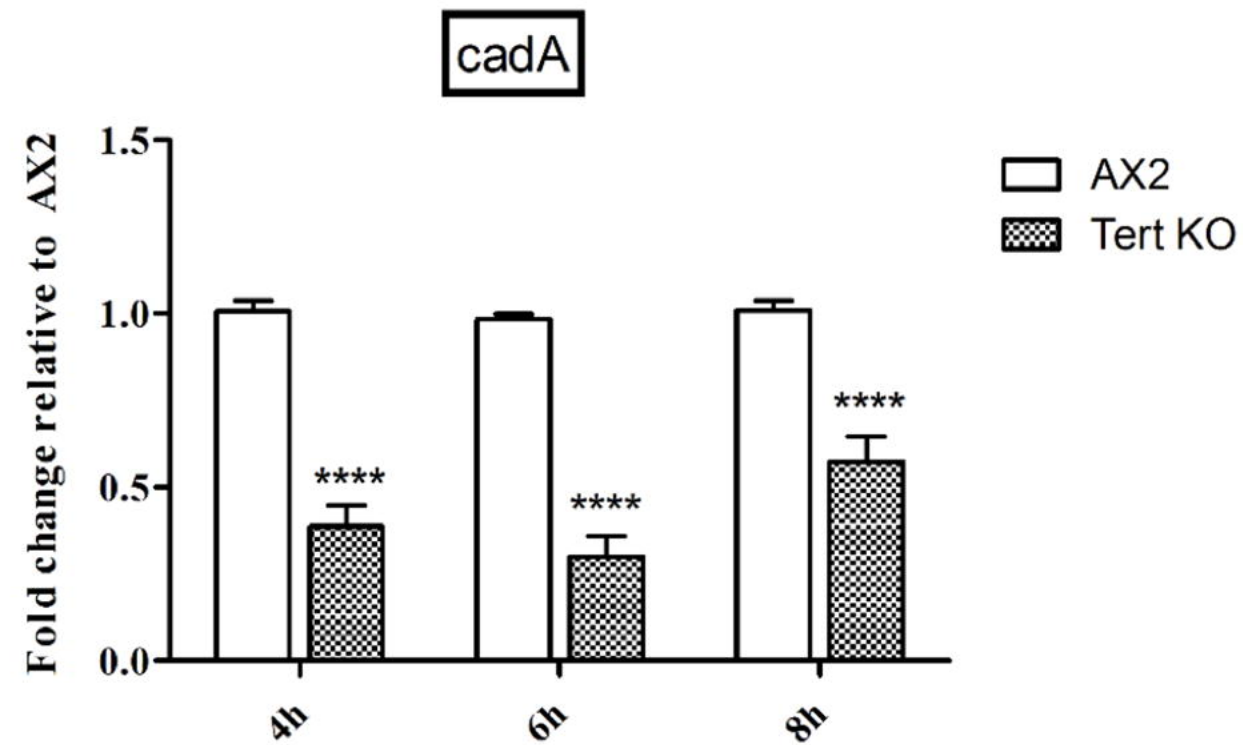**C**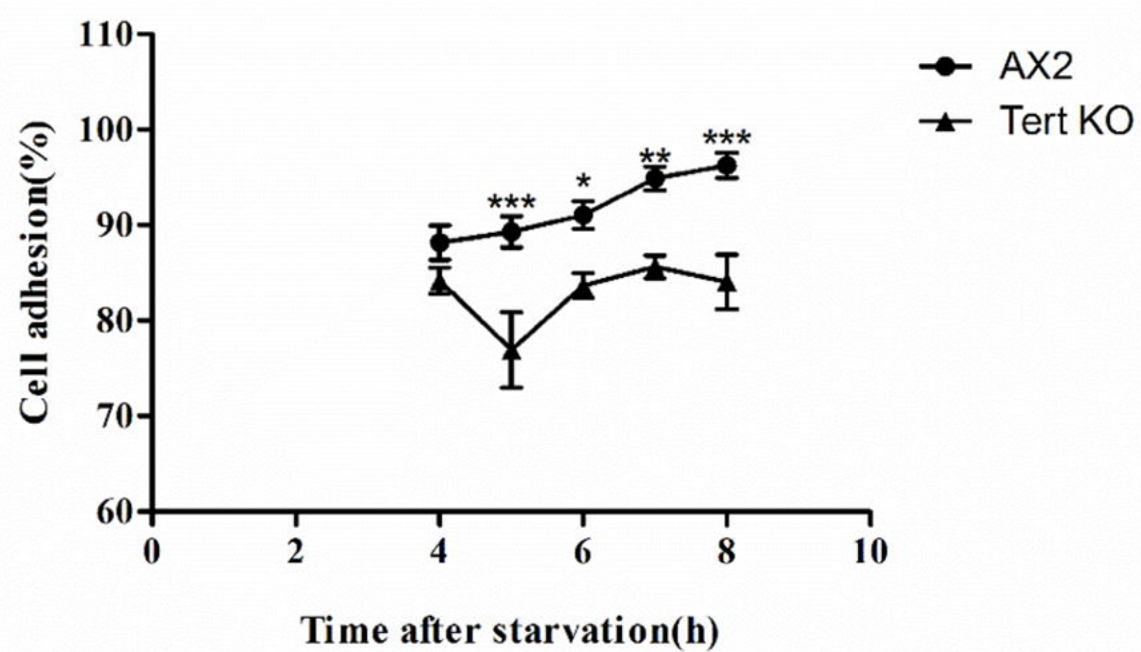**D**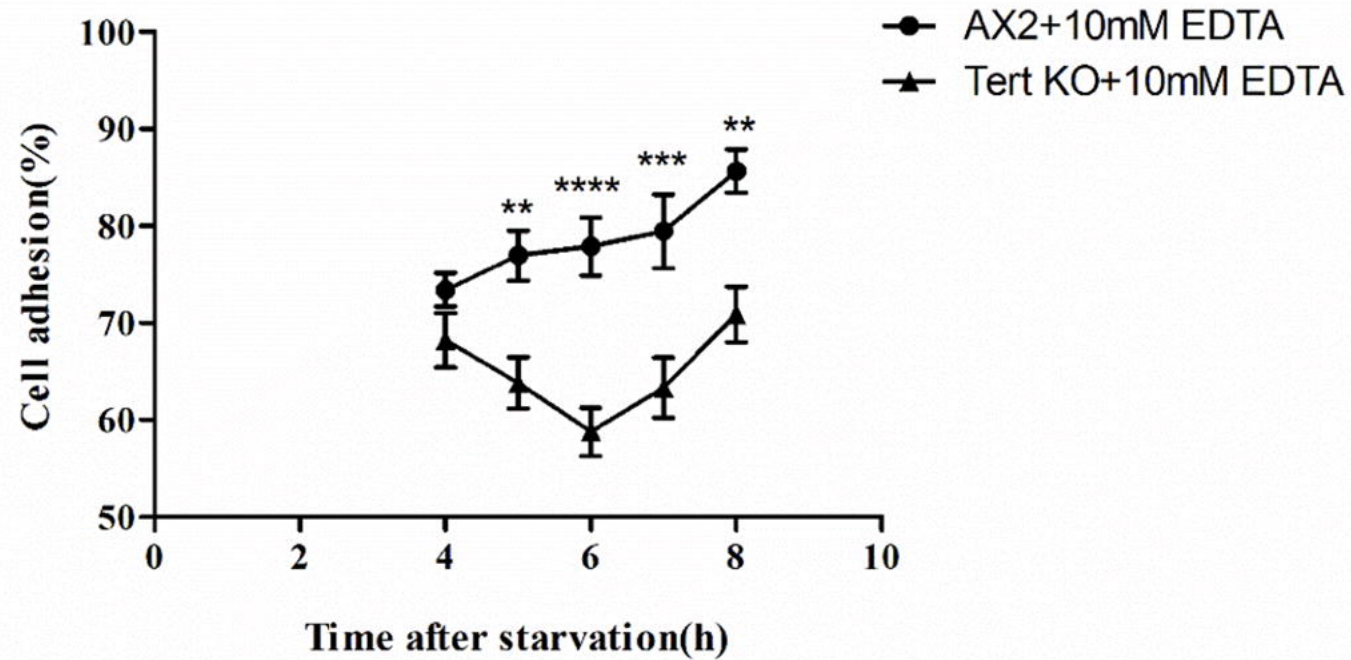



16h

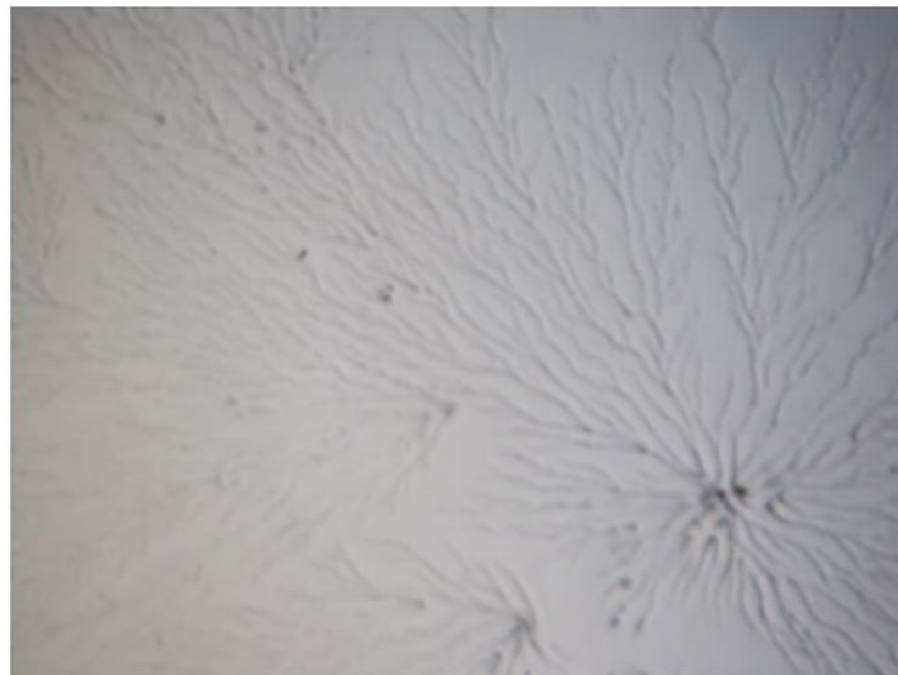

90% *tert* KO+  
10% AX2

14h

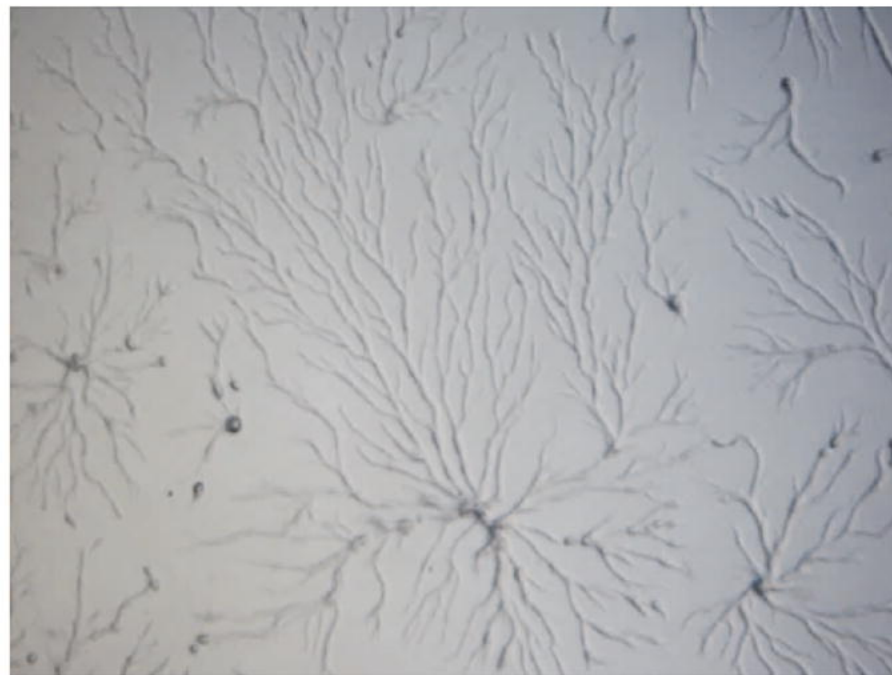

80% *tert* KO+  
20% AX2

8h

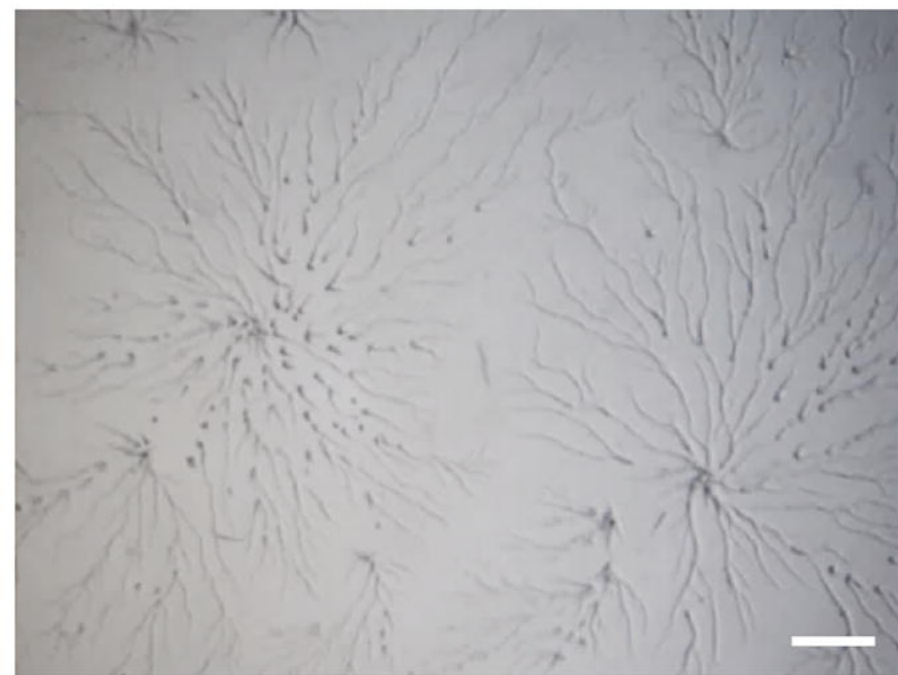

50% *tert* KO+  
50% AX2

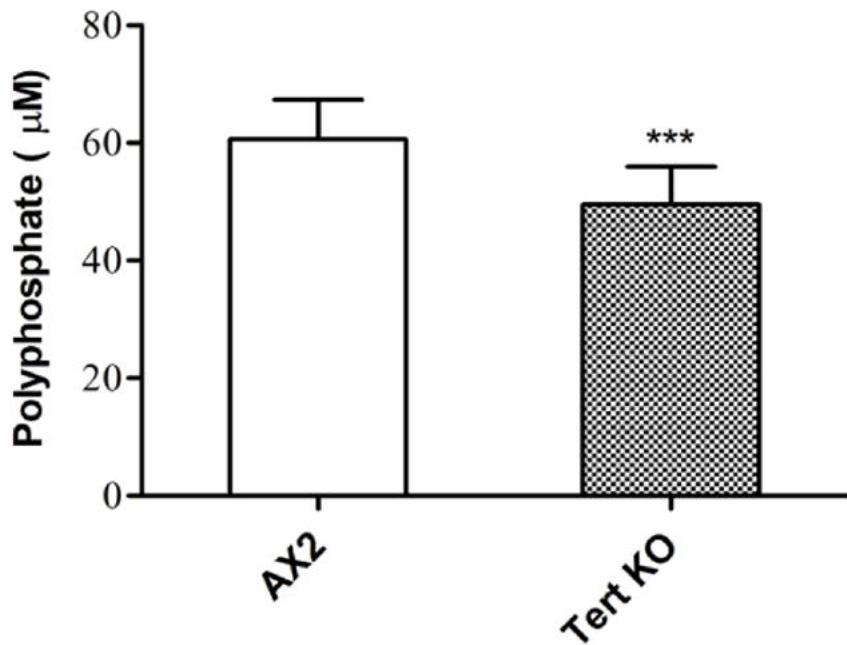

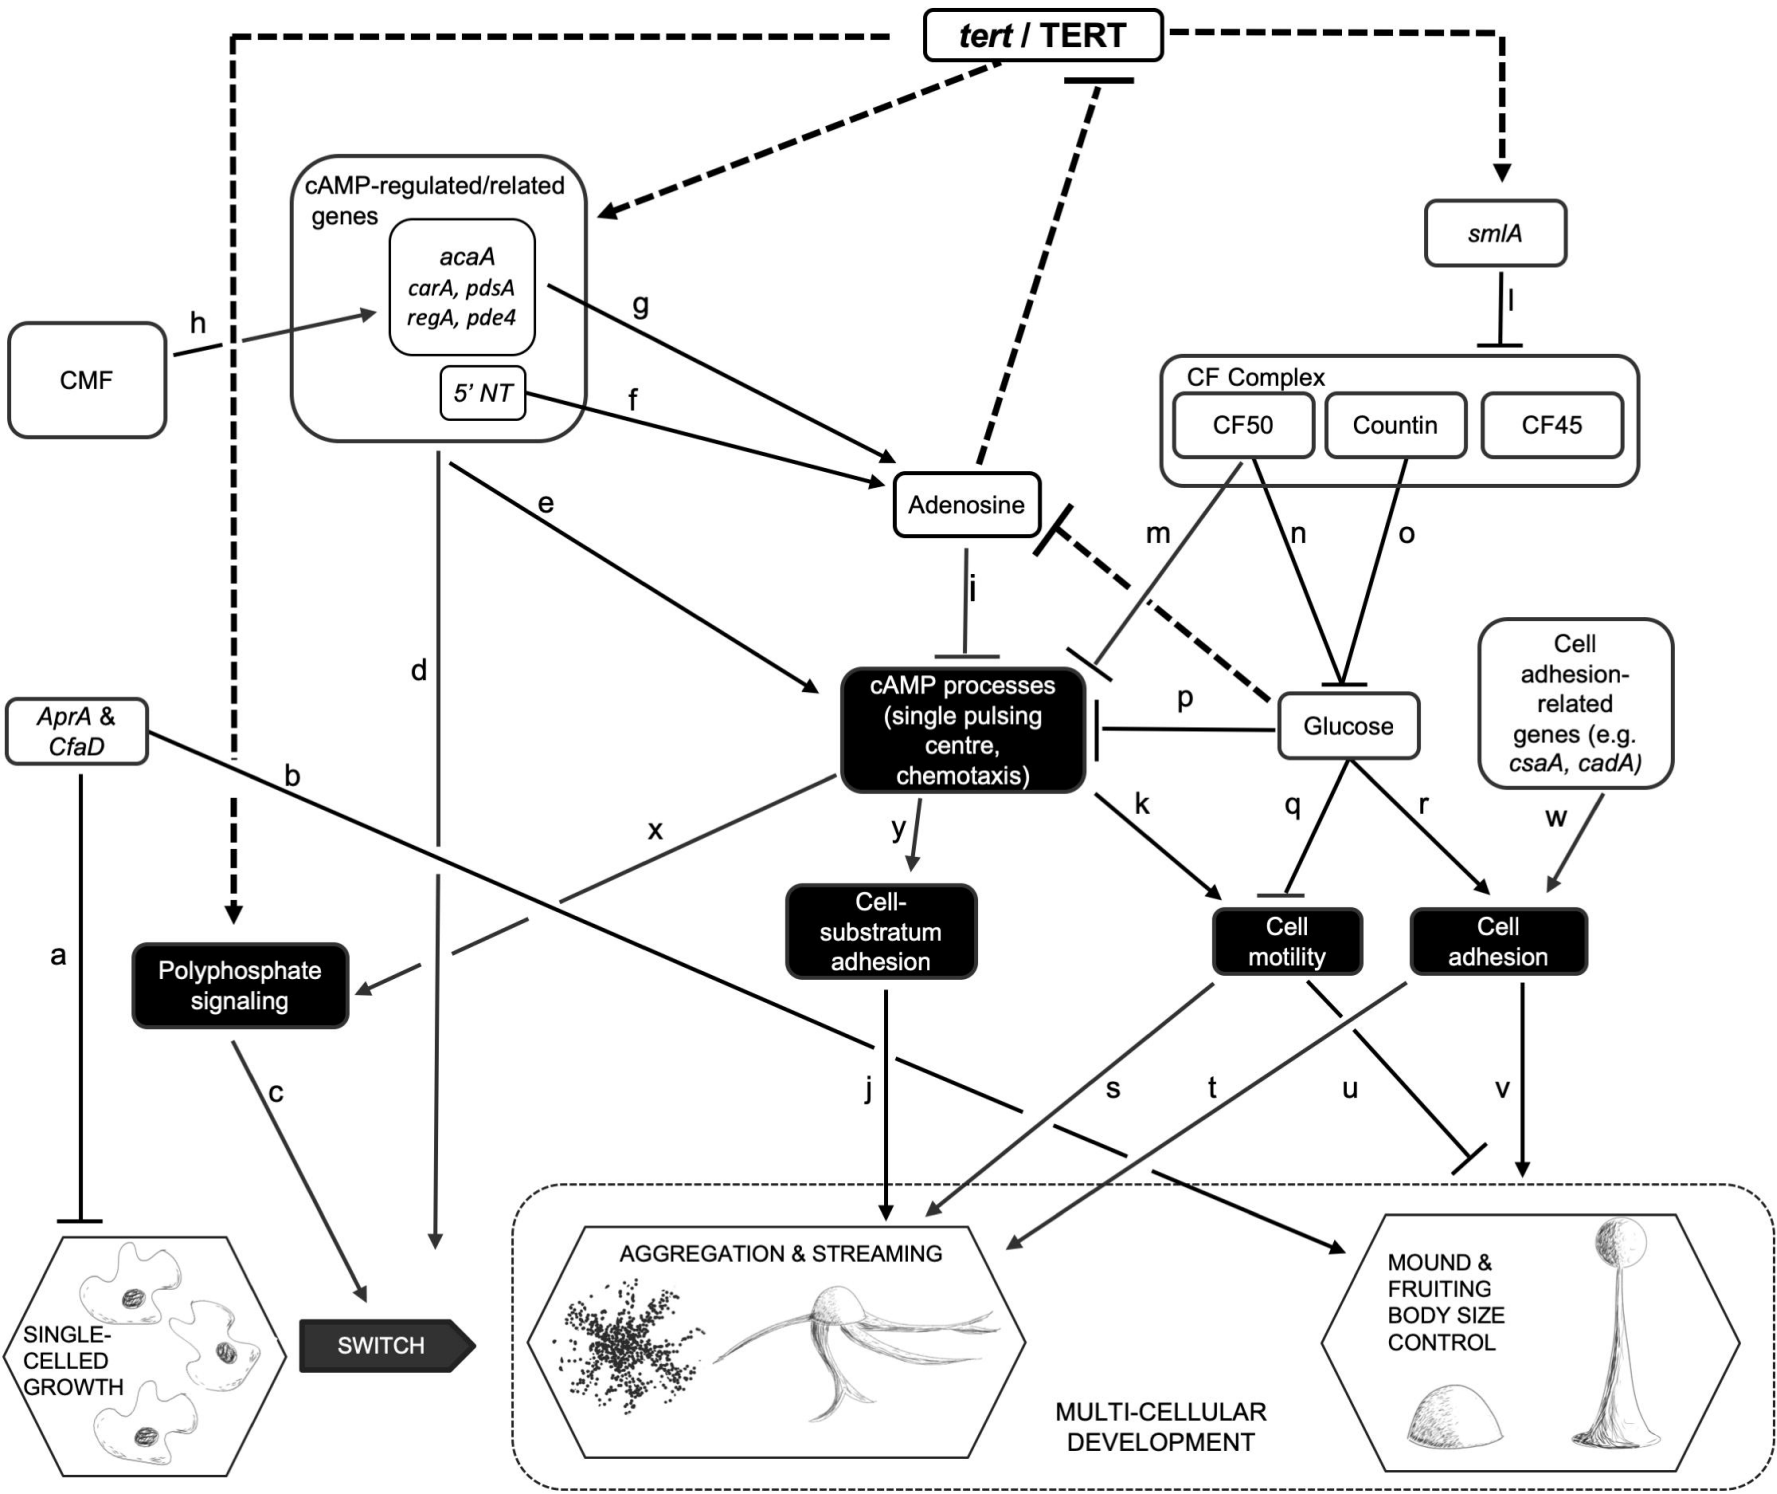

Source: http://biorxiv.org/content/10.1101/556977v1.full.pdf
